# Supplementary material for: Autophagy acts through TRAF3 and RELB to regulate gene expression via antagonism of SMAD proteins
Source: Nat Commun. 2017 Nov 16;8:1537. doi: 10.1038/s41467-017-00859-z (PMC5691083; doi:10.1038/s41467-017-00859-z)
Supplement: Supplementary file 6 — Supplementary Data 1 [file 41467_2017_859_MOESM6_ESM.xlsx]

## Sheet: |FOLD CHANGE| >  1.5 ATG
		Normalised probe intensity (mean three biological replicates)							Ratios
Probe	Gene	siCtrl	siCtrl-2	siATG5	siULK1	siRELB	siRELB-2		RELB/NTC	ATG/NTC
ILMN_1676278	ABCC2	642.58	626.645	404.634	433.761	423.632	479.981		0.711941	0.660556
ILMN_1671703	ACTA2	827.372	689.311	1681.26	1255.33	1801.67	1741.21		2.33594	1.93619
ILMN_1713751	ADAM19	514.644	540.55	1174.37	1385.2	1979.64	1298.91		3.10705	2.42569
ILMN_1708934	ADM	2341.97	2117.51	1356.05	1402.38	1599.19	1467.49		0.687677	0.618553
ILMN_3307841	AGR2	191.134	226.307	120.569	147.701	165.457	456.137		1.48906	0.642655
ILMN_2412336	AKR1C2	14234.6	9424.19	5749.48	8642.51	5999.88	6075.19		0.510385	0.608316
ILMN_1687757	AKR1C4	9480.26	6117.86	3867.33	5591.56	3692.54	4292.91		0.511949	0.606412
ILMN_1702503	ALDH3A1	3542.07	2481.72	1473.34	1218.09	1125.02	2095.9		0.5347	0.4468
ILMN_1797875	ALOX5AP	181.889	176.197	292.317	355.312	349.153	229.888		1.61705	1.80859
ILMN_1736412	AMHR2	240.228	178.946	130.285	136.516	132.473	161.253		0.700724	0.636494
ILMN_1707727	ANGPTL4	390.336	427.827	863.698	820.857	1294.19	708.336		2.44759	2.05895
ILMN_1678143	ARHGDIB	252.381	320.199	421.121	602.027	621.006	375.878		1.74104	1.78691
ILMN_1703123	AXUD1	261.828	354.581	465.36	475.547	730.763	424.036		1.87343	1.52643
ILMN_1661500	B4GALT4	665.861	494.668	387.504	382.105	410.233	492.21		0.777614	0.663154
ILMN_1776181	BIRC3	485.734	459.479	335.726	211.481	233.239	339.647		0.606093	0.578925
ILMN_1746819	C5	353.307	443.568	209.714	184.13	185.105	256.343		0.553974	0.494236
ILMN_1803338	CCDC80	157.345	129.14	222.182	216.098	296.697	137.337		1.51503	1.52985
ILMN_1760247	CD70	314.591	266.261	484.915	412.042	657.22	349.553		1.73327	1.54421
ILMN_1779228	CDH2	2005.28	2158.58	3906.8	3625.74	4074.11	2820.43		1.65581	1.80903
ILMN_1712522	CEACAM6	270.894	95.6766	84.8613	86.4991	94.0781	115.379		0.571397	0.467469
ILMN_2359945	CES1	221.651	143.583	283.727	362.35	292.351	298.222		1.61697	1.76894
ILMN_2044645	CGB1	250.278	221.31	374.109	700.591	459.16	344.86		1.70492	2.27889
ILMN_2163790	CGB5	180.189	150.175	226.058	430.606	315.472	207.632		1.58342	1.9877
ILMN_1741176	CHMP2B	730.397	710.096	401.22	528.013	556.018	702.983		0.874007	0.64508
ILMN_1784532	COL22A1	96.6964	104.979	209.913	120.442	267.966	131.903		1.98273	1.63805
ILMN_1653028	COL4A1	1189.35	955.21	1927.61	2777.11	3337.04	2142.89		2.55527	2.19379
ILMN_1724994	COL4A2	167.445	161.441	234.064	270.293	300.482	212.888		1.56093	1.53353
ILMN_1706505	COL5A1	775.467	1178.41	2202.81	2523.78	2616.16	847.793		1.77286	2.41908
ILMN_1694432	CRIP2	199.652	168.3	318.904	248.159	275.193	245.284		1.41453	1.54114
ILMN_1759766	CTXN1	456.495	559.579	1149.01	845.335	657.991	656.259		1.29346	1.96279
ILMN_1798360	CXCR7	681.835	447.187	899.851	863.197	961.267	455.267		1.25466	1.56157
ILMN_2312194	CYB5A	435.565	421.994	280.063	273.252	301.207	378.936		0.793116	0.645221
ILMN_1730612	DBNDD2	471.756	469.05	335.055	196.388	298.644	339.735		0.678545	0.56488
ILMN_2384857	DHRS2	93.0287	102.868	188.246	125.256	125.795	136.548		1.33919	1.60035
ILMN_1773337	DKK1	1236.91	1851.84	771.429	783.829	1105.63	1888.82		0.969471	0.503524
ILMN_1815673	DKK3	296.143	306.54	446.35	790.748	709.312	421.084		1.87561	2.05265
ILMN_2398159	DKK3	343.268	366.244	573.011	933.595	988.986	540.491		2.15567	2.12344
ILMN_1792356	DPYSL4	373.059	407.153	656.534	622.605	797.202	683.689		1.89806	1.63948
ILMN_1681890	DYNLT3	236.99	271.181	311.34	451.347	324.889	321.853		1.27268	1.50085
ILMN_2108735	EEF1A2	779.303	1096.37	2013.09	1374.58	1656.69	997.261		1.41493	1.80611
ILMN_2350634	EFEMP1	213.947	292.218	343.298	451.3	531.872	386.506		1.81438	1.56984
ILMN_1761463	EFHD2	2266.11	2268.96	1176.48	1678.18	1388.95	1877.25		0.720211	0.629463
ILMN_1769201	ELF3	473.076	282.736	170.74	145.648	152.811	215.926		0.487868	0.418605
ILMN_1692261	EPHB1	102.51	116.331	249.114	158.453	176.551	132.629		1.41281	1.86238
ILMN_1665510	ERRFI1	979.466	801.271	484.296	488.082	548.401	1023.75		0.882864	0.546054
ILMN_1758672	FAM107B	1323.76	1099.19	975.408	639.554	762.033	1072.71		0.757235	0.666528
ILMN_3194638	FAM176A	144.123	159.423	211.276	280.161	190.861	163.131		1.16619	1.61899
ILMN_3271098	FAM176A	151.377	163.138	220.225	266.922	192.356	162.785		1.12917	1.54888
ILMN_1652280	FBXO32	138.309	131.635	275.645	197.852	160.618	237.525		1.4749	1.75405
ILMN_1703955	FBXO32	213.255	200.672	586.52	345.878	304.624	419.559		1.74954	2.25257
ILMN_2355831	FHL2	1680.37	1455.17	2381.87	2423.44	2573.56	2538.5		1.63036	1.53253
ILMN_2041222	FLJ40504	6381.3	3585.69	2869.79	3259.93	3962.26	4506.87		0.849718	0.615002
ILMN_1715748	FLNC	104.874	107.113	187.971	298.58	159.864	144.242		1.43455	2.29519
ILMN_1769615	FLRT2	314.377	315.12	558.935	449.52	630.404	392.493		1.62494	1.602
ILMN_2362581	FNDC3A	146.724	210.84	281.292	316.16	295.196	375.721		1.87636	1.6709
ILMN_1705111	FNDC3A	169.56	201.571	273.303	326.481	315.381	336.912		1.75758	1.6161
ILMN_1704418	FOXD1	352.411	394.741	615.715	606.925	800.601	488.485		1.72533	1.6364
ILMN_1811790	FOXS1	101.127	101.844	141.347	166.08	159.222	110.414		1.32845	1.51464
ILMN_2330787	FRMD6	423.913	360.804	581.506	1101.29	816.978	514.388		1.69662	2.14447
ILMN_1769282	FRMD6	911.008	908.621	1364.4	1996.45	2017.3	1165.57		1.74918	1.847
ILMN_2289593	FXYD2	2024.14	887.514	665.871	532.273	789.468	997.569		0.613754	0.4115
ILMN_1704286	FXYD5	606.815	769.174	1027.36	1452.21	1068.64	950.378		1.46732	1.80203
ILMN_2309848	FXYD5	1798.58	2579.74	3189.63	3557.24	3576.26	3435.58		1.60149	1.54097
ILMN_1682015	GAL	140.037	133.328	167.286	359.861	220.493	159.115		1.38865	1.92836
ILMN_1730575	GCLC	714.539	545.939	394.74	360.688	360.955	345.85		0.560743	0.599319
ILMN_2188862	GDF15	513.234	304.75	226.599	212.859	232.937	416.785		0.794298	0.537246
ILMN_1769245	GLIPR1	256.457	292.119	390.291	678.834	1184.1	1253.36		4.44324	1.94891
ILMN_1652631	GLIPR2	262.836	284.721	679.473	815.203	686.805	399.472		1.98386	2.72972
ILMN_2133205	GPX2	3520.36	1124.77	432.048	453.549	351.535	1533.16		0.405734	0.190651
ILMN_1651496	HIST1H2BD	452.358	386.423	652.694	962.908	1010.6	576.297		1.89191	1.92613
ILMN_1758623	HIST1H2BD	255.716	243.036	356.462	428.815	518.025	306.582		1.65334	1.57448
ILMN_1796179	HIST1H2BK	1668.36	2429.3	2739.3	5035.62	4981.66	2477.79		1.82042	1.89741
ILMN_1676563	HTRA1	194.091	370.086	573.549	411.744	551.135	344.852		1.58813	1.74643
ILMN_2062468	IGFBP7	375.334	604.184	940.093	987.51	1727.78	1114.71		2.90193	1.96791
ILMN_1788107	IL11	184.937	240.979	409.669	945.096	530.491	343.542		2.05213	3.18082
ILMN_2368530	IL32	261.887	181.481	350.261	381.943	456.574	475.906		2.10318	1.65146
ILMN_2184373	IL8	359.388	249.29	639.943	474.752	460.491	1919.08		3.9094	1.83134
ILMN_1685714	INHBB	208.502	123.77	103.476	111.405	97.8155	109.118		0.622782	0.646702
ILMN_1764177	JARID2	175.712	160.01	240.736	266.055	305.383	234.077		1.60687	1.50956
ILMN_1673769	KCNG1	229.411	280.185	453.6	452.61	406.228	346.051		1.47622	1.77829
ILMN_3263974	KRT18P13	2577.32	1454.2	1173.18	1428.16	1597.09	1669.75		0.810323	0.64525
ILMN_1753584	KRT8	2203.19	1242.64	1064.38	1167.68	1450.17	1426.38		0.83479	0.647758
ILMN_1737514	KYNU	1583.01	1332.27	884.275	1034.04	982.129	1908.94		0.991694	0.658021
ILMN_1663401	LARP6	602.094	603.472	874.56	1053.92	565.186	573.445		0.944478	1.59965
ILMN_1663080	LFNG	306.35	367.435	540.338	491.036	487.182	289.829		1.1532	1.53072
ILMN_1733559	LOC100008589	1057.34	1059.32	1532.27	1681.72	1294.39	1537.36		1.33784	1.51842
ILMN_3251587	LOC100008589	3998.69	4106.01	6391.85	6885.06	4972.2	5977.69		1.35106	1.63817
ILMN_3191393	LOC100128892	182.007	147.241	271.565	284.437	385.227	164.675		1.67018	1.68871
ILMN_3231944	LOC100130516	2211.36	2055.38	1482.66	1296.23	2400.43	1579.37		0.93275	0.65129
ILMN_3249578	LOC100132394	1130.89	1075.71	1535.51	1791.06	1441.91	1417.84		1.29599	1.50755
ILMN_3243644	LOC100132564	908.364	1077.85	1753.26	2053.15	1191.4	1761.69		1.48679	1.91641
ILMN_3209399	LOC399965	521.125	306.604	264.012	281.221	371.678	355.561		0.878596	0.65871
ILMN_1671971	LOC644743	4691.32	2540.08	2328.83	2472.51	2994.91	2801.42		0.801551	0.663957
ILMN_1668863	LYPD1	377.447	454.756	721.59	528.361	598.137	407.658		1.20859	1.50198
ILMN_3310491	MIR1978	3591.52	3307.96	1934.77	2588.72	1687.36	5754.99		1.07868	0.655628
ILMN_2111237	MN1	199.498	171.917	260.267	315.926	293.513	123.691		1.12328	1.55134
ILMN_1695576	MRPL24	1368.66	1205.41	1055.84	645.693	910.122	866.939		0.690371	0.661027
ILMN_1691156	MT1A	1575.9	1856.31	2043.23	3745.83	4214.97	4328.4		2.48918	1.68669
ILMN_1686664	MT2A	2624.76	2907.48	3304.67	6317.78	6716.87	7189.76		2.51374	1.73934
ILMN_1743836	MXRA7	230.693	243.708	359.627	367.127	337.99	250.556		1.24061	1.53194
ILMN_1680774	NLRP1	110.785	140.093	203.385	253.88	191.902	114.106		1.21975	1.82266
ILMN_1814221	NPTX1	183.405	384.811	917.316	744.396	655.005	282.932		1.65067	2.92444
ILMN_1744381	PAI1	1886.56	1448.76	2182.6	4854.28	3855	2570.72		1.92657	2.10981
ILMN_1721770	PAPPA	559.415	513.7	818.961	1257.97	529.713	797.195		1.2365	1.93542
ILMN_1683023	PDGFC	177.114	208.149	360.332	335.709	376.497	216.237		1.53852	1.80667
ILMN_1672504	PDXK	1826.65	1169.72	1082.1	913.418	1405.85	927.342		0.778675	0.66598
ILMN_1653292	PFKFB4	239.471	265.835	316.375	576.006	385.531	313.18		1.38275	1.76602
ILMN_1703433	PLSCR3	886.074	1173.13	1550.13	1555.25	1496.18	2010.71		1.70304	1.50805
ILMN_1734276	PMEPA1	1660.99	1528.74	3025.64	2501.58	2715.3	2078.6		1.50292	1.73282
ILMN_2309156	PMEPA1	843.243	809.057	1692.48	1260.22	1337.23	1171.93		1.51859	1.78702
ILMN_1785646	PMP22	836.938	899.023	546.742	552.973	479.909	667.613		0.661031	0.633491
ILMN_2413158	PODXL	1228.19	1089.58	1912.76	2039.11	2123.21	1623.91		1.61669	1.70503
ILMN_1711311	PODXL	212.074	188.201	283.649	322.918	325.998	250.261		1.43966	1.51538
ILMN_1675656	PPFIBP2	440.479	445.618	227.502	172.86	192.392	234.142		0.481364	0.451827
ILMN_1797776	PRSS23	1784.13	1344.62	2402.81	2531.8	2229.52	1843.52		1.30181	1.57718
ILMN_1692219	RAB11FIP1	836.86	545.078	491.06	343.287	407.257	364.596		0.55853	0.603752
ILMN_1776519	RAP1GAP	527.615	482.824	313.687	327.363	309.704	254.639		0.558513	0.634427
ILMN_1800787	RFTN1	369.802	382.219	585.498	566.307	491.268	477.749		1.28855	1.53161
ILMN_3308138	RNU4-2	142.552	141.299	214.3	265.421	119.158	198.513		1.11915	1.69005
ILMN_3235325	SCARNA13	202.351	234.833	333.02	474.434	172.546	292.39		1.06348	1.84694
ILMN_3247159	SCARNA8	113.643	111.944	133.459	308.76	99.608	111.285		0.934863	1.9603
ILMN_2065773	SCG5	132.877	148.345	378.116	336.016	302.138	364.151		2.36926	2.53939
ILMN_1815308	SDC1	1185.92	1444.47	2183.82	2193.54	2678.5	2214.2		1.86007	1.66415
ILMN_1717639	SIK1	318.39	286.035	402.966	539.346	397.944	437.669		1.38249	1.55902
ILMN_2364022	SLC16A3	237.539	394.92	501.16	534.177	767.847	603.05		2.16757	1.637
ILMN_2050911	SLC22A4	138.927	147.452	226.215	223.504	153.666	140.131		1.02591	1.57037
ILMN_1778595	SLN	109.832	101.104	110.273	269.695	159.154	111.122		1.28132	1.80134
ILMN_1655740	SNAI2	118.524	127.481	189.86	192.531	202.969	138.804		1.38929	1.5544
ILMN_2082585	SNAI2	153.557	147.736	299.839	314.808	312.278	187.79		1.65974	2.04003
ILMN_3238435	SNORA12	250.347	190.742	405.56	428.531	272.949	419.094		1.56894	1.89098
ILMN_3242315	SNORD3D	161.408	208.503	256.36	302.518	180.844	306.769		1.31819	1.51084
ILMN_1653415	SPANXA2	147.931	112.81	166.382	256.626	150.809	164.489		1.20924	1.62234
ILMN_1696731	SPANXB1	194.997	141.635	246.671	435.201	195.555	248.677		1.31963	2.02557
ILMN_2211030	SPANXB1	154.617	122.653	180.485	261.06	159.234	171.965		1.1945	1.59247
ILMN_3244876	SPANXB2	156.616	117.653	212.387	346.11	156.134	206.275		1.32136	2.03631
ILMN_1680689	SPANXB2	173.58	120.236	201.298	321.241	156.174	190.27		1.17913	1.77846
ILMN_1746013	SPOCK1	566.025	892.709	1436.55	1070.11	1645.65	797.633		1.67493	1.71838
ILMN_1709486	SRPX	160.973	262.897	548.72	407.216	460.757	447.018		2.14164	2.25526
ILMN_1758164	STC1	127.497	149.814	260.142	273.114	625.061	304.47		3.35195	1.92296
ILMN_2345142	SULF2	147.239	157.859	309.951	163.844	255.729	161.592		1.36783	1.55293
ILMN_1667460	SULF2	139.501	154.283	304.675	165.448	270.567	167.842		1.49229	1.60024
ILMN_1778668	TAGLN	702.957	609.553	2123.85	2185.58	6489.69	6113.43		9.6023	3.28335
ILMN_2400935	TAGLN	179.794	152.159	398.049	387.379	1150.57	1002.36		6.48565	2.36609
ILMN_1766573	TERC	127.9	126.546	161.552	226.288	120.488	125.839		0.968089	1.52425
ILMN_2096784	TFAP2C	291.159	269.231	188.915	179.918	168.246	252.377		0.750589	0.658172
ILMN_1663866	TGFBI	6922.31	7139.36	11310.2	12021.9	14154.3	7330.31		1.52788	1.65927
ILMN_1784287	TGFBR3	275.674	218.636	153.98	143.424	139.195	199.927		0.68605	0.601654
ILMN_1705750	TGM2	341.205	420.529	732.799	637.761	1072.27	907.054		2.59844	1.79926
ILMN_1686116	THBS1	372.428	289.883	551.643	564.4	661.751	484.77		1.73109	1.68507
ILMN_1721876	TIMP2	847.077	1036.89	1543.08	1631.8	2101.53	1144.87		1.72317	1.68521
ILMN_1663399	TIMP4	193.977	237.302	272.097	415.565	243.047	309.037		1.28011	1.59447
ILMN_1793829	TMCO1	844.602	1960.98	2199.97	2031.32	2283.28	2244.79		1.61395	1.50817
ILMN_1702973	TMEM166	287.818	357.822	530.615	641.664	527.949	364.156		1.38174	1.81569
ILMN_2214197	TP53INP1	150.731	146.305	322.391	197.692	209.902	254.157		1.5623	1.75091
ILMN_1714108	TP53INP1	186.42	194.849	430.222	253.943	270.089	353.633		1.63591	1.79444
ILMN_1789196	TPM2	3267.4	3360.47	4919.54	5129.74	7664.55	6057.91		2.07042	1.51621
ILMN_1653180	TPM4	284.736	178.926	332.697	384.454	378.376	280.267		1.42053	1.54671
ILMN_1680874	TUBB2B	398.8	557.059	913.715	752.937	471.666	404.228		0.916342	1.74362
ILMN_1798256	UPP1	1025.16	737.531	570.944	530.9	637.281	751.089		0.787642	0.625092
ILMN_1701875	ZYX	709.786	806.14	1150.77	1173.37	1833.94	1072.45		1.91724	1.53315
ILMN_1829845		428.474	559.336	294.185	280.305	250.888	324.342		0.582328	0.581579

## Sheet: FDR 0.1 ATG RNAi
		Normalised probe intensity (mean three biological replicates)							Ratios
Probe	Gene	siCtrl	siCtrl-2	siATG5	siULK1	siRELB	siRELB-2		RELB/NTC	ATG/NTC
ILMN_1735045	A4GALT	107.51	106.154	98.0622	101.221	98.8515	99.4237		0.927977	0.932693
ILMN_1802404	ABCC1	138.061	131.376	119.068	118.767	115.823	132.658		0.922224	0.882709
ILMN_1676278	ABCC2	642.58	626.645	404.634	433.761	423.632	479.981		0.711941	0.660556
ILMN_1801767	ABHD3	238.625	200.512	133.566	165.303	159.031	208.678		0.837344	0.680582
ILMN_3236756	ACSF2	103.559	101.955	111.231	114.232	112.08	114.832		1.10412	1.09707
ILMN_1671703	ACTA2	827.372	689.311	1681.26	1255.33	1801.67	1741.21		2.33594	1.93619
ILMN_2319825	ACYP1	243.193	222.973	187.224	190.203	173.382	171.726		0.740311	0.809642
ILMN_1694233	ACYP1	330.006	325.571	259.189	280.422	241.618	241.949		0.737621	0.823109
ILMN_1713751	ADAM19	514.644	540.55	1174.37	1385.2	1979.64	1298.91		3.10705	2.42569
ILMN_2143210	ADAM6	95.3964	98.3036	91.3077	87.0779	96.8421	95.9703		0.995418	0.920938
ILMN_2096322	ADIPOR1	265.049	281.014	234.035	221.238	330.218	350.146		1.24595	0.833738
ILMN_1708934	ADM	2341.97	2117.51	1356.05	1402.38	1599.19	1467.49		0.687677	0.618553
ILMN_1747227	ADORA1	111.101	113.374	139.644	168.21	142.543	157.039		1.33459	1.37145
ILMN_1807372	ADORA2A	100.284	102.687	94.3227	93.3817	98.7333	99.7958		0.978116	0.924785
ILMN_1720235	ADSSL1	100.355	101.159	115.603	112.986	105.128	108.502		1.06012	1.13436
ILMN_1703228	AGFG2	122.69	121.412	107.377	103.793	112.901	115.254		0.934671	0.865087
ILMN_1667564	ALDH3A2	290.396	286.204	187.468	205.44	197.794	159.495		0.619648	0.681423
ILMN_1794825	ALDH3A2	1300.68	1214.88	972.16	774.644	880.45	820.237		0.676068	0.6944
ILMN_2401641	ALDH3A2	739.467	771.235	553.213	456.577	489.148	442.565		0.616741	0.668424
ILMN_2096985	ALDH6A1	110.03	112.009	99.3271	100.352	106.063	115.166		0.996355	0.899301
ILMN_1797875	ALOX5AP	181.889	176.197	292.317	355.312	349.153	229.888		1.61705	1.80859
ILMN_1701603	ALPL	88.0996	93.9907	101.774	100.665	98.0942	94.455		1.05744	1.11175
ILMN_1736412	AMHR2	240.228	178.946	130.285	136.516	132.473	161.253		0.700724	0.636494
ILMN_2386444	ANGPTL4	125.58	126.664	150.495	141.261	183.073	144.113		1.2971	1.15664
ILMN_1707727	ANGPTL4	390.336	427.827	863.698	820.857	1294.19	708.336		2.44759	2.05895
ILMN_1674941	ANO6	588.579	515.101	439	390.743	607.772	572.958		1.06981	0.751797
ILMN_1711899	ANXA2	6294.35	6036.27	5102.48	4746.11	4048.55	4957.35		0.730369	0.79871
ILMN_2399627	AP1G1	261.731	268.681	320.873	292.475	292.253	320.205		1.15468	1.15636
ILMN_1718023	APEH	388.908	373.041	308.484	298.055	296.315	429.99		0.953221	0.796037
ILMN_1767816	APH1B	244.049	220.165	286.602	272.673	294.412	230.2		1.13011	1.20478
ILMN_2081465	APLP2	98.5143	103.897	115.592	110.515	113.269	111.206		1.109	1.11706
ILMN_2219466	APOBEC3B	191.384	187.723	157.466	134.18	134.534	127.704		0.691725	0.769296
ILMN_1761511	APOH	119.709	114.363	97.6675	104.992	94.3147	101.5		0.836557	0.8658
ILMN_1803423	ARHGEF6	94.558	94.662	108.579	104.647	112.171	109.843		1.17331	1.12687
ILMN_1679917	ARL16	314.745	266.357	354.248	416.605	284.644	285.47		0.98109	1.32654
ILMN_2405305	ARNTL	133.249	144.735	158.902	159.066	180.853	147.852		1.18246	1.14384
ILMN_2395711	ARRB2	113.768	115.839	101.395	100.421	97.3332	105.032		0.881355	0.878962
ILMN_1656248	ASAM	111.661	119.886	138.094	131.424	138.589	138.869		1.19828	1.16399
ILMN_2048700	ATAD2	362.578	352.211	293.715	304.344	320.09	206.977		0.737374	0.836694
ILMN_1670609	ATOX1	988.12	1036.14	1349.5	1230.87	1278.1	1362.9		1.30468	1.27472
ILMN_1808115	ATP7A	119.478	115.279	100.035	106.475	111.948	115.466		0.968718	0.879677
ILMN_1685641	BCHE	88.3697	90.959	99.8018	100.095	104.205	95.0271		1.11099	1.1147
ILMN_1706969	BEND6	94.4985	97.6862	106.971	103.963	105.877	103.004		1.08688	1.09756
ILMN_1674160	BIN1	289.072	245.658	192.312	177.511	160.703	170.93		0.620186	0.691607
ILMN_1656373	BNC2	131.44	138.57	165.208	156.17	171.84	164.915		1.24719	1.19024
ILMN_1793966	BOLA1	116.985	115.106	106.865	109.099	115.304	111.768		0.978374	0.93051
ILMN_1689237	BVES	125.413	129.21	161.073	155.667	177.198	189.233		1.43911	1.24396
ILMN_1730945	C19ORF4	88.5558	92.8834	102.421	102.518	97.3184	99.102		1.08257	1.12951
ILMN_1787280	C1ORF135	174.513	174.769	135.351	154.42	145.268	132.993		0.796667	0.829622
ILMN_1790136	C20ORF20	1021.71	1052.89	895.47	903.956	1089.62	966.391		0.991044	0.867363
ILMN_3196690	C22ORF27	134.558	132.587	125.583	120.279	125.912	142.453		1.00456	0.920334
ILMN_2179533	C4A	98.1888	97.6637	90.0956	91.4378	97.4482	92.5051		0.969879	0.926888
ILMN_1746819	C5	353.307	443.568	209.714	184.13	185.105	256.343		0.553974	0.494236
ILMN_1761762	C6ORF141	188.985	214.9	136.703	153.032	133.312	140.956		0.679075	0.717369
ILMN_1653001	CABLES1	173.065	156.004	126.427	117.135	116.178	120.196		0.718309	0.740154
ILMN_1683415	CAMK2D	152.312	146.418	133.639	132.981	133.415	137.517		0.906943	0.892511
ILMN_2393254	CAPNS1	787.51	763.742	910.845	889.003	944.745	1023.05		1.26852	1.16026
ILMN_1783627	CAST	231.323	250.795	187.062	193.32	225.435	162.871		0.805416	0.78898
ILMN_1803338	CCDC80	157.345	129.14	222.182	216.098	296.697	137.337		1.51503	1.52985
ILMN_1810069	CCNYL1	175.679	173.348	143.968	129.36	139.477	150.259		0.830123	0.783112
ILMN_2166524	CCNYL1	186.996	180.797	150.786	130.82	141.016	168.123		0.840522	0.765664
ILMN_1800540	CD55	159.699	134.687	113.315	106.278	129.972	142.046		0.924018	0.745936
ILMN_1760247	CD70	314.591	266.261	484.915	412.042	657.22	349.553		1.73327	1.54421
ILMN_1695423	CD9	324.225	286.227	246.506	222.478	245.52	299.536		0.892873	0.768257
ILMN_2338323	CDC25B	1101.62	952.949	757.917	717.118	795.519	720.474		0.737866	0.717931
ILMN_1779228	CDH2	2005.28	2158.58	3906.8	3625.74	4074.11	2820.43		1.65581	1.80903
ILMN_1716815	CEACAM1	115.884	109.569	98.3399	89.9898	132.928	174.719		1.36457	0.835336
ILMN_2392472	CENPA	307.034	290.859	271.338	264.645	249.467	212.248		0.772236	0.896452
ILMN_1741350	CEP70	125.644	127.767	115.544	111.371	109.734	113.982		0.882819	0.895443
ILMN_2224031	CETN3	467.634	429.027	337.132	340.933	353.308	397.227		0.837034	0.756211
ILMN_1691647	CGB5	96.5755	93.6586	117.77	150.16	125.732	110.525		1.24193	1.40842
ILMN_1746801	CGN	160.438	149.498	132.927	125.591	119.795	139.964		0.838105	0.834104
ILMN_1674231	CHAF1B	328.169	345.765	282.396	282.588	293.474	237.174		0.787389	0.838338
ILMN_1741176	CHMP2B	730.397	710.096	401.22	528.013	556.018	702.983		0.874007	0.64508
ILMN_1748844	CNKSR3	291.005	262.45	199.638	218.596	166.765	203.271		0.668593	0.755679
ILMN_1653028	COL4A1	1189.35	955.21	1927.61	2777.11	3337.04	2142.89		2.55527	2.19379
ILMN_1706505	COL5A1	775.467	1178.41	2202.81	2523.78	2616.16	847.793		1.77286	2.41908
ILMN_1736002	COPS5	1529.76	1410.76	1284.15	1165.91	1159.39	1406.33		0.872539	0.833205
ILMN_2084836	CORO2B	89.206	96.5915	105.154	106.987	114.737	104.974		1.18253	1.14178
ILMN_1694432	CRIP2	199.652	168.3	318.904	248.159	275.193	245.284		1.41453	1.54114
ILMN_1789541	CRMP1	98.3404	108.485	137.003	125.806	120.138	120.103		1.16157	1.27068
ILMN_1720484	CRTAP	177.82	190.024	237.637	271.233	175.655	182.046		0.972424	1.38339
ILMN_1782788	CSDA	4867.21	5031.38	5572.93	5562.07	5491.59	3156.43		0.873662	1.12491
ILMN_2376455	CSF2RA	113.217	108.26	98.8366	96.6075	99.494	113.945		0.96371	0.882459
ILMN_1725090	CTHRC1	120.114	120.559	173.359	186.158	137.518	295.767		1.8003	1.4938
ILMN_2117508	CTHRC1	90.9092	93.1515	108.942	110.22	102.273	150.809		1.37499	1.1907
ILMN_1748352	CTSL2	267.775	251.059	201.543	185.95	216.944	167.554		0.741081	0.746854
ILMN_1759766	CTXN1	456.495	559.579	1149.01	845.335	657.991	656.259		1.29346	1.96279
ILMN_1714167	CYB5A	658.609	673.317	448.432	450.989	451.159	624.379		0.807506	0.675279
ILMN_2312194	CYB5A	435.565	421.994	280.063	273.252	301.207	378.936		0.793116	0.645221
ILMN_1809384	CYP4F12	93.1014	92.449	85.2911	86.3632	92.0166	90.7758		0.985136	0.925109
ILMN_3251260	CYP4F3	98.4953	96.6326	88.0755	91.6753	90.4806	91.2388		0.931283	0.921195
ILMN_1733851	DACT3	96.1752	111.443	130.641	122.967	116.893	111.851		1.10175	1.22151
ILMN_1769926	DBN1	546.414	607.114	721.07	737.033	911.225	790.621		1.47534	1.26404
ILMN_1669905	DCP2	241.224	226.457	295.222	303.062	233.132	322.057		1.18711	1.27926
ILMN_1694530	DDA1	1117.02	1010.59	757.458	861.213	853.5	841.614		0.796722	0.760793
ILMN_1660817	DDB2	217.238	199.898	239.815	243.832	195.901	217.089		0.99006	1.15945
ILMN_1760147	DDX12	139.775	139.783	110.067	116.074	112.206	106.964		0.783989	0.808925
ILMN_1765326	DGKD	189.34	198.54	222.682	231.928	251.007	217.097		1.20683	1.17204
ILMN_1807455	DHRS7	856.553	942.549	1211.22	1104.77	1131.11	1442.85		1.43069	1.2873
ILMN_1736704	DIXDC1	105.823	99.4808	122.92	115.213	138.783	119.641		1.25874	1.15991
ILMN_2398159	DKK3	343.268	366.244	573.011	933.595	988.986	540.491		2.15567	2.12344
ILMN_2415898	DNAJB14	224.083	237.967	198.545	191.486	189.833	229.226		0.906956	0.844131
ILMN_1752455	DOCK5	154.314	158.524	128.425	129.656	165.95	161.164		1.04563	0.824966
ILMN_1706498	DSE	307.155	299.161	416.969	431.456	551.03	439.229		1.63324	1.39931
ILMN_1666546	DUSP14	571.082	577.442	805.002	732.426	771.484	678.3		1.2623	1.33861
ILMN_1777233	E2F2	236.473	246.558	192.942	184.096	177.393	168.161		0.715388	0.780566
ILMN_1768127	EBNA1BP2	3154.95	3064.75	2662.92	2364.68	2536.9	2013.18		0.73156	0.808336
ILMN_1717173	ECT2	1447.91	1561.6	1206.26	1069.33	1054.35	1122.06		0.72318	0.756132
ILMN_1749892	EGLN1	210.689	212.575	241.859	256.62	254.822	213.963		1.10755	1.1777
ILMN_2330410	EIF3C	129.619	130.541	117.893	118.386	120.702	124.753		0.943478	0.908204
ILMN_1769201	ELF3	473.076	282.736	170.74	145.648	152.811	215.926		0.487868	0.418605
ILMN_1692335	ELK3	107.253	112.341	132.872	130.912	141.292	112.837		1.15727	1.20124
ILMN_1797074	EMG1	701.771	595.479	506.808	499.446	465.123	538.797		0.773884	0.775682
ILMN_1729455	EML1	413.433	428.916	564.224	564.232	594.217	434.794		1.2216	1.33965
ILMN_2411745	EML1	231.752	251.554	300.659	302.872	320.634	242.366		1.16489	1.24875
ILMN_2359456	ERGIC3	324.203	326.168	380.448	374.823	342.668	336.054		1.04359	1.16129
ILMN_1665510	ERRFI1	979.466	801.271	484.296	488.082	548.401	1023.75		0.882864	0.546054
ILMN_1742145	ESPL1	138.287	134.631	128.232	127.811	126.071	124.138		0.916791	0.93817
ILMN_1651628	EXOC6	236.957	237.847	201.297	193.025	191.639	181.726		0.786356	0.830494
ILMN_1721713	EXOSC9	359.073	375.027	313.63	315.222	310.405	311.603		0.847307	0.85663
ILMN_1791531	FA2H	113.732	120.518	96.0041	103.102	95.1175	116.405		0.902975	0.849971
ILMN_2163306	FAM120A	2356.6	2419.44	2167.1	2046.27	2247.82	2083.34		0.906852	0.882188
ILMN_1708143	FAM127A	562.627	593.402	763.844	964.522	738.393	1087.78		1.57969	1.49509
ILMN_3271098	FAM176A	151.377	163.138	220.225	266.922	192.356	162.785		1.12917	1.54888
ILMN_1733799	FAM195B	196.879	188.738	238.892	234.257	232.071	192.022		1.09978	1.227
ILMN_1811373	FAM20B	525.306	551.65	474.766	446.918	448.075	487.604		0.868819	0.855823
ILMN_3238797	FAM72A	162.331	152.077	135.997	133.381	128.417	137.968		0.847258	0.856776
ILMN_3243986	FAM72B	147.595	144.254	131.464	124.238	136.079	130.63		0.913859	0.876144
ILMN_1719870	FAM72D	441.331	368.856	324.677	303.463	265.257	263.75		0.652945	0.775303
ILMN_1652280	FBXO32	138.309	131.635	275.645	197.852	160.618	237.525		1.4749	1.75405
ILMN_1755834	FEN1	400.083	384.598	312.202	279.074	319.913	277.141		0.760888	0.753524
ILMN_1695290	FERMT2	847.647	972.242	1239.42	1340.58	1752.88	1280.14		1.6666	1.41767
ILMN_2355831	FHL2	1680.37	1455.17	2381.87	2423.44	2573.56	2538.5		1.63036	1.53253
ILMN_1668411	FHL2	725.344	703.149	1059.93	1080.6	1392.31	1084.82		1.73409	1.49846
ILMN_1761322	FHOD3	132.769	127.238	159.535	173.846	165.961	146.398		1.20134	1.2822
ILMN_1715748	FLNC	104.874	107.113	187.971	298.58	159.864	144.242		1.43455	2.29519
ILMN_2395214	FMNL3	87.7277	91.6505	102.753	100.459	96.5239	96.2689		1.07478	1.13287
ILMN_2362581	FNDC3A	146.724	210.84	281.292	316.16	295.196	375.721		1.87636	1.6709
ILMN_1705111	FNDC3A	169.56	201.571	273.303	326.481	315.381	336.912		1.75758	1.6161
ILMN_1704418	FOXD1	352.411	394.741	615.715	606.925	800.601	488.485		1.72533	1.6364
ILMN_1682495	FOXP1	134.252	132.474	180.352	176.088	174.14	140.246		1.17869	1.33635
ILMN_1738179	FOXP1	91.881	99.1055	106.622	115.689	102.07	98.8857		1.0522	1.16402
ILMN_2201678	FSTL1	173.837	191.599	240.036	234.065	372.217	185.844		1.52711	1.29736
ILMN_1790228	FURIN	107.419	106.655	115.21	118.366	144.346	124.026		1.25364	1.0911
ILMN_1796537	FYB	189.097	183.398	157.454	157.139	147.787	184.083		0.890937	0.844556
ILMN_1670439	FYTTD1	294.649	306.471	346.665	375.53	352.735	297.916		1.0824	1.20142
ILMN_1729905	GAL3ST1	121.048	114.827	101.982	107.204	93.0567	103.441		0.833058	0.886852
ILMN_1653687	GALNT9	105.301	109.618	131.544	130.01	124.742	163.53		1.3413	1.21699
ILMN_1809034	GATC	193.177	185.705	163.388	153.152	181.921	160.901		0.904827	0.835459
ILMN_1730575	GCLC	714.539	545.939	394.74	360.688	360.955	345.85		0.560743	0.599319
ILMN_1652631	GLIPR2	262.836	284.721	679.473	815.203	686.805	399.472		1.98386	2.72972
ILMN_1703565	GLTSCR2	2897.82	3262.14	3706.22	4429.58	3202.59	2620.52		0.945316	1.32076
ILMN_3242205	GMPS	796.385	761.536	667.556	634.332	606.349	630.347		0.793811	0.835657
ILMN_1778673	GOLGA7	944.411	772.769	537.599	619.776	876.882	1189.07		1.20311	0.673997
ILMN_1706764	GOLPH3L	131.145	143.251	122.3	117.103	120.367	146.685		0.973238	0.872475
ILMN_1769702	GPAA1	287.269	297.806	350.017	393.399	365.725	289.01		1.11906	1.27064
ILMN_1656422	GPR87	92.7955	93.1137	105.327	103.597	124.004	113.934		1.27986	1.12379
ILMN_1682599	GPRC5A	265.368	237.48	178.931	179.462	189.443	349.099		1.07099	0.712727
ILMN_1699854	GRIN3B	96.7301	108.321	124.128	143.96	127.119	119.644		1.20343	1.30742
ILMN_1750130	GSPT1	4661.57	4446.37	3956.72	3858.77	4685.17	4002.29		0.953834	0.858097
ILMN_1802690	GULP1	146.811	130.187	115.955	110.588	109.294	131.792		0.870349	0.817851
ILMN_2106331	H3F3A	4838.83	4560.55	5609.18	5556.89	6067.01	4503.5		1.1246	1.18796
ILMN_1696183	HBQ1	209.704	211.587	249.22	268.028	191.384	258.228		1.06722	1.22777
ILMN_1651496	HIST1H2BD	452.358	386.423	652.694	962.908	1010.6	576.297		1.89191	1.92613
ILMN_1758623	HIST1H2BD	255.716	243.036	356.462	428.815	518.025	306.582		1.65334	1.57448
ILMN_1653042	HSD3B7	109.57	106.33	95.9167	97.4841	103.374	121.167		1.04003	0.895788
ILMN_1789074	HSPA1A	1645.67	1631.96	1241.68	1285.51	1750.16	1254.06		0.916586	0.771045
ILMN_1660436	HSPA1B	1321.8	1510.99	965.825	988.422	1319.7	1022.97		0.826982	0.689867
ILMN_1747078	HYLS1	306.357	312.23	271.014	248.474	234.242	250.821		0.784146	0.839797
ILMN_1723021	ICMT	219.965	235.274	282.895	299.235	303.492	251.059		1.21815	1.27873
ILMN_1721669	IDH3B	1709.28	1768.63	1441.23	1549.77	1474.78	1682.94		0.907938	0.859998
ILMN_2373632	IDH3B	1006.8	997.621	874.01	907.271	845.591	880.788		0.861285	0.888675
ILMN_1740319	IFI27L2	179.911	182.738	225.737	227.395	224.777	351.061		1.58787	1.24951
ILMN_1745374	IFI35	188.775	163.057	140.522	122.56	146.175	168.514		0.894429	0.747749
ILMN_2239754	IFIT3	116.055	117.573	108.294	101.49	108.921	133.691		1.03845	0.897941
ILMN_2062468	IGFBP7	375.334	604.184	940.093	987.51	1727.78	1114.71		2.90193	1.96791
ILMN_1724181	IL15	129.512	136.378	191.187	205.699	162.162	169.88		1.24879	1.49267
ILMN_1778010	IL32	129.322	111.969	159.295	175.866	181.499	215.057		1.64348	1.38903
ILMN_2358980	ILK	226.834	205.431	274.043	290.136	360.565	311.004		1.55361	1.30517
ILMN_1667239	INPP1	320.848	385.2	453.377	457.394	522.621	508.123		1.45988	1.28995
ILMN_1764177	JARID2	175.712	160.01	240.736	266.055	305.383	234.077		1.60687	1.50956
ILMN_1811535	JUB	114.234	110.895	99.3166	96.6406	93.9175	118.187		0.942144	0.870421
ILMN_1673769	KCNG1	229.411	280.185	453.6	452.61	406.228	346.051		1.47622	1.77829
ILMN_2134555	KCTD3	486.509	450.81	361.691	335.549	420.023	368.969		0.841754	0.743867
ILMN_1800220	KCTD3	381.923	396.72	310.236	274.458	349.542	312.934		0.850809	0.750914
ILMN_2163070	KHDC1	96.1119	97.4819	102.021	100.334	108.413	97.096		1.06155	1.04525
ILMN_2355033	KIAA1147	347.315	288.594	238.472	236.972	260.064	366.187		0.984812	0.74766
ILMN_1719876	KIAA1804	179.091	151.112	117.294	129.585	113.595	120.524		0.709014	0.747658
ILMN_2119224	KIFAP3	262.528	265.873	326.453	332.991	370.793	349.775		1.36368	1.248
ILMN_1660582	LIG3	177.609	195.773	158.929	144.079	165.722	163.861		0.8827	0.811525
ILMN_1733559	LOC100008589	1057.34	1059.32	1532.27	1681.72	1294.39	1537.36		1.33784	1.51842
ILMN_3251587	LOC100008589	3998.69	4106.01	6391.85	6885.06	4972.2	5977.69		1.35106	1.63817
ILMN_3191393	LOC100128892	182.007	147.241	271.565	284.437	385.227	164.675		1.67018	1.68871
ILMN_3258914	LOC100129652	100.219	97.732	92.5641	93.2763	100.336	93.7861		0.98066	0.938821
ILMN_3231944	LOC100130516	2211.36	2055.38	1482.66	1296.23	2400.43	1579.37		0.93275	0.65129
ILMN_3241091	LOC100130886	408.184	428.694	552.9	532.466	547.084	374.795		1.10157	1.29692
ILMN_3249578	LOC100132394	1130.89	1075.71	1535.51	1791.06	1441.91	1417.84		1.29599	1.50755
ILMN_3243644	LOC100132564	908.364	1077.85	1753.26	2053.15	1191.4	1761.69		1.48679	1.91641
ILMN_3237584	LOC100133489	146.693	146.555	128.642	124.287	128.497	130.042		0.881643	0.862513
ILMN_3246663	LOC100133639	98.7516	101.339	92.2665	92.6352	93.0165	97.5259		0.95228	0.92409
ILMN_1747423	LOC389901	123.312	118.117	107.226	99.5843	115.461	116.172		0.959427	0.85661
ILMN_1668629	LOC401115	2390.18	2710.77	3517.87	3602.83	3635.06	3812.54		1.46004	1.39595
ILMN_2051684	LOC401152	129.927	131.854	145.056	138.854	119.61	130.625		0.955891	1.08453
ILMN_1655842	LOC442597	120.92	123.499	168.991	150.012	137.974	124.204		1.07266	1.30515
ILMN_1702797	LOC541469	118.085	116.725	103.226	109.452	117.727	112.108		0.978814	0.905744
ILMN_3293146	LOC642975	1700.91	1613.82	1306.33	1465.03	1481.81	1556.51		0.916611	0.836074
ILMN_3276822	LOC645726	148.103	150.104	135.107	139.895	144.451	115.224		0.870785	0.922183
ILMN_1790971	LOC652324	132.639	144.935	162.629	167.335	167.569	144.136		1.12296	1.18874
ILMN_1810953	LOC653496	135.963	132.264	157.554	160.707	162.394	135.576		1.11089	1.18654
ILMN_1701882	LOC653820	297.568	275.482	211.513	195.709	189.033	203.291		0.684625	0.710621
ILMN_3305849	LOC728431	241.221	244.28	283.382	318.766	292.994	226.17		1.06934	1.24026
ILMN_3225075	LOC728530	98.299	100.642	92.0375	90.0649	87.6086	92.5715		0.905695	0.915357
ILMN_3299365	LOC729406	785.02	695.418	1062.26	984.222	995.588	604.368		1.08073	1.38235
ILMN_1763409	LRRC8D	198.005	205.497	177.116	175.135	183.217	173.229		0.883378	0.872984
ILMN_2355225	LSP1	129.46	139.793	170.257	164.523	153.734	160.965		1.16879	1.24337
ILMN_2306189	MAGED1	316.376	396.355	511.132	454.536	456.811	633.107		1.52922	1.35489
ILMN_1679391	MAMDC2	86.913	87.5471	93.7825	91.7851	97.6558	96.3083		1.1118	1.06367
ILMN_1768510	MAN2B2	392.399	396.877	519.135	457.601	531.256	420.796		1.20623	1.23751
ILMN_1703244	MAP1LC3B	288.292	344.446	457.706	455.198	394.328	685.462		1.70654	1.44278
ILMN_1810176	MAP3K7	386.479	390.134	298.57	309.844	397.438	409.214		1.03868	0.783419
ILMN_1764082	MBOAT1	115.29	117.173	104.77	105.496	108.407	118.451		0.975892	0.904513
ILMN_1777853	MBOAT2	135.508	143.802	176.583	176.354	232.118	178.256		1.46925	1.2636
ILMN_2413898	MCM10	544.832	543.297	445.13	416.278	381.504	321.472		0.646041	0.791641
ILMN_1663195	MCM7	3880.29	4104.64	3110.18	3138.25	3096.53	2123.36		0.653718	0.782527
ILMN_2407124	MCM8	249.693	260.523	207.654	199.696	191.088	191.669		0.750184	0.798387
ILMN_2349393	MDK	114.351	122.886	162.825	176.555	146.907	137.409		1.19845	1.43055
ILMN_3241441	MEGF6	116.386	113.653	102.855	98.0635	99.6639	107.118		0.898896	0.873407
ILMN_1731184	MELK	628.864	638.093	503.888	526.901	514.324	412.628		0.731637	0.813594
ILMN_1801610	METRNL	101.887	101.79	109.412	108.401	108.638	100.53		1.02695	1.0694
ILMN_1658989	MEX3B	192.703	197.94	321.6	256.306	306.132	214.275		1.33218	1.47937
ILMN_1719471	MSH3	274.975	279.81	240.733	221.061	216.685	271.414		0.879798	0.832383
ILMN_1659895	MSN	1150.18	1150.87	1524.28	1519.78	2225.83	2336.29		1.98263	1.3229
ILMN_2332553	MSRB3	192.054	184.207	211.97	228.801	249.9	197.919		1.19018	1.17145
ILMN_1773763	MTA2	338.714	371.491	282.18	291.876	355.385	357.884		1.00431	0.808295
ILMN_2346727	MTUS1	175.093	151.396	104.454	114.944	99.01	126.476		0.690637	0.671994
ILMN_1743836	MXRA7	230.693	243.708	359.627	367.127	337.99	250.556		1.24061	1.53194
ILMN_2198413	MYEOV	296.794	260.479	192.801	201.841	203.484	215.932		0.752623	0.708168
ILMN_1656111	MYLIP	173.766	182.138	151.661	138.163	168.394	152.244		0.900913	0.814332
ILMN_2181125	NAPB	144.397	148.179	169.689	175.364	150.857	172.8		1.10623	1.17936
ILMN_2334385	NCKAP5	97.7755	98.0743	110.869	108.78	97.9932	106.41		1.04367	1.12152
ILMN_2305225	NDRG4	532.441	514.568	363.605	395.998	354.438	746.267		1.05128	0.725498
ILMN_1807283	NDST1	188.194	171.062	261.511	268.22	300.248	202.477		1.39935	1.47453
ILMN_1757697	NEIL3	254.679	215.74	172.373	181.299	170.095	162.908		0.707887	0.751824
ILMN_1707312	NFIL3	227.836	192.483	174.731	145.882	173.06	176.905		0.832619	0.762785
ILMN_1728779	NGLY1	296.851	320.57	268.5	259.179	273.278	250.591		0.84848	0.854651
ILMN_1715864	NHS	149.751	137.023	182.037	199.195	147.702	146.906		1.02732	1.32938
ILMN_1777066	NIF3L1	1024.1	1138.25	874.092	802.753	796.353	957.743		0.811199	0.775473
ILMN_1680774	NLRP1	110.785	140.093	203.385	253.88	191.902	114.106		1.21975	1.82266
ILMN_1806634	NNT	200.481	198.23	234.969	234.318	233.065	279.88		1.28651	1.17701
ILMN_1658926	NOTCH3	98.5848	98.586	104.119	105.799	96.8151	94.3168		0.969372	1.06465
ILMN_1716678	NPC2	5687.66	5833.46	8051.18	7666.99	8599.42	7137.02		1.36588	1.36429
ILMN_1724194	NPEPL1	302.714	312.335	424.125	498.17	343.017	329.202		1.09295	1.49955
ILMN_1800160	NR0B1	560.355	490.56	405.312	349.683	314.498	307.738		0.59209	0.718417
ILMN_1811303	NR5A2	202.286	189.909	147.184	141.773	132.031	190.541		0.822481	0.736769
ILMN_1676280	NSUN3	135.111	126.828	116.415	116.374	128.764	131.633		0.994113	0.888712
ILMN_1689318	NUAK1	1360.38	1457.34	1866.51	1804.44	2381.5	1292.28		1.30381	1.30281
ILMN_2079786	NUAK1	749.37	697.377	957.728	977.067	1116.37	743.416		1.28549	1.33734
ILMN_2331266	NUMB	576.963	553.05	498.18	485.282	485.598	600.853		0.961449	0.870309
ILMN_1670079	OMA1	190.468	178.807	154.067	138.994	142.295	161.969		0.823948	0.793612
ILMN_2209180	P15RS	630.014	564.624	476.758	432.846	533.12	598.164		0.946968	0.761405
ILMN_3241262	PABPC4L	99.5116	100.348	112.858	114.471	112.869	108.463		1.10743	1.13744
ILMN_1773760	PAICS	2008.11	1915.52	1664	1573.22	1446.13	1277.66		0.694199	0.825055
ILMN_1710495	PAPLN	168.035	158.894	119.802	104.881	97.5375	109.827		0.63428	0.687254
ILMN_1745154	PARD6B	116.207	113.864	104.201	100.203	102.046	107.481		0.910709	0.888441
ILMN_1806651	PARP8	182.211	174.408	208.828	214.733	219.879	150.906		1.03972	1.18771
ILMN_3307892	PARVA	257.394	256.574	305.701	329.595	386.717	294.509		1.32543	1.23606
ILMN_1673673	PBK	1075.74	1030.77	776.212	726.612	833.708	606.26		0.683579	0.713417
ILMN_1728498	PCBP4	116.196	117.995	128.347	130.345	136.911	133.863		1.15621	1.10462
ILMN_2227757	PCDHB2	258.996	280.411	323.572	332.117	423.076	337.882		1.41073	1.21557
ILMN_1814710	PCDHB5	95.5439	95.2748	106.35	108.803	111.751	96.443		1.09106	1.12753
ILMN_1683023	PDGFC	177.114	208.149	360.332	335.709	376.497	216.237		1.53852	1.80667
ILMN_1776582	PDK3	155.231	159.552	143.49	139.009	158.444	145.577		0.965807	0.897437
ILMN_2058795	PGCP	96.3936	97.8232	108.85	110.504	114.094	104.412		1.12506	1.12943
ILMN_1794165	PGD	3446.54	3413.48	2292.94	2698.64	2460.64	2999.59		0.795951	0.727633
ILMN_1803464	PHTF1	175.524	176.058	201.538	202.356	155.128	174.761		0.938297	1.14879
ILMN_2074044	PLS1	284.666	262.334	190.778	200.127	186.383	194.908		0.697059	0.714635
ILMN_1759206	PLS1	177.23	155.311	125.257	135.817	133.177	134.499		0.804941	0.785088
ILMN_1703433	PLSCR3	886.074	1173.13	1550.13	1555.25	1496.18	2010.71		1.70304	1.50805
ILMN_1734276	PMEPA1	1660.99	1528.74	3025.64	2501.58	2715.3	2078.6		1.50292	1.73282
ILMN_2309156	PMEPA1	843.243	809.057	1692.48	1260.22	1337.23	1171.93		1.51859	1.78702
ILMN_1675656	PPFIBP2	440.479	445.618	227.502	172.86	192.392	234.142		0.481364	0.451827
ILMN_1659888	PPP1R14B	1294.54	1062.18	1643.67	1605.92	1668.91	971.605		1.12042	1.37886
ILMN_2196097	PPP2CA	1051.54	1148.26	897.238	832.557	862.882	954.21		0.826027	0.786343
ILMN_1722858	PPP2CA	3764.18	3924.68	3244.81	3246.16	3837.67	3349.08		0.934698	0.844206
ILMN_1655077	PRDM1	137.8	151.46	190.634	175.27	165.145	163.701		1.13685	1.26496
ILMN_2396947	PSMC3IP	174.786	168.411	154.819	145.659	140.112	148.324		0.840437	0.875524
ILMN_2396948	PSMC3IP	156.057	150.362	135.969	121.917	120.018	128.076		0.809654	0.841609
ILMN_1785699	PTHLH	124.586	128.777	150.311	164.227	175.678	230.817		1.6044	1.24145
ILMN_2374687	PTPN13	147.117	143.822	174.842	162.302	150.005	137.852		0.989407	1.15881
ILMN_2400030	PTPN2	167.917	175.212	152.147	138.355	162.729	160.123		0.940908	0.846627
ILMN_1717294	PTPN3	145.093	156.983	134.698	127.633	137.759	155.146		0.96964	0.86843
ILMN_2042771	PTTG1	2915.59	2858.36	2374.89	2195.84	2605.47	1890.78		0.778713	0.791613
ILMN_1741727	QPCT	539.372	511.765	702.302	815.81	956.404	669.117		1.54644	1.44426
ILMN_1793433	RAB10	3932.33	3717.57	3266.63	3377.57	3019.69	3725.91		0.881791	0.868534
ILMN_1788180	RAB13	498.673	479.154	610.578	599.979	427.146	403.722		0.849707	1.23801
ILMN_1741632	RAB3IL1	288.968	270.899	207.954	193.666	216.943	253.626		0.8405	0.71735
ILMN_1776519	RAP1GAP	527.615	482.824	313.687	327.363	309.704	254.639		0.558513	0.634427
ILMN_1701613	RARRES3	106.288	101.643	88.0262	88.1431	91.9873	104.655		0.945709	0.84725
ILMN_1725312	RASA1	546.586	560.8	894.159	757.263	738.235	513.502		1.13035	1.49128
ILMN_1779517	RASEF	225.273	176.862	128.652	149.465	145.771	188.861		0.832139	0.691601
ILMN_2370365	RFC4	729.923	684.02	606.223	600.304	464.414	538.424		0.709249	0.853307
ILMN_1800787	RFTN1	369.802	382.219	585.498	566.307	491.268	477.749		1.28855	1.53161
ILMN_1753143	RHPN2	2472.57	1957.1	1779.57	1482.05	1592.57	822.29		0.545155	0.736311
ILMN_3308335	RNU6-1	960.158	1061.79	1236.1	1382.59	1174.22	1441		1.29341	1.29514
ILMN_1762747	RPL15	2562.71	2635.77	3085.77	3495.03	2411.05	2907.6		1.02312	1.26591
ILMN_2219131	RPS15	317.396	297.49	224.822	248.037	214.732	272.988		0.793187	0.769018
ILMN_1758827	RTN4IP1	276.07	267.506	234.159	214.518	221.054	215.229		0.802616	0.825418
ILMN_1757781	SAP30L	543.868	509.805	602.753	597.291	539.469	408.473		0.899655	1.13892
ILMN_1800543	SCFD1	577.03	614.064	523.56	475.79	574.076	462.349		0.870146	0.839019
ILMN_2065773	SCG5	132.877	148.345	378.116	336.016	302.138	364.151		2.36926	2.53939
ILMN_1670306	SCGB3A2	97.2542	95.2207	91.0116	90.5788	92.6092	95.4336		0.976973	0.94345
ILMN_1815308	SDC1	1185.92	1444.47	2183.82	2193.54	2678.5	2214.2		1.86007	1.66415
ILMN_1695475	SEMA3C	388.767	433.058	573.506	531.746	603.683	377.771		1.19424	1.34487
ILMN_1687824	SEPHS2	393.965	398.398	334.426	333.434	346.51	436.687		0.988432	0.842872
ILMN_1800626	SESN1	152.111	141.577	171.185	195.087	195.756	194.617		1.32921	1.24714
ILMN_1754126	SH2D5	139.895	154.185	113.71	120.747	121.837	130.855		0.859263	0.797256
ILMN_1702835	SH3BGRL	436.769	476.332	671.367	618.926	571.531	405.144		1.06962	1.41309
ILMN_2216918	SHPK	418.203	437.481	351.725	319.474	371.816	364.855		0.860915	0.7844
ILMN_1739083	SIRT1	237.969	253.852	215.886	198.951	181.936	244.413		0.86688	0.843474
ILMN_1791002	SKP2	174.459	186.81	144.084	147.152	168.358	146.513		0.871573	0.806147
ILMN_2050911	SLC22A4	138.927	147.452	226.215	223.504	153.666	140.131		1.02591	1.57037
ILMN_3240838	SLC25A6	1122.94	1134.62	1483.26	1817.01	1377.12	1374.63		1.2189	1.46188
ILMN_1656129	SLC39A10	206.972	227.349	298.293	296.844	216.066	232.792		1.03347	1.37027
ILMN_1742705	SLC39A11	139.82	133.881	164.868	154.913	145.999	124.624		0.988755	1.16836
ILMN_1735156	SLC4A11	117.998	117.099	103.02	104.675	98.3574	105.489		0.867077	0.883449
ILMN_1682738	SMAD3	845.672	808.871	611.284	512.632	606.444	842.452		0.875708	0.679291
ILMN_1785618	SMTN	139.328	131.401	158.503	166.263	228.357	170.318		1.4726	1.1996
ILMN_1655740	SNAI2	118.524	127.481	189.86	192.531	202.969	138.804		1.38929	1.5544
ILMN_2082585	SNAI2	153.557	147.736	299.839	314.808	312.278	187.79		1.65974	2.04003
ILMN_3238435	SNORA12	250.347	190.742	405.56	428.531	272.949	419.094		1.56894	1.89098
ILMN_3308753	SNORD114-1	104.055	103.677	115.817	113.764	110.182	110.83		1.06393	1.10518
ILMN_3242315	SNORD3D	161.408	208.503	256.36	302.518	180.844	306.769		1.31819	1.51084
ILMN_1725108	SNX25	128.947	130.908	117.299	112.452	125.546	121.103		0.949181	0.884154
ILMN_1815745	SOX4	348.759	347.243	505.396	501.674	521.739	369.495		1.2805	1.44693
ILMN_1712773	SPAG1	120.13	119.682	109.285	110.229	112.589	119.798		0.969035	0.91536
ILMN_1667948	SPATA18	125.667	115.617	141.1	140.748	145.63	172.547		1.31868	1.16812
ILMN_2357134	SPHK1	94.546	99.5515	128.298	136.02	162.51	141.654		1.56707	1.36178
ILMN_1691860	SPRY1	104.062	104.329	94.1376	92.4358	95.8971	112.476		0.99991	0.895301
ILMN_2329914	SPRY1	128.006	137.407	108.139	109.492	105.613	127.477		0.878218	0.819972
ILMN_1662618	SQSTM1	9579.11	9400.56	7247.46	6302.26	6817.55	9872.97		0.87939	0.713907
ILMN_1709486	SRPX	160.973	262.897	548.72	407.216	460.757	447.018		2.14164	2.25526
ILMN_1758164	STC1	127.497	149.814	260.142	273.114	625.061	304.47		3.35195	1.92296
ILMN_1738449	STIM2	126.246	129.442	116.557	112.902	118.881	126.57		0.959961	0.897417
ILMN_1684402	STXBP5	166.787	170.539	214.749	199.203	245.843	205.512		1.33804	1.22716
ILMN_1697793	SYNJ2BP	375.623	341.084	247.029	237.85	405.848	411.005		1.13973	0.676536
ILMN_1778668	TAGLN	702.957	609.553	2123.85	2185.58	6489.69	6113.43		9.6023	3.28335
ILMN_2400935	TAGLN	179.794	152.159	398.049	387.379	1150.57	1002.36		6.48565	2.36609
ILMN_3244286	TANC2	155.128	153.004	190.357	206.499	244.549	198.224		1.43696	1.28794
ILMN_1769876	TBC1D2	166.265	163.041	132.012	123.708	160.861	180.101		1.0354	0.776546
ILMN_1725183	TBCE	992.046	913.133	733.568	747.357	761.412	948.623		0.897572	0.777315
ILMN_2357770	TCEA1	1187.95	1204.46	978.973	944.275	795.426	984.238		0.743878	0.803893
ILMN_1698139	TCEA1	212.376	218.384	175.985	190.263	174.681	193.984		0.855848	0.850238
ILMN_1814194	TCF4	108.812	116.806	157.866	144.342	155.423	109.113		1.1725	1.33947
ILMN_1705301	TEAD4	606.277	631.176	500.922	538.267	569.011	403.076		0.785554	0.83978
ILMN_1683891	TFAP2C	173.699	169.212	136.012	130.537	132.635	160.156		0.853838	0.777311
ILMN_2096784	TFAP2C	291.159	269.231	188.915	179.918	168.246	252.377		0.750589	0.658172
ILMN_1672571	TFIP11	253.027	277.37	352.8	340.026	379.528	293.619		1.26914	1.30624
ILMN_1663866	TGFBI	6922.31	7139.36	11310.2	12021.9	14154.3	7330.31		1.52788	1.65927
ILMN_1784287	TGFBR3	275.674	218.636	153.98	143.424	139.195	199.927		0.68605	0.601654
ILMN_1705750	TGM2	341.205	420.529	732.799	637.761	1072.27	907.054		2.59844	1.79926
ILMN_1779875	THY1	93.7134	108.832	138.176	141.32	135.728	110.759		1.21695	1.37992
ILMN_1721876	TIMP2	847.077	1036.89	1543.08	1631.8	2101.53	1144.87		1.72317	1.68521
ILMN_1730117	TMC5	121.921	116.936	101.278	101.972	99.3527	104.972		0.855427	0.85093
ILMN_1654939	TMED2	1727.28	1759.02	1532.18	1341.78	1665.34	2343.68		1.14994	0.824358
ILMN_1704024	TMEM160	681.995	832.558	1091.23	988.84	939.271	715.499		1.09258	1.37339
ILMN_1702973	TMEM166	287.818	357.822	530.615	641.664	527.949	364.156		1.38174	1.81569
ILMN_1688848	TMEM44	202.608	184.023	286.773	252.751	197.273	213.858		1.06337	1.39545
ILMN_2388070	TMEM44	146.556	158.234	189.283	183.499	153.513	149.107		0.992876	1.22308
ILMN_1749930	TMEM48	206.62	213.397	176.259	192.157	191.922	174.018		0.871251	0.877145
ILMN_1798874	TMEM85	1824.62	1580.84	1261.94	1009.41	1555.32	1733.81		0.965839	0.666971
ILMN_1779182	TMEM98	467.947	486.121	595.432	647.992	821.087	626.647		1.51743	1.30329
ILMN_2414325	TNFAIP8	400.674	316.247	261.752	255.613	274.985	236.123		0.712921	0.72165
ILMN_2115991	TNNT1	155.79	167.952	201.966	185.592	168.826	189.601		1.10714	1.19712
ILMN_1789196	TPM2	3267.4	3360.47	4919.54	5129.74	7664.55	6057.91		2.07042	1.51621
ILMN_1757604	TPM2	2209.01	1881.3	3034.28	2950.94	4559.41	3883.34		2.06409	1.46327
ILMN_1712708	TRIM47	223.613	193.52	160.322	158.618	136.204	156.323		0.70128	0.7646
ILMN_1657509	TSEN54	139.254	143.123	116.129	126.596	131.04	125.239		0.907576	0.859577
ILMN_1799028	TSPAN5	292.735	295.79	383.279	479.521	418.392	323.398		1.26042	1.46604
ILMN_1730998	TSPAN6	344.494	354.547	430.639	422.084	342.564	376.655		1.02886	1.21985
ILMN_1779014	TSPYL1	325.318	310.763	366.008	415.932	356.021	346.386		1.10427	1.22931
ILMN_1743303	TTC1	303.605	282.397	250.312	229.91	281.751	285.745		0.968421	0.819488
ILMN_1680874	TUBB2B	398.8	557.059	913.715	752.937	471.666	404.228		0.916342	1.74362
ILMN_1717056	TXNRD1	3453.55	3180.84	2601.13	2392.93	2378.25	3059.79		0.819676	0.752754
ILMN_2324421	TXNRD1	2616.11	2302.52	1947.24	1780.66	1681.83	2124.65		0.77389	0.757913
ILMN_2301083	UBE2C	2938.27	2639.12	2291.88	2241.7	2251.93	1752.46		0.717968	0.81285
ILMN_2351611	UBQLN1	578.611	538.377	468.944	467.812	580.852	620.167		1.07523	0.838645
ILMN_1794914	UBTD1	173.991	190.37	214.537	237.413	274.051	199.863		1.30067	1.24039
ILMN_2366714	UCRC	166.132	191.213	236.69	235.313	159.425	222.093		1.06765	1.32086
ILMN_1798256	UPP1	1025.16	737.531	570.944	530.9	637.281	751.089		0.787642	0.625092
ILMN_1740742	UROD	675.358	674.22	783.636	810.182	718.796	1066.47		1.32283	1.18097
ILMN_1725862	USP3	826.222	823.108	696.726	622.322	683.132	587.889		0.770629	0.799747
ILMN_1714527	VAMP3	521.128	460.06	588.278	687.955	552.954	523.486		1.09708	1.3007
ILMN_1715647	VANGL2	116.855	118.269	158.372	139.008	132.968	140.874		1.16466	1.26478
ILMN_1768480	VGLL4	294.646	259.755	392.214	360.344	361.458	366.913		1.3138	1.35743
ILMN_2361862	VLDLR	159.89	161.913	201.831	190.01	192.805	193.299		1.19982	1.21764
ILMN_2406043	VPS24	492.447	529.755	688.905	615.933	525.403	642.828		1.14286	1.2765
ILMN_1697493	WDFY3	113.208	117.529	130.177	132.673	119.622	116.319		1.02256	1.13918
ILMN_1744240	WDR67	236.33	225.073	203.818	195.622	199.176	177.667		0.816735	0.865708
ILMN_1803939	YIPF6	567.486	585.521	490.42	476.633	518.99	875.1		1.20909	0.838723
ILMN_1677098	YPEL2	105.77	105.881	121.341	114.783	129.708	123.463		1.19617	1.11563
ILMN_1669286	YWHAZ	175.568	165.115	133.07	134.857	133.417	142.718		0.810533	0.786443
ILMN_1694466	ZBED1	501.479	519.307	414.66	370.313	584.032	413.734		0.977449	0.768989
ILMN_1761479	ZC3HC1	916.869	847.684	761.998	762.433	776.705	787.125		0.886247	0.863919
ILMN_2362457	ZDHHC16	216.181	204.43	277.259	296.393	255.854	209.523		1.10643	1.36385
ILMN_1720829	ZFP36	326.879	325.581	283.169	272.849	372.344	436.332		1.23943	0.852187
ILMN_1675448	ZFP36L1	1381.73	1449.21	1956.5	2194.67	1682.91	1706.72		1.19735	1.46636
ILMN_1662021	ZNF326	189.81	197.16	157.878	157.669	164.086	143.059		0.793718	0.81543
ILMN_1811997	ZNF364	610.878	634.772	492.577	510.042	545.307	538.785		0.870302	0.804896
ILMN_1660193	ZNF529	165.996	170.291	209.618	213.394	171.7	186.307		1.06459	1.25789
ILMN_1855746		157.256	148.261	128.485	134.737	112.474	122.656		0.769616	0.861563
ILMN_1827736		215.312	224.716	166.139	164.518	171.442	201.2		0.84686	0.751444
ILMN_1851540		91.7849	91.3502	97.7056	97.6902	91.4633	95.93		1.02325	1.06695
ILMN_1906423		87.2582	105.186	125.066	137.471	188.7	101.146		1.50613	1.36422
ILMN_1847308		221.008	233.339	263.717	256.081	238.207	245.647		1.06494	1.14405
ILMN_1862217		168.735	173.094	226.493	219.078	241.875	253.575		1.44941	1.30349
ILMN_1909073		131.491	123.095	137.827	147.794	128.56	132.016		1.02353	1.12191
ILMN_1875123		399.377	439.266	582.678	574.857	442.286	510.55		1.13616	1.38025
ILMN_1898723		269.511	300.216	360.69	339.036	408.594	372.531		1.37105	1.22818

## Sheet: FDR 0.1 RELB RNAi
		Normalised probe intensity (mean three biological replicates)							Ratios
Probe	Gene	siCtrl	siCtrl-2	siATG5	siULK1	siRELB	siRELB-2		RELB/NTC	ATG/NTC
ILMN_1755321	AAAS	146.931	144.468	129.453	130.432	130.722	132.175		0.902191	0.891856
ILMN_1653165	AAMP	228.984	205.631	239.149	243.88	253.222	265.297		1.19306	1.11139
ILMN_1662364	AARS	2672.87	2504.53	2348.96	1769.43	1804.71	2156.92		0.765178	0.795455
ILMN_1676278	ABCC2	642.58	626.645	404.634	433.761	423.632	479.981		0.711941	0.660556
ILMN_1788457	ABCC4	562.718	459.513	468.245	431.713	321.762	314.338		0.622267	0.880386
ILMN_2194009	ABCC4	692.038	595.608	563.041	544.958	411.134	336.579		0.580682	0.860484
ILMN_1706531	ABCC5	150.878	175.264	162.103	182.651	188.108	202.304		1.19706	1.05707
ILMN_1674032	ABCD3	175.109	181.222	165.217	153.163	150.936	153.176		0.853455	0.893497
ILMN_2330267	ABCE1	741.887	734.532	685.281	756.015	607.055	673.921		0.867624	0.976211
ILMN_1676846	ABCE1	727.851	687.837	680.516	733.337	549.717	614.624		0.822455	0.998703
ILMN_1781999	ABCF2	338.005	364.052	341.18	319.105	320.824	278.878		0.854207	0.940502
ILMN_1669201	ABCF2	166.126	162.264	156.336	155.956	147.577	151.882		0.911898	0.95098
ILMN_1789641	ABCG2	109.258	102.445	92.1556	94.7233	87.2727	97.7227		0.873842	0.882739
ILMN_2338268	ABHD11	125.636	130.932	124.288	132.154	116.695	113.848		0.898569	0.999514
ILMN_1741628	ABL2	95.999	92.4769	97.9976	101.192	99.1917	108.161		1.10015	1.05684
ILMN_1656940	ABLIM3	103.535	104.851	136.979	104.311	130.28	122.588		1.21346	1.1579
ILMN_1771348	ACN9	305.129	319.288	302.846	296.377	256.642	235.057		0.787452	0.959651
ILMN_2134039	ACN9	486.866	496.144	519.074	575.74	358.434	405.606		0.777245	1.11374
ILMN_1715543	ACOT1	226.254	234.299	262.381	267.462	390.344	272.413		1.43905	1.15045
ILMN_3236756	ACSF2	103.559	101.955	111.231	114.232	112.08	114.832		1.10412	1.09707
ILMN_1666096	ACSL3	261.666	269.406	256.465	222.646	194.039	212.783		0.766039	0.902158
ILMN_1683598	ACSL4	317.004	339.468	429.61	552.747	571.768	478.371		1.59967	1.49642
ILMN_1685952	ACSM3	108.523	107.69	100.818	99.264	87.0795	97.0585		0.851649	0.925391
ILMN_1662738	ACSM3	118.709	120.677	110.228	104.722	99.325	103.47		0.847144	0.89792
ILMN_1771084	ACSM3	143.508	129.439	120.563	106.073	103.613	107.635		0.773952	0.830328
ILMN_1671703	ACTA2	827.372	689.311	1681.26	1255.33	1801.67	1741.21		2.33594	1.93619
ILMN_1795325	ACTG2	84.3637	85.5512	98.6483	113.339	268.034	323.499		3.48135	1.24761
ILMN_2328280	ACTL6A	756.517	619.146	593.394	527.418	502.579	558.706		0.771472	0.814743
ILMN_1792314	ACTR1A	581.703	565.858	640.484	722.73	697.698	726.94		1.24145	1.18792
ILMN_2319825	ACYP1	243.193	222.973	187.224	190.203	173.382	171.726		0.740311	0.809642
ILMN_1694233	ACYP1	330.006	325.571	259.189	280.422	241.618	241.949		0.737621	0.823109
ILMN_1718946	ADAM10	376.124	370.695	396.033	353.601	325.4	329.001		0.876251	1.00377
ILMN_1713751	ADAM19	514.644	540.55	1174.37	1385.2	1979.64	1298.91		3.10705	2.42569
ILMN_1767362	ADAMTS6	97.615	99.1513	116.715	110.3	126.774	111.985		1.21342	1.15373
ILMN_2311278	ADD3	180.386	215.539	192.179	158.018	153.866	149.408		0.765988	0.884502
ILMN_2096322	ADIPOR1	265.049	281.014	234.035	221.238	330.218	350.146		1.24595	0.833738
ILMN_1688322	ADIPOR1	320.985	346.654	285.319	307.862	389.649	407.63		1.19418	0.888477
ILMN_1708934	ADM	2341.97	2117.51	1356.05	1402.38	1599.19	1467.49		0.687677	0.618553
ILMN_1666019	ADNP	150.886	144.905	145.361	137.013	130.749	122.348		0.855663	0.954641
ILMN_1747227	ADORA1	111.101	113.374	139.644	168.21	142.543	157.039		1.33459	1.37145
ILMN_1790757	ADSL	2173.85	1851.31	1768.79	1555.35	1523.15	1537.99		0.760502	0.825843
ILMN_2092664	ADSS	870.709	864.162	873.699	795.7	775.151	631.327		0.81071	0.962261
ILMN_1778796	ADSS	500.322	444.344	436.721	431.527	374.841	345.353		0.762379	0.919106
ILMN_1803376	AEBP2	273.086	295.052	292.243	235.456	219.703	227.29		0.786768	0.928822
ILMN_1782204	AFP	93.4204	89.0404	96.8251	129.424	98.5577	100.731		1.09223	1.23999
ILMN_1679520	AGPAT1	129.082	137.396	141.592	146.433	150.72	161.594		1.17201	1.08086
ILMN_1814327	AGTR1	91.8525	91.8786	94.2737	98.7678	98.2709	102.337		1.09185	1.05067
ILMN_1770412	AHCYL1	1039.99	922.417	870.659	744.004	789.961	746.085		0.782737	0.822799
ILMN_1673252	AIMP2	2367.82	2236.28	2166.83	1966.97	1937.3	1926.63		0.839236	0.897853
ILMN_1779965	AK1	237.076	244.508	216.801	308.133	319.276	341.695		1.37249	1.09002
ILMN_2396956	AKAP13	267.903	248.911	234.719	240.793	329.561	335.5		1.28685	0.920083
ILMN_2278335	AKR1B15	5195.07	4059.86	2836.41	3644.78	2042.68	3434.71		0.591835	0.700296
ILMN_2412336	AKR1C2	14234.6	9424.19	5749.48	8642.51	5999.88	6075.19		0.510385	0.608316
ILMN_1687757	AKR1C4	9480.26	6117.86	3867.33	5591.56	3692.54	4292.91		0.511949	0.606412
ILMN_1667564	ALDH3A2	290.396	286.204	187.468	205.44	197.794	159.495		0.619648	0.681423
ILMN_1794825	ALDH3A2	1300.68	1214.88	972.16	774.644	880.45	820.237		0.676068	0.6944
ILMN_2401641	ALDH3A2	739.467	771.235	553.213	456.577	489.148	442.565		0.616741	0.668424
ILMN_1771411	ALG6	203.461	201.107	176.807	184.769	170.995	181.28		0.870744	0.893735
ILMN_2365686	ALG8	477.57	495.142	496.775	529.07	411.488	370.108		0.803523	1.05462
ILMN_1797875	ALOX5AP	181.889	176.197	292.317	355.312	349.153	229.888		1.61705	1.80859
ILMN_1736412	AMHR2	240.228	178.946	130.285	136.516	132.473	161.253		0.700724	0.636494
ILMN_1802973	ANAPC4	276.898	285.018	267.507	228.991	255.176	247.889		0.895267	0.883582
ILMN_2199284	ANAPC7	183.805	200.73	191.533	175.19	171.917	151.049		0.839885	0.953677
ILMN_1736340	ANGEL2	563.408	499.916	530.453	538.177	377.065	403.688		0.734256	1.00499
ILMN_2386444	ANGPTL4	125.58	126.664	150.495	141.261	183.073	144.113		1.2971	1.15664
ILMN_1707727	ANGPTL4	390.336	427.827	863.698	820.857	1294.19	708.336		2.44759	2.05895
ILMN_1661833	ANKRD12	145.069	141.92	139.858	133.036	127.029	123.952		0.874532	0.950885
ILMN_1689908	ANKRD13A	178.038	212.951	199.389	273.713	270.566	242.693		1.31272	1.21001
ILMN_1675435	ANKRD16	140.935	138.869	131.965	134.971	118.813	117.815		0.84569	0.95401
ILMN_1659156	ANKRD16	201.682	211.266	194.251	167.134	178.012	148.091		0.789696	0.875136
ILMN_2353431	ANKRD16	112.489	109.375	100.115	111.747	101.115	101.039		0.911165	0.954918
ILMN_2232520	ANKRD28	177.728	202.677	172.573	190.16	147.343	143.904		0.765621	0.953544
ILMN_2075643	ANKRD29	199.038	197.042	167.802	158.928	114.163	153.319		0.675322	0.82491
ILMN_1756727	ANKRD30A	112.297	106.305	97.3048	96.6865	89.1871	92.4047		0.830696	0.887418
ILMN_1813607	ANKRD30A	262.798	258.154	200.706	239.34	160.253	161.83		0.618259	0.844695
ILMN_1796059	ANKRD30A	806.04	786.73	618.354	738.036	425.065	368.042		0.497942	0.851591
ILMN_1805985	ANKRD32	189.567	194.756	174.116	184.49	171.495	151.925		0.841534	0.933085
ILMN_1756417	ANKRD37	108.678	107.249	101.17	109.602	114.589	118.839		1.08105	0.976124
ILMN_2226304	ANKRD50	155.247	163.499	183.184	178.318	213.238	190.129		1.26548	1.13414
ILMN_1724040	ANKRD57	485.139	557.207	588.459	476.224	643.151	748.28		1.3349	1.02143
ILMN_1763837	ANPEP	109.871	137.45	151.916	146.836	167.39	185.167		1.42551	1.20795
ILMN_1799243	ANXA13	110.046	97.1989	83.0188	94.5637	89.4473	91.8956		0.875019	0.856874
ILMN_1711899	ANXA2	6294.35	6036.27	5102.48	4746.11	4048.55	4957.35		0.730369	0.79871
ILMN_2399627	AP1G1	261.731	268.681	320.873	292.475	292.253	320.205		1.15468	1.15636
ILMN_1809957	AP2S1	6665.54	6894.83	7268.58	7822.94	7823.99	8478.25		1.2022	1.11291
ILMN_1659463	APAF1	229.732	225.991	243.786	299.054	329.596	323.921		1.43402	1.19116
ILMN_1661886	APEX1	1747.59	1638.41	1596.24	1626.13	1362.24	1393.13		0.813753	0.951671
ILMN_1658472	APH1A	472.837	433.538	478.131	447.257	509.12	569.832		1.1904	1.02098
ILMN_2398388	APH1A	205.274	193.049	220.152	206.695	223.505	233.767		1.14799	1.07161
ILMN_1793598	APIP	495.557	415.269	414.144	482.895	379.45	362.942		0.815075	0.984863
ILMN_1793360	APITD1	467.282	468.835	437.138	438.507	374.339	337.781		0.760716	0.935402
ILMN_2081465	APLP2	98.5143	103.897	115.592	110.515	113.269	111.206		1.109	1.11706
ILMN_1710482	APLP2	138	202.127	230.224	222.077	296.567	251.408		1.61109	1.3298
ILMN_2219466	APOBEC3B	191.384	187.723	157.466	134.18	134.534	127.704		0.691725	0.769296
ILMN_2296950	APOBEC3F	112.233	118.404	111.466	127.941	136.332	135.902		1.18036	1.03803
ILMN_1761511	APOH	119.709	114.363	97.6675	104.992	94.3147	101.5		0.836557	0.8658
ILMN_1731941	APOM	101.933	97.3544	94.4109	101.413	89.8368	92.5876		0.915384	0.98262
ILMN_2404065	APP	534.208	543.69	792.436	606.535	843.956	945.844		1.66045	1.29787
ILMN_2404063	APP	492.999	451.449	658.799	497.827	782.72	801.861		1.67779	1.22466
ILMN_1767351	AR	128.469	128.503	113.403	119.872	112.757	112.729		0.877476	0.907784
ILMN_1802203	ARF1	1737.95	1814.28	1837.51	1691.16	1965.44	2168.23		1.16368	0.993369
ILMN_1719518	ARF4	1474.73	1552.19	1764.94	1727.92	1984.16	3511.36		1.81555	1.15393
ILMN_1800898	ARG2	92.4248	98.9653	103.821	104.047	103.795	104.811		1.08995	1.0861
ILMN_2215881	ARHGAP11B	146.79	159.922	135.246	143.821	129.343	114.962		0.796532	0.90987
ILMN_1803423	ARHGEF6	94.558	94.662	108.579	104.647	112.171	109.843		1.17331	1.12687
ILMN_1797341	ARID1A	451.1	517.374	509.94	402.584	387.95	400.914		0.814543	0.942228
ILMN_1795247	ARID2	141.482	145.315	144.837	127.501	126.349	131.579		0.899343	0.949583
ILMN_1743241	ARL4A	180.154	175.436	156.561	156.949	156.221	157.681		0.882764	0.881662
ILMN_1797298	ARMC7	166.417	163.097	148.444	131.754	142.749	152.746		0.896762	0.850338
ILMN_2414533	ARMCX6	185.559	204.004	241.64	222.443	232.914	278.86		1.31371	1.19129
ILMN_1716026	ARMCX6	271.5	285.208	385.484	307.263	346.257	408.787		1.35627	1.24436
ILMN_2183510	ARMET	1310.41	1472.45	1628.48	1446.71	1688.68	1786.02		1.24861	1.10505
ILMN_1759915	ARPC1A	1133.17	1209.92	1138.41	1212.95	1842.49	1391.34		1.38016	1.00353
ILMN_1792489	ARPC2	2318.18	2451.93	2583.58	2952.32	3077.69	3595.66		1.39899	1.16054
ILMN_1707336	ARPC4	715.372	646.627	823.236	666.485	837.33	848.519		1.23778	1.09378
ILMN_2395711	ARRB2	113.768	115.839	101.395	100.421	97.3332	105.032		0.881355	0.878962
ILMN_2198515	ARRDC3	109.239	126.557	134.886	123.578	145.846	137.121		1.20005	1.09613
ILMN_1684956	ARSD	106.401	110.481	110.546	106.232	128.639	119.215		1.1428	0.99952
ILMN_1656248	ASAM	111.661	119.886	138.094	131.424	138.589	138.869		1.19828	1.16399
ILMN_2358784	ASB3	257.26	254.928	242.038	252.533	292.501	330.561		1.21647	0.965604
ILMN_1806705	ASB6	109.267	109.257	114.198	115.889	121.068	117.579		1.09209	1.05291
ILMN_1748271	ATF2	115.572	112.735	110.335	107.295	123.685	132.364		1.12151	0.953231
ILMN_2313782	ATG4A	129.713	139.735	146.949	154.628	155.251	177.233		1.23395	1.11924
ILMN_3307158	ATG4A	150.543	152.529	156.895	159.837	180.223	193.412		1.23283	1.04507
ILMN_1700923	ATG4C	174.478	172.729	177.789	177.633	159.916	156.383		0.910984	1.02366
ILMN_1718265	ATG5	150.471	150.06	108.577	148.326	133.399	128.076		0.870042	0.85483
ILMN_1673991	ATIC	2162.04	2273.24	2084.97	2043.17	1897.41	1782.17		0.829618	0.930752
ILMN_1670609	ATOX1	988.12	1036.14	1349.5	1230.87	1278.1	1362.9		1.30468	1.27472
ILMN_1731783	ATP1A1	267.87	271.275	269.226	324.926	386.217	349.906		1.36535	1.10203
ILMN_2415189	ATP1A1	1142.86	1098.82	1056.17	1199.55	1380.21	1346.5		1.21636	1.00626
ILMN_1783304	ATP1B3	2028.57	2285.47	2529.91	3090.96	3077.19	2548.7		1.30409	1.30293
ILMN_1759628	ATP1B3	1845.46	1847.16	2066.34	2680.31	2493.16	2180.08		1.26556	1.28544
ILMN_1687375	ATP2A2	630.594	585.64	361.638	511.848	437.693	470.312		0.746572	0.71819
ILMN_2225887	ATP5EP2	5318.42	5457.58	5546.05	5492.14	5997.23	6401.31		1.15057	1.02433
ILMN_1669102	ATP5G2	123.763	117.019	115.478	117.817	108.405	110.264		0.908163	0.968904
ILMN_1660577	ATP5G2	3223.91	2921.8	3295.73	3010.36	2644.68	2762.42		0.879817	1.0261
ILMN_1794912	ATP5H	4326.12	3747.86	3620.96	4474.62	3431.62	3250.06		0.827556	1.00267
ILMN_1795826	ATP6V0D1	369.502	316.657	343.398	292.314	425.412	406.389		1.21226	0.92648
ILMN_2071937	ATP6V0E1	2599.88	2416.97	2710.27	3420.55	3398.73	3544.63		1.38401	1.22205
ILMN_1797310	ATP6V1D	905.931	966.662	906.358	912.153	1196.74	1635.3		1.51236	0.971119
ILMN_2395055	ATPAF1	184.371	167.956	153.594	176.083	139.109	145.761		0.80854	0.935712
ILMN_2153332	ATXN1	116.572	105.72	133.681	113.721	134.035	124.89		1.1648	1.11296
ILMN_1680955	AURKA	1340.3	1426.73	1284.23	1248.6	1138.72	913.576		0.741696	0.915359
ILMN_2357438	AURKA	1095.54	1263.05	1058.76	1010.92	911.182	754.843		0.706366	0.877511
ILMN_1722292	AVL9	138.705	133.713	139.837	141.625	154.129	152.382		1.12515	1.0332
ILMN_1703123	AXUD1	261.828	354.581	465.36	475.547	730.763	424.036		1.87343	1.52643
ILMN_1739749	B3GALT6	136.35	161.071	150.057	168.645	185.236	183.088		1.2384	1.07155
ILMN_1702817	B3GNTL1	115.33	110.344	100.526	112.852	97.789	95.867		0.858123	0.945516
ILMN_2320349	BACE1	88.2971	94.8501	110.103	102.779	103.54	100.721		1.11528	1.16235
ILMN_2326712	BACE2	141.73	143.604	142.329	139.088	130.487	117.56		0.869321	0.986275
ILMN_1669323	BACE2	179.024	182.008	177.08	154.116	158.983	162.342		0.89002	0.917358
ILMN_1686626	BAT1	1021.76	916.948	931.93	1054.47	781.519	801.952		0.816764	1.0246
ILMN_1703111	BBS7	107.898	107.304	111.736	115.358	115.441	127.727		1.12995	1.05526
ILMN_1794956	BBS9	112.048	109.944	119.052	118.979	120.524	122.625		1.09531	1.07225
ILMN_1763638	BCAR3	505.881	486.526	490.158	672.958	858.094	722.128		1.59231	1.17202
ILMN_2136147	BCAS1	98.3504	88.8415	81.631	86.6511	85.3	84.5045		0.907115	0.898982
ILMN_1811188	BCCIP	672.241	655.696	543.577	682.733	519.085	584.184		0.830815	0.92347
ILMN_1786433	BCCIP	324.971	327.559	291.38	320.953	282.722	260.624		0.832675	0.938397
ILMN_1752899	BCL11A	96.1602	98.549	113.641	102.575	108.66	102.313		1.08353	1.11046
ILMN_1774997	BCL2L11	96.2254	91.9708	93.0914	92.3676	86.0822	87.6768		0.923286	0.985455
ILMN_1751276	BDNF	243.252	298.079	349.988	386.691	342.151	398.139		1.36754	1.36087
ILMN_3178043	BEND7	134.996	119.7	120.534	127.612	110.542	116.673		0.892098	0.974283
ILMN_1804798	BEXL1	101.678	113.56	131.221	111.621	131.227	195.958		1.52011	1.12825
ILMN_1768534	BHLHB2	1221.43	1132.4	1441.93	1642.64	1825.33	1794.06		1.53766	1.31044
ILMN_1763386	BID	363.914	377.581	393.496	404.217	307.114	297.438		0.815316	1.07582
ILMN_2309245	BIN1	328.479	221.316	190.555	179.255	158.161	163.643		0.585315	0.672632
ILMN_1674160	BIN1	289.072	245.658	192.312	177.511	160.703	170.93		0.620186	0.691607
ILMN_2405684	BIRC3	431.324	484.148	364.851	346.222	303.523	369.869		0.735569	0.776728
ILMN_1681644	BIRC3	166.338	149.005	130.106	106.679	108.031	113.039		0.701049	0.750883
ILMN_2349459	BIRC5	1401.35	1382.76	1276.34	1224	847.674	951.518		0.646237	0.898076
ILMN_1803124	BIRC5	193.469	177.026	164.042	185.59	133.301	146.587		0.755442	0.943686
ILMN_2338849	BIRC7	91.1929	92.1885	83.826	95.9995	86.7889	85.7146		0.940682	0.980609
ILMN_2214098	BIVM	164.65	165.072	138.257	174.407	144.97	142.314		0.871291	0.948269
ILMN_1709484	BLM	185.418	185.826	179.891	167.359	164.232	148.058		0.841198	0.935369
ILMN_1679782	BLOC1S2	152.719	137.539	158.678	155.102	169.867	175.745		1.19071	1.08104
ILMN_3307916	BMPER	102.913	115.054	126.211	136.277	133.836	128.953		1.20564	1.20426
ILMN_1656373	BNC2	131.44	138.57	165.208	156.17	171.84	164.915		1.24719	1.19024
ILMN_1730032	BOK	133.712	128.741	135.752	136.373	153.844	151.082		1.16183	1.03685
ILMN_1656382	BOLA2	168.709	174.983	184.978	187.237	143.196	143.182		0.833243	1.08299
ILMN_2147920	BP75	192.639	177.631	167.686	169.664	165.751	159.208		0.877627	0.911092
ILMN_2352921	BPGM	154.751	143.936	132.577	137.551	169.002	203.468		1.24702	0.904387
ILMN_2311089	BRCA1	248.102	260.087	226.573	211.828	189.665	189.279		0.745676	0.862673
ILMN_1738027	BRCA1	278.05	294.592	253.827	263.335	221.682	212.574		0.758338	0.903115
ILMN_2082810	BRD7	523.364	506.87	495.742	517.977	421.456	444.019		0.840075	0.98397
ILMN_1797693	BRI3BP	429.33	376.044	316.244	387.26	346.56	294.429		0.79589	0.873513
ILMN_2155172	BRIX1	811.788	737.103	578.565	638.405	560.608	468.436		0.664374	0.785703
ILMN_1679800	BRIX1	1865.2	1616.73	1257.67	1553.62	1334.6	1039.08		0.681712	0.807394
ILMN_1666967	BRP44L	116.907	128.027	133.132	116.609	151.295	167.93		1.30331	1.01963
ILMN_2226324	BRP44L	271.574	370.186	387.852	337.75	455.937	592.507		1.6337	1.13064
ILMN_2086222	BRWD2	214.736	229.654	242.719	251.783	261.222	253.85		1.15905	1.11277
ILMN_1734483	BSDC1	248.647	231.298	224.838	252.777	287.038	343.348		1.31345	0.995144
ILMN_1691927	BTBD1	256.176	273.929	241.604	221.701	223.704	207.811		0.814019	0.873987
ILMN_1707481	BTBD15	127.745	125.418	115.793	127.218	116.38	115.568		0.916202	0.959902
ILMN_2319414	BTF3	8529.55	8351.32	7623.53	7923.03	7236.47	7142.21		0.851773	0.920957
ILMN_1770085	BTG2	135.957	121.259	147.246	137.363	185.842	175.347		1.40422	1.1065
ILMN_1707339	BTG3	331.786	306.386	337.616	402.214	387.016	474.352		1.34974	1.15929
ILMN_2364852	BTN2A1	259.099	274.753	248.508	298.801	348.606	342.173		1.29395	1.02521
ILMN_1689237	BVES	125.413	129.21	161.073	155.667	177.198	189.233		1.43911	1.24396
ILMN_2071682	C10ORF141	95.0458	94.7204	114.717	101.461	102.596	109.638		1.1184	1.13918
ILMN_1753490	C10ORF39	124.922	126.743	115.07	131.707	117.384	116.133		0.927887	0.980578
ILMN_1765480	C10ORF4	94.6886	99.8631	97.5608	95.6826	91.0197	90.9191		0.935169	0.993275
ILMN_1777591	C10ORF65	130.924	134.535	138.471	125.605	110.309	115.434		0.850383	0.994788
ILMN_3192411	C10ORF75	146.049	129.609	120.501	127.249	103.902	104.328		0.755393	0.898757
ILMN_1739345	C11ORF48	713.453	662.539	630.859	592.169	565.688	584.195		0.835675	0.888833
ILMN_1802649	C11ORF58	144.639	132.492	128.817	135.032	122.603	117.925		0.867923	0.952071
ILMN_3249949	C11ORF58	210.559	226.358	216.789	159.239	175.346	177.2		0.806895	0.860639
ILMN_3250798	C11ORF58	106.665	101.773	103.056	98.6205	93.2957	97.3126		0.91446	0.967563
ILMN_1677080	C11ORF60	143.624	137.501	137.699	143.581	150.989	151.881		1.07735	1.00055
ILMN_1709050	C11ORF63	103.699	99.4752	102.079	102.454	98.2445	94.8413		0.950344	1.00669
ILMN_1767103	C11ORF63	99.7397	100.167	92.9911	96.6856	94.6931	95.0219		0.949018	0.948826
ILMN_1779163	C11ORF67	445.986	378.93	481.823	429.399	554.488	570.967		1.36433	1.10462
ILMN_2105923	C12ORF32	334.681	322.984	333.767	322.001	269.456	241.804		0.777387	0.997116
ILMN_1727055	C12ORF48	784.853	813.661	780.015	778.918	604.805	603.11		0.755648	0.975239
ILMN_1791792	C12ORF5	403.342	343.265	429.587	423.219	437.112	519.85		1.28175	1.14224
ILMN_1667510	C12ORF65	267.254	262.18	257.749	217.154	227.589	184.739		0.778809	0.897001
ILMN_1658494	C13ORF15	170.505	133.591	108.448	120.107	107.761	118.535		0.744159	0.75159
ILMN_1682774	C13ORF27	321.663	317.393	287.757	286.819	267.371	233.912		0.784409	0.899099
ILMN_1761486	C13ORF34	233.704	225.358	227.086	207.759	208.399	210.251		0.911969	0.947245
ILMN_3243945	C13ORF37	415.44	375.706	339.529	360.84	332.976	310.712		0.813615	0.885259
ILMN_1769757	C14ORF104	317.474	301.989	311.718	289.365	239.204	279.741		0.837734	0.970329
ILMN_1807667	C14ORF105	140.515	142.38	132.822	119.073	120.905	111.553		0.821712	0.890416
ILMN_2083789	C14ORF105	125.873	126.954	124.82	114.21	104.301	112.945		0.85927	0.945427
ILMN_1666208	C14ORF106	481.786	523.62	460.181	458.504	406.31	387.668		0.789709	0.913746
ILMN_2053281	C14ORF149	642.237	707.888	522.747	695.08	471.639	494.458		0.71556	0.90201
ILMN_1667374	C14ORF149	317.672	341.331	250.087	338.69	228.217	248.654		0.723626	0.893436
ILMN_1807031	C14ORF28	114.993	115.207	120.436	122.17	125.091	140.528		1.15386	1.05389
ILMN_1653553	C14ORF80	428.928	493.253	404	379.04	376.385	309.595		0.743868	0.849118
ILMN_1657744	C15ORF17	189.479	228.83	243.488	260.127	275.837	347.222		1.48947	1.20393
ILMN_1652008	C15ORF23	265.074	229.155	209.681	201.177	189.443	181.581		0.750714	0.831312
ILMN_2141807	C15ORF23	309.277	277.239	250.101	257.077	228.195	204.048		0.736965	0.864731
ILMN_1811264	C15ORF57	264.395	217.127	250.08	309.782	311.864	306.586		1.28436	1.16269
ILMN_1656452	C16ORF59	233.873	255.241	211.57	246.544	204.299	178.961		0.78358	0.936621
ILMN_2135991	C16ORF69	100.885	104.467	102.628	105.158	109.676	108.351		1.06172	1.01185
ILMN_1686835	C17ORF41	176.69	179.334	156.741	171.366	149.963	121.942		0.763724	0.921585
ILMN_2398926	C17ORF58	480.453	422.409	353.136	411.41	303.012	345.098		0.717838	0.846802
ILMN_1700515	C17ORF58	392.567	373.469	303.282	361.408	248.01	286.456		0.697703	0.867701
ILMN_1712985	C17ORF58	427.494	406.274	342.823	390.214	265.427	319.018		0.700967	0.879185
ILMN_1797155	C17ORF75	144.416	145.476	133.817	134.672	106.833	107.302		0.738672	0.926171
ILMN_2207328	C18ORF10	240.049	230.997	225.953	220.103	211.17	215.197		0.905149	0.946947
ILMN_2169089	C18ORF54	147.765	159.561	160.324	134.663	135.622	130.399		0.865597	0.959848
ILMN_1798728	C19ORF2	3086.23	2983.5	2880.44	2938.86	2613.96	2377.25		0.822312	0.958743
ILMN_2383484	C19ORF48	475.958	475.266	471.063	425.191	397.665	353.304		0.789476	0.942211
ILMN_2077886	C1ORF109	267.301	276.366	243.725	262.859	243.319	239.357		0.887814	0.931792
ILMN_1805474	C1ORF131	440.081	444.298	418.787	408.587	401.048	355.651		0.855627	0.935541
ILMN_1787280	C1ORF135	174.513	174.769	135.351	154.42	145.268	132.993		0.796667	0.829622
ILMN_3236244	C1ORF174	459.249	474.107	467.992	438.185	382.59	380.432		0.817504	0.97088
ILMN_2196232	C1ORF210	100.601	100.461	108.837	102.559	119.762	108.76		1.13657	1.0514
ILMN_1661595	C1ORF53	266.146	275.637	300.815	350.157	234.57	203.705		0.808949	1.20154
ILMN_1689585	C20ORF194	105.672	105.321	118.432	114.379	115.109	115.501		1.09298	1.10341
ILMN_1771815	C20ORF43	1385.95	1349.4	1364.89	1359.26	1499.04	1494.27		1.09431	0.995906
ILMN_2176251	C20ORF72	667.892	756.268	718.996	624.822	623.55	580.464		0.845421	0.943586
ILMN_1712386	C21ORF45	295.161	306.615	277.356	272.809	255.142	189.765		0.739323	0.914236
ILMN_2356311	C21ORF51	304.665	248.116	239.75	251.329	208.46	230.003		0.793195	0.888381
ILMN_2266005	C21ORF51	192.072	171.009	161.299	169.07	149.533	150.946		0.827582	0.909905
ILMN_1795836	C21ORF57	335.812	285.986	319.554	364.483	223.195	275.955		0.802754	1.1001
ILMN_2331197	C21ORF66	130.968	127.099	126.641	126.007	117.758	115.258		0.90293	0.979003
ILMN_1787370	C2ORF56	162.092	167.099	143.844	172.896	129.588	149.272		0.847104	0.962173
ILMN_2224486	C3ORF14	543.999	463.752	430.749	345.139	368.423	374.453		0.737163	0.769921
ILMN_1665217	C3ORF34	116.335	110.586	107.499	101.518	105.354	100.241		0.906021	0.921097
ILMN_1815682	C3ORF37	408.334	378.44	344.647	314.531	320.01	327.005		0.822364	0.837823
ILMN_2184612	C3ORF52	184.439	153.821	204.389	217.618	219.815	205.053		1.25604	1.24758
ILMN_1661409	C3ORF63	139.662	138.558	135.407	127.62	130.006	127.116		0.92417	0.945393
ILMN_1724990	C3ORF75	150.977	144.781	132.378	113.798	133.945	122.084		0.865668	0.832355
ILMN_1672124	C4ORF18	86.9722	91.5946	98.4451	93.7838	101.809	102.775		1.1457	1.07651
ILMN_1761941	C4ORF18	93.4022	91.7944	116.163	100.814	104.519	105.754		1.1354	1.17161
ILMN_3249240	C4ORF46	174.379	176.985	190.08	177.682	150.758	154.932		0.870008	1.04667
ILMN_3239531	C4ORF48	145.488	150.81	173.03	182.095	176.871	168.253		1.16479	1.19854
ILMN_1746819	C5	353.307	443.568	209.714	184.13	185.105	256.343		0.553974	0.494236
ILMN_1677292	C5ORF30	213.215	201.09	193.429	176.403	163.735	147.262		0.750649	0.892657
ILMN_2161357	C6ORF111	215.535	230.416	226.67	218.449	203.02	204.53		0.913893	0.998136
ILMN_1720858	C6ORF115	500.536	484.582	564.093	692.68	569.635	646.62		1.23463	1.27576
ILMN_1651987	C6ORF129	293.386	248.302	245.745	267.883	232.21	221.782		0.838106	0.948198
ILMN_1804834	C6ORF130	306.538	279.183	272.717	248.655	232.227	246.173		0.816773	0.890139
ILMN_1813236	C6ORF136	211.529	210.591	172.842	207.128	185.212	178.614		0.861902	0.900145
ILMN_1761762	C6ORF141	188.985	214.9	136.703	153.032	133.312	140.956		0.679075	0.717369
ILMN_1706645	C6ORF150	117.751	114.298	104.985	114.916	103.764	102.98		0.890953	0.947651
ILMN_1766219	C6ORF54	122.292	119.982	109.56	112.25	99.6698	101.839		0.831738	0.915532
ILMN_1754920	C6ORF58	89.6543	89.0328	98.9991	100.343	106.197	116.271		1.24501	1.11559
ILMN_1705116	C6ORF85	151.247	154.461	161.15	132.94	181.308	162.45		1.12447	0.961996
ILMN_1741475	C7ORF47	321.202	314.765	256.541	285.513	240.871	268.498		0.800937	0.85233
ILMN_1740903	C7ORF49	319.552	288.745	275.358	256.865	234.95	235.12		0.772765	0.874939
ILMN_1659990	C7ORF68	368.449	408.786	326.631	281.365	269.176	319.937		0.757959	0.782254
ILMN_1784408	C8ORF48	117.255	119.835	128.278	130.271	138.002	130.578		1.13282	1.09052
ILMN_1717403	C9ORF100	137.683	133.589	117.889	116.081	110.502	109.308		0.810294	0.86249
ILMN_1674629	C9ORF3	273.987	276.336	208.652	233.441	202.902	209.8		0.749926	0.803334
ILMN_1685104	C9ORF6	160.563	191.728	190.512	210.578	201.163	223.687		1.20596	1.13852
ILMN_3244065	C9ORF69	283.012	393.581	375.178	410.276	467.196	469.854		1.38495	1.1609
ILMN_1803652	C9ORF91	186.341	183.584	181.258	178.149	158.857	166.771		0.880257	0.971566
ILMN_1674650	C9ORF95	113.685	114.737	122.842	116.203	132.903	124.555		1.12712	1.0465
ILMN_1653001	CABLES1	173.065	156.004	126.427	117.135	116.178	120.196		0.718309	0.740154
ILMN_1762407	CABLES2	105.33	104.159	103.75	117.526	112.53	119.437		1.1073	1.05627
ILMN_1683415	CAMK2D	152.312	146.418	133.639	132.981	133.415	137.517		0.906943	0.892511
ILMN_2319544	CAMK2D	122.162	120.393	110.809	101.479	104.309	108.829		0.878727	0.875219
ILMN_1714599	CAMLG	1375.86	1401.5	1723.75	1519.52	1618.01	1740.33		1.20918	1.16775
ILMN_1744647	CAND1	374.449	340.029	377.258	408.135	321.185	318.824		0.895772	1.09926
ILMN_1664012	CANT1	275.154	319.589	309.288	324.84	409.603	347.597		1.27315	1.06622
ILMN_1797604	CAP1	3182.93	2915.43	3138.86	3164.68	4014.42	4121.25		1.33408	1.03364
ILMN_2101034	CAPN12	149.149	116.687	106.995	109.483	98.4012	108.767		0.779311	0.814329
ILMN_1716057	CAPN2	243.498	320.664	328.819	397.993	400.78	380.3		1.38449	1.2883
ILMN_2393254	CAPNS1	787.51	763.742	910.845	889.003	944.745	1023.05		1.26852	1.16026
ILMN_1782897	CAPRIN1	339.607	334.573	297.438	306.035	275.946	297.574		0.850693	0.895123
ILMN_2388155	CASP3	352.803	366.846	364.405	316.512	445.855	412.008		1.19206	0.946178
ILMN_2322806	CAST	451.556	421.891	424.884	354.984	342.404	277.661		0.709906	0.892862
ILMN_1658835	CAV2	979.547	813.551	713.814	1059.17	556.394	532.06		0.607024	0.988785
ILMN_2360730	CAV2	334.4	286.679	285.238	332.285	236.63	224.965		0.743215	0.994274
ILMN_1685580	CBLB	138.514	146.859	164.455	152.608	177.606	192.265		1.2961	1.11105
ILMN_1813400	CBR4	150.246	138.588	135.798	140.459	120.678	127.783		0.860221	0.956456
ILMN_3252733	CBY3	97.1141	97.8621	92.6214	93.7626	93.3551	88.7454		0.933963	0.955932
ILMN_1701477	CCDC101	102.755	103.464	99.0669	100.437	96.2654	97.2163		0.938234	0.967439
ILMN_1716368	CCDC111	124.35	122.453	111.138	114.23	111.019	103.332		0.868513	0.913151
ILMN_1739054	CCDC121	113.62	116.398	110.467	103.413	106.332	107.236		0.928485	0.929841
ILMN_1767260	CCDC138	151.647	166.294	143.809	136.244	126.205	134.409		0.819692	0.880831
ILMN_1677239	CCDC14	466.65	473.223	415.778	412.493	345.739	375.89		0.767794	0.881259
ILMN_1804953	CCDC18	142.915	141.765	127.67	138.087	120.199	114.936		0.825962	0.933527
ILMN_1812489	CCDC21	189.055	192.566	164.373	143.171	168.205	137.3		0.800544	0.805888
ILMN_2288784	CCDC34	633.807	538.737	560.931	509.536	415.434	403.023		0.698018	0.912944
ILMN_1657547	CCDC34	1773.73	1626.23	1706.73	1683.45	1459.2	1228.02		0.79037	0.997128
ILMN_2369756	CCDC46	148.836	137.825	157.6	181.229	127.074	124.246		0.876715	1.18198
ILMN_1745946	CCDC5	316.808	321.779	300.807	277.278	265.471	235.648		0.78473	0.905255
ILMN_1686920	CCDC58	673.207	516.36	508.601	525.414	457.071	428.911		0.744794	0.869237
ILMN_1811050	CCDC88A	130.091	144.002	131.479	129.901	120.894	113.81		0.856291	0.95362
ILMN_3248263	CCDC93	221.487	227.322	263.828	222.191	267.181	248.262		1.14847	1.08291
ILMN_1712803	CCNB1	824.411	697.446	660.749	715.122	483.031	473.252		0.628366	0.904075
ILMN_2347349	CCNB1IP1	316.423	393.844	427.204	478.911	466.506	500.528		1.36151	1.27574
ILMN_1752394	CCNB1IP1	182.183	211.864	221.406	258.752	244.005	263.422		1.28773	1.21853
ILMN_1801939	CCNB2	1584.42	1400.33	1398.8	1425.83	1213.48	845.689		0.689897	0.946353
ILMN_1810069	CCNYL1	175.679	173.348	143.968	129.36	139.477	150.259		0.830123	0.783112
ILMN_1689378	CCRN4L	217.479	226.624	231.409	222.891	258.024	273.407		1.19664	1.02296
ILMN_1662954	CCT7	1373.76	1532.27	1230.72	1446.11	1228.88	1087.81		0.7972	0.921129
ILMN_1717868	CCT8	2526.01	2538.52	2279.16	2258.72	2136.15	2302.57		0.876433	0.896012
ILMN_2326713	CD151	5543.08	5359.49	5962.27	6470.18	7000.36	6357.03		1.22516	1.14032
ILMN_1716797	CD302	109.555	112.304	105.388	102.732	99.6306	94.6334		0.87562	0.938076
ILMN_2348788	CD44	593.125	615.258	751.604	592.738	724.317	878.51		1.32642	1.11251
ILMN_1785268	CD58	194.5	217.725	215.724	226.028	237.501	232.644		1.14051	1.07163
ILMN_2333687	CD59	99.2149	105.191	122.108	111.928	113.157	121.154		1.1463	1.14496
ILMN_1724789	CD59	238.883	316.39	404.12	301.771	377.831	393.655		1.38938	1.27125
ILMN_1753468	CD63	961.766	933.245	975.116	1036.89	1115.76	1343		1.29749	1.06174
ILMN_1689953	CD81	6836.98	8117.97	8917.28	8464.91	10237.9	8807.2		1.2735	1.1623
ILMN_2392274	CD82	125.966	145.528	177.921	190.503	157.181	164.343		1.18427	1.35702
ILMN_1662973	CD82	100.805	114.6	121.939	117.94	121.885	122.461		1.13435	1.11362
ILMN_2328666	CD83	98.3833	104.153	119.337	108.215	120.62	128.088		1.22797	1.12351
ILMN_2056032	CD99	367.362	362.712	367.612	435.297	591.444	454.989		1.43332	1.09976
ILMN_2256765	CDC16	542.175	683.23	642.275	601.626	818.552	906.675		1.40788	1.01509
ILMN_1747911	CDC2	1394.76	1304.09	1064.93	1072.03	1050.64	789.336		0.681762	0.791802
ILMN_1710428	CDC2	414.202	418.708	356.414	331.986	315.448	266.23		0.698369	0.8265
ILMN_2338323	CDC25B	1101.62	952.949	757.917	717.118	795.519	720.474		0.737866	0.717931
ILMN_2407619	CDC25C	160.927	176.033	153.894	138.913	149.71	125.866		0.81783	0.868968
ILMN_1713006	CDC34	262.242	252.85	249.06	271.245	303.908	282.904		1.13924	1.01012
ILMN_1652777	CDC42EP2	157.417	161.402	189.049	159.679	209.616	186.313		1.24186	1.09381
ILMN_1670238	CDC45L	804.828	783.923	688.599	620.806	620.476	459.931		0.680035	0.824172
ILMN_1785914	CDC6	117.443	113.577	110.016	112.452	103.91	104.144		0.900587	0.962983
ILMN_1741801	CDC7	194.288	193.614	164.243	153.049	152.994	140.976		0.757846	0.81797
ILMN_2341611	CDCP1	117.596	130.57	123.466	151.097	149.888	166.36		1.27434	1.10637
ILMN_1752914	CDGAP	86.7759	84.83	90.1437	93.3611	103.306	93.4545		1.14658	1.06934
ILMN_1779228	CDH2	2005.28	2158.58	3906.8	3625.74	4074.11	2820.43		1.65581	1.80903
ILMN_1690653	CDK2AP2	170.813	160.601	195.117	163.449	224.393	233.26		1.38091	1.08193
ILMN_2415529	CDK5RAP2	217.095	190.873	175.208	216.261	162.834	151.802		0.771228	0.959561
ILMN_1655990	CDK5RAP2	677.776	636.502	586.798	590.098	533.239	442.034		0.74206	0.89547
ILMN_1784602	CDKN1A	2420.13	1733.4	2787.37	2335.4	3723.12	4574.58		1.99775	1.23335
ILMN_1666305	CDKN3	875.546	708.976	662.251	603.161	563.88	428.864		0.626526	0.798608
ILMN_2335398	CECR5	127.138	131.887	120.635	118.624	121.523	115.739		0.915982	0.923692
ILMN_2392472	CENPA	307.034	290.859	271.338	264.645	249.467	212.248		0.772236	0.896452
ILMN_1693221	CENPH	157.098	155.362	150.048	158.178	133.541	135.068		0.859659	0.98645
ILMN_1661776	CENPJ	169.502	189.148	157.371	175.941	153.095	146.926		0.83653	0.929352
ILMN_1737195	CENPK	483.906	432.212	375.78	426.57	328.765	296.996		0.683057	0.875815
ILMN_2368718	CENPM	469.149	482.97	404.656	482.283	366.731	292.193		0.69206	0.931542
ILMN_2368721	CENPM	190.131	178.651	162.091	187.177	154.021	134.519		0.782412	0.947082
ILMN_1720526	CENPN	825.046	731.803	673.366	681.439	549.72	521.555		0.688105	0.870222
ILMN_2199676	CEP152	124.718	125.169	118.957	120.318	113.403	110.039		0.89417	0.957533
ILMN_1686458	CEP152	132.442	136.402	128.411	127.785	118.164	106.219		0.834625	0.952958
ILMN_1747016	CEP55	1319.38	1077.68	959.05	861.298	866.126	685.311		0.647225	0.759409
ILMN_1787808	CEP63	289.045	302.331	274.232	269.398	268.14	229.573		0.841619	0.919263
ILMN_1741350	CEP70	125.644	127.767	115.544	111.371	109.734	113.982		0.882819	0.895443
ILMN_3265365	CEP78	333.4	387.306	354.9	308.311	270.576	276.856		0.759577	0.920225
ILMN_3185161	CEP78	204.728	209.765	202.657	182.396	181.225	163.865		0.832558	0.928973
ILMN_1750563	CERCAM	112.105	114.857	126.947	129.61	128.629	131.95		1.14812	1.1304
ILMN_2359945	CES1	221.651	143.583	283.727	362.35	292.351	298.222		1.61697	1.76894
ILMN_2150095	CES4	100.509	97.7396	113.671	117.373	116.976	113.621		1.16317	1.16542
ILMN_2224031	CETN3	467.634	429.027	337.132	340.933	353.308	397.227		0.837034	0.756211
ILMN_2044645	CGB1	250.278	221.31	374.109	700.591	459.16	344.86		1.70492	2.27889
ILMN_2083578	CGB7	88.2413	87.8078	94.3614	105.76	101.453	94.7802		1.11465	1.13674
ILMN_1735579	CGB8	103.126	102.296	123.029	163.07	141.698	119.578		1.2719	1.39274
ILMN_1746801	CGN	160.438	149.498	132.927	125.591	119.795	139.964		0.838105	0.834104
ILMN_2148150	CHAC2	192.605	180.11	176.223	186.791	162.133	156.947		0.856095	0.973974
ILMN_1669842	CHAF1A	150.656	163.752	142.081	139.397	139.933	126.628		0.847817	0.895262
ILMN_1674231	CHAF1B	328.169	345.765	282.396	282.588	293.474	237.174		0.787389	0.838338
ILMN_1673026	CHCHD3	544.849	485.914	475.669	459.084	444.293	403.885		0.822864	0.906856
ILMN_2339284	CHD2	123.867	125.196	116.832	115.37	106.634	115.341		0.891239	0.932299
ILMN_1762972	CHD9	363.238	373.603	434.798	345.143	439.973	447.353		1.20423	1.05849
ILMN_1664630	CHEK1	319.321	323.635	289.673	287.685	266.579	283.11		0.854939	0.897974
ILMN_2395240	CHEK2	144.897	143.652	130.143	129.236	106.26	127.124		0.808817	0.898904
ILMN_2106902	CHES1	170.045	178.119	276.35	174.135	237.413	204.839		1.27024	1.29389
ILMN_1679428	CHIC2	435.47	455.032	451.409	423.727	612.39	609.881		1.37256	0.982745
ILMN_1770044	CHRNA5	332.996	341.652	369.667	308.085	299.61	265.005		0.836903	1.0046
ILMN_2069286	CHRNA9	88.3688	87.9691	100.56	116.462	113.847	135.301		1.4129	1.23072
ILMN_1732831	CHST7	349.525	469.701	609.337	549.459	798.161	698.867		1.82737	1.4145
ILMN_2048793	CIAO1	571.126	594.715	587.122	632.504	505.664	483.069		0.848085	1.04613
ILMN_1680967	CIP29	1420.41	1389.57	1508.44	1475.63	1612.04	1848.07		1.23136	1.06195
ILMN_1671516	CIR1	164.962	150.299	161.011	148.735	181.132	176.832		1.13545	0.98251
ILMN_2122952	CISD1	1588.39	1626.77	1354.91	1646.62	1406.26	1343.11		0.855126	0.933556
ILMN_1674411	CKAP2	308.23	291.636	316.443	276.38	260.208	237.009		0.82888	0.988259
ILMN_2181060	CKAP2	401.783	351.433	394.021	339.208	324.712	277.059		0.798936	0.973464
ILMN_1790891	CKAP4	749.314	943.053	783.591	701.625	1114.83	1476.12		1.53096	0.877597
ILMN_2072296	CKS2	5501.4	4515.87	4415.7	4150.03	3690.64	3709.43		0.738732	0.855097
ILMN_1654875	CLC	97.141	95.5502	98.972	93.5334	90.2429	88.9619		0.930011	0.999036
ILMN_1694731	CLCN7	983.906	1092.43	1053.25	930.758	1234.21	1535.46		1.33392	0.955533
ILMN_2077680	CLDND2	208.745	192.27	184.803	160.863	140.004	168.739		0.769903	0.861977
ILMN_1723058	CLIP1	105.305	104.525	99.6255	105.211	93.6236	93.3598		0.891117	0.976199
ILMN_1701094	CLN8	128.172	135.217	133.931	148.389	143.588	157.474		1.14303	1.07187
ILMN_1659976	CLP1	225.954	244.741	243.694	227.254	196.857	213.556		0.871933	1.00054
ILMN_1663538	CLYBL	121.659	115.662	136.778	126.735	102.873	100.625		0.857481	1.11037
ILMN_1705442	CMTM3	949.719	1207.69	1411.98	1209.57	1475.28	1648.76		1.44806	1.21514
ILMN_2370208	CMTM3	260.477	319.328	387.185	324.917	455.033	527.637		1.69483	1.22817
ILMN_1710124	CMTM8	570.645	607.725	516.547	545.373	433.524	478.588		0.774045	0.901177
ILMN_1748844	CNKSR3	291.005	262.45	199.638	218.596	166.765	203.271		0.668593	0.755679
ILMN_1770290	CNN2	932.888	1039.18	1127.7	1644.76	1868.23	1376.31		1.64525	1.40586
ILMN_1662328	CNNM3	245.76	269.272	220.813	214.482	215.655	193.133		0.793714	0.84518
ILMN_1715886	CNOT7	602.451	567.367	606.184	526.347	501.593	410.473		0.779665	0.968126
ILMN_3187324	CNRIP1	98.1303	98.7923	109.113	101.334	105.26	106.39		1.07479	1.06868
ILMN_1651282	COL17A1	125.521	138.925	180.371	135.987	181.679	192.551		1.41514	1.1963
ILMN_1653028	COL4A1	1189.35	955.21	1927.61	2777.11	3337.04	2142.89		2.55527	2.19379
ILMN_1724994	COL4A2	167.445	161.441	234.064	270.293	300.482	212.888		1.56093	1.53353
ILMN_2292123	COL4A3BP	140.998	139.538	117.146	138.147	120.697	112.12		0.829903	0.91002
ILMN_1732151	COL6A1	164.262	168.409	153.921	168.833	136.2	133.689		0.811278	0.97019
ILMN_1777378	COMMD6	2060.13	1782.4	2125.34	2013.28	2205.39	2686.16		1.273	1.07706
ILMN_2339627	COPE	251.986	256.419	272.181	277.901	293.849	292.418		1.15315	1.08198
ILMN_1667361	COPZ2	97.7463	95.2855	103.746	115.648	107.202	119.744		1.17569	1.13657
ILMN_1756572	COQ2	579.01	631.637	613.729	660.394	454.25	463.487		0.758055	1.05243
ILMN_1801378	COQ3	419.889	357.361	347.717	322.554	297.775	286.981		0.75234	0.862362
ILMN_2084836	CORO2B	89.206	96.5915	105.154	106.987	114.737	104.974		1.18253	1.14178
ILMN_1676880	CORO2B	90.6051	90.2498	97.4274	99.976	98.0722	98.9882		1.08961	1.0915
ILMN_1813386	CORO6	93.7504	90.8217	92.651	98.2812	96.808	98.1366		1.0562	1.03446
ILMN_1731374	CPE	103.314	100.645	111.841	117.041	123.11	117.317		1.1788	1.1222
ILMN_1814770	CPNE4	163.564	165.03	211.842	163.805	202.293	211.35		1.25883	1.14319
ILMN_2087528	CPSF3	1193.75	1229.25	1234.01	1000.96	1050.9	886.722		0.799679	0.922399
ILMN_1795454	CPSF6	126.873	120.976	117.381	111.334	100.229	107.01		0.836147	0.922797
ILMN_1668582	CRBN	187.047	203.116	205.947	184.731	216.909	266.612		1.23928	1.00132
ILMN_2225735	CRBN	222.582	279.725	280.192	247.73	293.641	369.339		1.31987	1.05099
ILMN_1703072	CREB3	119.58	118.329	127.099	127.502	131.707	149.871		1.18355	1.07016
ILMN_1739558	CRELD1	123.28	121.323	116.665	122.353	142.889	155.007		1.21787	0.977171
ILMN_1748707	CRELD2	334.507	350.853	403.668	415.58	496.13	540.015		1.51183	1.19535
ILMN_1694432	CRIP2	199.652	168.3	318.904	248.159	275.193	245.284		1.41453	1.54114
ILMN_1813256	CRIPT	424.85	393.929	369.939	379.705	479.715	550.891		1.25871	0.915563
ILMN_1789541	CRMP1	98.3404	108.485	137.003	125.806	120.138	120.103		1.16157	1.27068
ILMN_2229170	CRSP9	147.906	145.691	145.475	130.686	125.85	127.425		0.862664	0.940615
ILMN_1739770	CRSP9	239.306	211.647	209.842	179.334	178.891	169.135		0.771756	0.863009
ILMN_1719290	CRYZL1	110.283	110.638	101.875	103.617	99.742	100.225		0.90515	0.930159
ILMN_1683538	CSDE1	122.409	126.944	118.425	124.576	108.273	114.188		0.892152	0.974527
ILMN_1665797	CSE1L	1621.75	1372.69	1360.83	1311.95	1085.63	984.8		0.691425	0.892586
ILMN_1706238	CSE1L	1885.1	1686.53	1531.53	1360.09	1246.21	1130.54		0.665453	0.809609
ILMN_2055523	CSGALNACT1	195.246	174.617	132.673	153.359	135.057	137.866		0.737903	0.773348
ILMN_2364174	CSNK1A1	197.613	203.706	220.339	192.61	250.34	221.413		1.17551	1.02898
ILMN_1704713	CSNK1G1	390.155	316.814	393.91	329.087	460.18	548.007		1.42607	1.02267
ILMN_2386355	CSNK2A1	456.398	458.661	473.223	418.362	524.365	551.827		1.17609	0.974348
ILMN_1811921	CSRP1	729.154	909.826	1028.68	1409.96	1772.15	1461.88		1.9732	1.4879
ILMN_1777168	CSRP2BP	103.874	104.2	109.756	97.3891	99.3892	97.6301		0.946874	0.995539
ILMN_2397880	CSTF3	379.238	381.892	339.219	376.986	252.476	271.599		0.688547	0.940975
ILMN_1762002	CSTF3	281.353	249.79	247.676	289.914	195.232	200.269		0.744623	1.01214
ILMN_2407589	CTDP1	135.596	134.931	141.088	127.297	147.375	150.203		1.1	0.992085
ILMN_2392189	CTDSPL	272.745	301.111	246.438	262.457	218.06	236.52		0.792149	0.8868
ILMN_2115125	CTGF	456.264	607.141	637.599	761.812	1485.59	1143.15		2.472	1.31597
ILMN_1699829	CTGF	1244.77	1447.82	1636.54	2071.56	3993.07	3088.64		2.63008	1.37715
ILMN_1748352	CTSL2	267.775	251.059	201.543	185.95	216.944	167.554		0.741081	0.746854
ILMN_2331163	CUL4A	646.063	635.77	665.074	549.57	564.517	511.821		0.839686	0.947584
ILMN_1765044	CUTC	400.629	379.083	313.723	336.83	207.883	313.745		0.669	0.83435
ILMN_1729237	CYB5R1	235.597	241.014	261.151	215.248	331.253	297.654		1.31954	0.999554
ILMN_2308582	CYB5R3	2164.05	1976.37	2007.18	1884.82	2731.69	3031.87		1.39202	0.940001
ILMN_1788131	CYP26A1	190.171	142.248	143.061	125.399	125.086	126.379		0.756471	0.807596
ILMN_1812297	CYP26B1	194.26	197.117	228.147	212.649	282.889	249.455		1.36018	1.12627
ILMN_3251260	CYP4F3	98.4953	96.6326	88.0755	91.6753	90.4806	91.2388		0.931283	0.921195
ILMN_1736190	CYP4F3	131.119	110.844	95.9443	97.8347	93.4384	101.485		0.805588	0.800861
ILMN_2188264	CYR61	525.437	449.134	497.52	805.753	845.863	633.409		1.51787	1.33728
ILMN_1787251	DAAM1	181.275	171.072	184.34	190.368	242.474	213.748		1.29481	1.06346
ILMN_2046470	DAAM1	197.23	210.223	195.704	216.93	264.289	234.56		1.22431	1.01272
ILMN_2328094	DACT1	97.3143	93.3487	115.625	111.124	111.798	103.237		1.12783	1.18927
ILMN_1683682	DAGLA	118.125	121.621	116.075	118.58	108.308	112.586		0.921368	0.978764
ILMN_2112493	DAP	191.898	195.214	214.11	253.432	268.242	226.133		1.27709	1.20777
ILMN_1769926	DBN1	546.414	607.114	721.07	737.033	911.225	790.621		1.47534	1.26404
ILMN_2374352	DBNDD1	1291	1392.46	1531.42	1758.51	1667.47	1756.94		1.27612	1.226
ILMN_1730612	DBNDD2	471.756	469.05	335.055	196.388	298.644	339.735		0.678545	0.56488
ILMN_1715555	DBP	110.698	111.615	107.811	103.416	96.8709	97.1425		0.872701	0.950128
ILMN_1811648	DCAKD	560.191	497.443	469.246	485.538	393.786	393.617		0.744495	0.902754
ILMN_1712419	DCDC2	253.784	187.554	149.071	167.749	151.915	142.082		0.666147	0.717861
ILMN_1651433	DCK	298.125	288.192	268.611	239.384	248.274	259.821		0.866587	0.866418
ILMN_2407434	DCLK2	107.444	102.427	109.693	105.264	121.739	115.55		1.13064	1.02423
ILMN_1719449	DCLK2	103.098	98.8208	102.266	103.684	112.854	109.312		1.10028	1.01996
ILMN_1734096	DCLRE1A	201.258	204.672	193.971	168.89	176.639	168.411		0.850022	0.893898
ILMN_1762281	DCTN3	496.213	575.707	639.483	702.751	785.022	651.826		1.34044	1.25218
ILMN_1666192	DCTN5	439.545	499.613	549.215	483.849	638.366	662.782		1.38544	1.09999
ILMN_3242459	DCTPP1	3166.79	3021.48	3141.42	2678.03	2615.43	2668.76		0.853906	0.940401
ILMN_1665455	DCUN1D3	252.882	218.367	196.374	251.404	369.328	349.93		1.52628	0.950194
ILMN_1801403	DCUN1D4	266.033	267.517	289.162	262.378	234.512	196.652		0.808103	1.03372
ILMN_1694530	DDA1	1117.02	1010.59	757.458	861.213	853.5	841.614		0.796722	0.760793
ILMN_1668507	DDAH1	217.63	170.301	176.43	341.443	332.106	273.104		1.5601	1.33496
ILMN_1696537	DDIT4L	103.861	97.4096	100.21	105.274	116.468	130.499		1.22704	1.02094
ILMN_1812262	DDR1	164.717	140.704	158.055	174.039	189.897	191.869		1.24997	1.08733
ILMN_1760147	DDX12	139.775	139.783	110.067	116.074	112.206	106.964		0.783989	0.808925
ILMN_1700628	DDX24	504.803	446.407	500.276	488.943	548.389	548.92		1.15359	1.03996
ILMN_1747303	DDX39	1771.54	2060.01	1780.72	1823.7	1488.88	1290.34		0.72535	0.94072
ILMN_1812976	DDX54	213.362	234.583	227.617	226.711	196.501	187.173		0.856521	1.01425
ILMN_1699711	DEDD	119.369	123.067	133.249	124.915	143.544	136.173		1.15377	1.06487
ILMN_1802819	DEPDC1	254.217	220.025	239.852	226.064	197.043	184.604		0.80475	0.982442
ILMN_2103685	DEPDC1B	441.392	362.022	348.482	353.747	329.692	249.156		0.720484	0.874057
ILMN_1814600	DEPDC1B	241.749	215.144	186.875	180.509	191.4	143.761		0.733566	0.804094
ILMN_1756685	DEPDC6	117.922	104.261	99.7769	93.5028	93.8325	90.6275		0.830218	0.869913
ILMN_1761969	DERL2	416.821	461.96	511.176	434.177	529.525	645.071		1.33662	1.07575
ILMN_1738866	DEXI	787.849	823.964	938.115	1059.98	1020.58	977.335		1.23954	1.23966
ILMN_1791396	DGCR6	589.247	667.678	714.838	681.597	758.591	843.468		1.27459	1.11099
ILMN_2186108	DGCR6	102.157	100.33	104.751	100.824	113.273	113.439		1.11963	1.01525
ILMN_1663685	DGCR6	621.095	636.856	706.763	651.037	768.081	831.458		1.27154	1.07937
ILMN_1765326	DGKD	189.34	198.54	222.682	231.928	251.007	217.097		1.20683	1.17204
ILMN_1741960	DGKG	117.481	112.538	105.834	108.836	107.596	101.48		0.908948	0.933271
ILMN_1782813	DHFR	191.028	178.271	160.937	183.342	151.528	134.437		0.774345	0.932251
ILMN_1756701	DHRS11	205.906	195.188	167.377	191.178	142.375	177.075		0.796446	0.893946
ILMN_1725726	DHRS2	92.762	101.03	125.958	103.654	107.994	113.044		1.1406	1.18484
ILMN_2384857	DHRS2	93.0287	102.868	188.246	125.256	125.795	136.548		1.33919	1.60035
ILMN_1807455	DHRS7	856.553	942.549	1211.22	1104.77	1131.11	1442.85		1.43069	1.2873
ILMN_1803312	DIMT1L	1573.46	1729.46	1621.4	1753.06	1333.32	1304.47		0.798625	1.02166
ILMN_3245591	DIO3OS	165.218	137.204	116.817	127.561	108.168	114.393		0.735928	0.808072
ILMN_1695745	DISP1	107.298	106.782	114.648	105.277	120.647	115.087		1.10115	1.0273
ILMN_1736704	DIXDC1	105.823	99.4808	122.92	115.213	138.783	119.641		1.25874	1.15991
ILMN_1802518	DKFZP667M2411	136.243	132.769	126.618	134.276	123.383	115.846		0.889287	0.969821
ILMN_1815673	DKK3	296.143	306.54	446.35	790.748	709.312	421.084		1.87561	2.05265
ILMN_2398159	DKK3	343.268	366.244	573.011	933.595	988.986	540.491		2.15567	2.12344
ILMN_1681641	DLEU1	162.612	157.175	147.151	159.906	132.514	144.414		0.865977	0.960195
ILMN_2043918	DLEU1	315.946	315.317	289.14	307.047	244.758	276.943		0.826439	0.944434
ILMN_1749829	DLGAP5	728.679	636.676	605.645	558.779	555.378	444.268		0.732151	0.852836
ILMN_1699491	DMRTA2	89.1175	89.8037	89.5644	87.47	96.8244	96.3771		1.07981	0.989454
ILMN_1664682	DNA2	161.266	163.771	147.916	136.727	139.092	129.811		0.827298	0.875726
ILMN_1753243	DNAJB11	995.09	1164.76	1199.65	949.029	1549.12	1394.36		1.36282	0.994828
ILMN_1758545	DNAJB12	141.627	142.54	132.157	131.993	128.305	121.448		0.878895	0.929559
ILMN_1668979	DNAJB14	137.045	134.976	122.814	117.882	113.317	125.675		0.87858	0.884843
ILMN_2390974	DNAJB2	274.526	281.924	310.317	387.295	420.573	335.766		1.35922	1.25368
ILMN_2222317	DNAJB4	183.262	192.776	207.17	218.95	246.187	241.924		1.29804	1.13318
ILMN_1813019	DNAJB4	145.172	153.856	163.105	175.251	177.008	191.436		1.23214	1.13152
ILMN_1711089	DNAJC21	115.788	110.684	109.397	109.195	105.204	102.308		0.916279	0.965202
ILMN_1659843	DNAJC3	107.848	105.79	103.118	110.776	111.305	113.769		1.05353	1.0012
ILMN_3307827	DNAJC4	130.724	126.667	149.886	152.296	147.452	148.794		1.15096	1.17402
ILMN_2375418	DPH2	539.428	520.734	381.726	539.961	432.059	445.219		0.827494	0.869383
ILMN_1792356	DPYSL4	373.059	407.153	656.534	622.605	797.202	683.689		1.89806	1.63948
ILMN_1771622	DRD1IP	84.6501	89.8298	92.6452	101.595	99.1162	93.7896		1.1056	1.11325
ILMN_1776577	DSCC1	263.57	274.386	222.812	253.001	201.63	197.267		0.741506	0.884483
ILMN_1706498	DSE	307.155	299.161	416.969	431.456	551.03	439.229		1.63324	1.39931
ILMN_1715905	DSN1	239.826	256.08	236.45	216.572	189.589	177.316		0.739869	0.913525
ILMN_2380698	DSTN	3369.59	3028.62	3529.53	4894.42	4091.29	4246.65		1.30317	1.31661
ILMN_1706426	DSTN	3955.42	3571.46	4000.64	4923.17	4542.36	4810.17		1.24255	1.18559
ILMN_1779711	DTL	315.572	325.766	298.328	315.36	248.707	200.828		0.700932	0.956887
ILMN_1744129	DTX2	121.725	117.188	105.857	110.992	110.422	106.058		0.906101	0.907651
ILMN_1740171	DUSP11	501.773	516.575	577.68	593.452	623.625	756.231		1.35499	1.15003
ILMN_1666546	DUSP14	571.082	577.442	805.002	732.426	771.484	678.3		1.2623	1.33861
ILMN_1764361	DUSP16	114.236	107.989	123.16	112.959	125.371	135.926		1.17582	1.06252
ILMN_2283398	DUSP4	87.8324	87.8338	87.1967	89.378	98.2818	95.0428		1.10052	1.00517
ILMN_1732688	DUT	479.199	584.995	568.389	556.114	375.696	311.321		0.645574	1.05667
ILMN_2374778	DUT	268.508	359.774	310.965	319.616	224.018	186.089		0.652744	1.00366
ILMN_1681890	DYNLT3	236.99	271.181	311.34	451.347	324.889	321.853		1.27268	1.50085
ILMN_2400326	DYRK3	126.949	130.807	159.02	141.225	160.237	150.406		1.20519	1.16484
ILMN_2400322	DYRK3	112.039	116.463	123.943	119.731	127.2	129.78		1.12463	1.0664
ILMN_1777233	E2F2	236.473	246.558	192.942	184.096	177.393	168.161		0.715388	0.780566
ILMN_1811006	E2F8	96.3071	94.9392	93.3613	92.0465	90.9673	87.9884		0.935734	0.969471
ILMN_1768127	EBNA1BP2	3154.95	3064.75	2662.92	2364.68	2536.9	2013.18		0.73156	0.808336
ILMN_1757827	ECOP	164.348	160.713	213.862	183.75	229.825	196.338		1.31103	1.22319
ILMN_1717173	ECT2	1447.91	1561.6	1206.26	1069.33	1054.35	1122.06		0.72318	0.756132
ILMN_1779828	EDEM1	248.074	237.876	228.298	203.116	307.237	343.614		1.33934	0.887774
ILMN_2065299	EDEM3	167.444	177.239	193.657	179.261	221.52	202.978		1.23156	1.08192
ILMN_1685678	EEF1B2	632.324	622.315	566.775	549.185	480.89	517.578		0.795821	0.889468
ILMN_1725105	EEF1E1	1014.35	944.279	854.414	955.689	693.741	834.232		0.780124	0.924168
ILMN_1735877	EFEMP1	143.26	172.657	200.981	263.896	220.593	199.881		1.33096	1.47152
ILMN_1673880	EFEMP1	97.8573	108.623	106.23	118.794	120.432	117.486		1.15226	1.08981
ILMN_2350634	EFEMP1	213.947	292.218	343.298	451.3	531.872	386.506		1.81438	1.56984
ILMN_1761463	EFHD2	2266.11	2268.96	1176.48	1678.18	1388.95	1877.25		0.720211	0.629463
ILMN_2371053	EFNA1	108.126	100.418	114.104	124.136	129.355	128.959		1.23865	1.14239
ILMN_2371055	EFNA1	338.93	244.7	364.586	432.876	448.757	459.929		1.55696	1.36638
ILMN_1729167	EFTUD1	172.794	186.278	193.615	164.457	192.568	210.241		1.1218	0.997216
ILMN_1803348	EHBP1	948.481	839.634	871.359	838.711	758.714	752.622		0.845212	0.956354
ILMN_1776000	EID3	158.058	178.436	138.848	151.054	124.458	142.139		0.792277	0.861534
ILMN_1755419	EIF1AX	216.846	214.615	230.433	182.169	188.654	180.65		0.855939	0.956293
ILMN_1753716	EIF2B1	316.989	330.904	343.492	336.068	392.808	383.942		1.19888	1.04888
ILMN_1798014	EIF2S2	158.107	183.1	178.924	151.102	135.454	149.585		0.835383	0.967229
ILMN_1655497	EIF4B	1996.52	1975.82	2035.53	1873.25	1774.82	1727.31		0.881629	0.983999
ILMN_1728083	EIF4EBP2	147.745	177.84	153.505	197.755	194.242	219.83		1.27178	1.07885
ILMN_1769201	ELF3	473.076	282.736	170.74	145.648	152.811	215.926		0.487868	0.418605
ILMN_1655930	ELL2	134.817	138.007	150.447	175.964	223.625	173.051		1.45397	1.19642
ILMN_1765159	ELMOD2	154.654	155.314	152.01	164.866	180.8	203.969		1.24132	1.02229
ILMN_1797074	EMG1	701.771	595.479	506.808	499.446	465.123	538.797		0.773884	0.775682
ILMN_1716552	ENAH	115.463	110.515	107.38	108.511	98.6863	99.3668		0.876428	0.955363
ILMN_2365383	ENO3	118.813	123.134	145.17	164.56	179.454	149.089		1.35792	1.28016
ILMN_1803676	ENOSF1	394.517	368.063	301.514	330.421	302.495	252.287		0.727507	0.828679
ILMN_1704753	EPAS1	456.241	420.524	385.769	635.899	648.574	770.625		1.61868	1.16527
ILMN_1672022	EPHA4	93.5973	94.9176	95.5764	100.106	104.99	103.554		1.10624	1.03802
ILMN_1692261	EPHB1	102.51	116.331	249.114	158.453	176.551	132.629		1.41281	1.86238
ILMN_1652369	ERCC1	105.317	103.201	106.224	105.225	113.52	123.284		1.13565	1.01406
ILMN_1815859	ERCC2	112.773	114.799	116.703	135.831	132.621	127.921		1.14488	1.10969
ILMN_2334205	ERCC6L	205.048	201.546	187.204	183.317	165.035	144.493		0.761269	0.911281
ILMN_2334204	ERCC6L	197.485	170.787	163.221	155.882	149.651	136.887		0.77806	0.866487
ILMN_1747281	EVI5L	127.465	137.475	164.233	152.34	186.335	175.704		1.3665	1.19489
ILMN_1651628	EXOC6	236.957	237.847	201.297	193.025	191.639	181.726		0.786356	0.830494
ILMN_1679687	EXOC6	103.722	104.531	101.362	92.2358	94.7983	96.8953		0.92048	0.929625
ILMN_1815012	EXOC7	408.156	463.336	484.861	507.649	615.493	508.075		1.28925	1.13886
ILMN_1657662	EXOD1	94.1559	95.8798	95.1289	93.0119	87.7855	86.2419		0.915762	0.990029
ILMN_1670796	EXOSC10	919.085	832.101	788.44	822.874	717.577	728.151		0.825571	0.920127
ILMN_1697736	EXOSC2	467.017	536.385	465.975	461.345	394.054	415.107		0.806417	0.924176
ILMN_1708936	EXOSC3	2015.23	1927.29	1626.02	1715.78	1511.76	1751.55		0.827722	0.847633
ILMN_1734194	EXOSC3	1015.33	874.521	789.454	749.952	659.248	794.469		0.769225	0.814566
ILMN_1756162	EXOSC8	555.39	481.205	382.477	465.99	354.386	404.85		0.732433	0.818514
ILMN_1721713	EXOSC9	359.073	375.027	313.63	315.222	310.405	311.603		0.847307	0.85663
ILMN_1797950	EXTL2	142.241	175.441	189.256	178.088	210.1	201.571		1.29586	1.15633
ILMN_1778226	EXTL3	139.766	128.944	138.661	134.849	175.671	150.094		1.21233	1.01786
ILMN_1652913	EZH2	249.297	252.912	223.514	241.041	202.752	166.75		0.735753	0.925023
ILMN_1742866	F2R	265.121	341.267	377.33	253.694	446.348	395.701		1.38863	1.04063
ILMN_1673113	F2RL1	371.495	541.499	490.234	816.864	716.852	769.409		1.6279	1.43166
ILMN_1790249	F8A1	248.454	230.915	259.205	272.111	316.944	279.226		1.24366	1.10836
ILMN_2374362	FAM108B1	162.575	163.037	158.608	146.349	145.573	140.92		0.879862	0.936567
ILMN_1762622	FAM111B	110.461	104.273	98.6747	104.997	98.2752	99.1198		0.919256	0.948487
ILMN_3244607	FAM117B	160.477	150.355	153.269	140.829	146.236	137.581		0.913088	0.946164
ILMN_2189605	FAM122B	278.892	279.493	256.226	258.98	229.534	210.972		0.788894	0.92267
ILMN_1686254	FAM127B	349.423	318.062	387.398	376.456	372.087	427.206		1.19747	1.14438
ILMN_3238845	FAM165B	415.305	357.959	346.744	330.819	289.177	280.942		0.73729	0.876238
ILMN_1712577	FAM174A	180.795	176.694	168.616	179.824	195.611	236.941		1.20997	0.974686
ILMN_2287276	FAM177A1	205.073	217.8	196.373	217.443	296.656	239.072		1.26688	0.978582
ILMN_1808584	FAM36A	279.211	249.875	276.354	291.613	204.714	220.455		0.80359	1.07349
ILMN_1808356	FAM3A	556.58	585.572	635.33	696.91	689.075	686.442		1.20432	1.16643
ILMN_2368773	FAM3C	189.907	169.744	175.673	176.431	216.26	271.43		1.35601	0.979013
ILMN_1706015	FAM43A	213.801	196.173	211.344	200.185	270.681	266.917		1.3113	1.00379
ILMN_1713266	FAM46C	94.6263	93.2602	90.8763	97.375	99.5285	101.288		1.06882	1.00194
ILMN_1697998	FAM54A	181.011	180.376	164.975	144.047	155.634	152.229		0.851892	0.855099
ILMN_3238797	FAM72A	162.331	152.077	135.997	133.381	128.417	137.968		0.847258	0.856776
ILMN_1719870	FAM72D	441.331	368.856	324.677	303.463	265.257	263.75		0.652945	0.775303
ILMN_1699623	FAM81A	204.746	199.156	162.211	176.997	167.199	139.11		0.758376	0.839827
ILMN_1772973	FAM82B	104.282	111.541	99.6555	102.81	92.0212	98.504		0.882784	0.93811
ILMN_3250592	FAM86A	192.54	223.405	204.081	193.931	171.572	181.961		0.84995	0.956885
ILMN_1804117	FAM89B	201.231	209.739	249.963	264.114	396.74	274.227		1.63264	1.25089
ILMN_1726756	FANCB	156.301	155.98	150.77	148.351	143.989	127.991		0.870946	0.957858
ILMN_1698252	FANCB	147.853	157.077	139.266	149.747	141.095	123.9		0.869038	0.9478
ILMN_1683112	FANCC	124.641	124.825	115.592	120.782	108.494	111.432		0.881584	0.947515
ILMN_1655642	FANCI	548.433	542.075	490.1	501.208	437.358	345.49		0.717874	0.909033
ILMN_1754045	FANCL	362.461	305.241	294.115	335.541	251.637	240.651		0.737287	0.943018
ILMN_2143250	FAR1	269.916	245.989	259.771	268.04	216.183	201.153		0.808942	1.02308
ILMN_1719205	FBL	3549.32	3976.31	3309.9	3333.29	3180.6	2748.86		0.787902	0.882742
ILMN_1693438	FBXL12	146.622	147.339	166.516	169.235	160.335	173.38		1.13524	1.14217
ILMN_3307782	FBXL18	677.781	806.242	814.4	746.158	1187.41	879.328		1.39266	1.05157
ILMN_2285112	FBXO11	819.835	827.333	904.068	934.574	1067.85	913.116		1.20265	1.11625
ILMN_1703955	FBXO32	213.255	200.672	586.52	345.878	304.624	419.559		1.74954	2.25257
ILMN_1656691	FBXO4	188.565	191.931	209.571	179.801	161.303	165.279		0.858307	1.02333
ILMN_1754279	FBXW7	140.092	138.25	163.685	151.265	157.747	151.341		1.11046	1.13152
ILMN_3243529	FDXACB1	107.235	102.832	114.794	102.502	115.467	113.526		1.09009	1.03441
ILMN_2364305	FECH	101.702	102.502	104.51	98.317	92.47	97.9299		0.932399	0.993257
ILMN_1755834	FEN1	400.083	384.598	312.202	279.074	319.913	277.141		0.760888	0.753524
ILMN_1695290	FERMT2	847.647	972.242	1239.42	1340.58	1752.88	1280.14		1.6666	1.41767
ILMN_1762531	FGF9	106.338	100.594	91.5333	104.003	91.8248	91.1631		0.884288	0.944927
ILMN_2355831	FHL2	1680.37	1455.17	2381.87	2423.44	2573.56	2538.5		1.63036	1.53253
ILMN_1668411	FHL2	725.344	703.149	1059.93	1080.6	1392.31	1084.82		1.73409	1.49846
ILMN_1651776	FHOD1	185.251	245.308	230.784	238.285	332.938	283.824		1.43247	1.08944
ILMN_1761322	FHOD3	132.769	127.238	159.535	173.846	165.961	146.398		1.20134	1.2822
ILMN_1778152	FIGNL1	195.566	219.336	177.123	167.464	161.008	175.694		0.811523	0.830526
ILMN_1659905	FKBP10	104.724	110.781	125.457	110.885	116.884	117.96		1.08974	1.09669
ILMN_2089977	FKBP9L	557.599	574.121	643.201	582.749	779.463	704.015		1.31082	1.08326
ILMN_2120072	FLJ13305	197.103	217.016	221.667	201.453	177.617	154.37		0.801671	1.02174
ILMN_1697491	FLJ14213	119.814	133.427	126.748	133.326	147.886	161.118		1.2202	1.02698
ILMN_1706558	FLJ20628	225.352	226.777	203.891	218.501	190.547	195.279		0.853355	0.934229
ILMN_1711928	FLJ20920	96.0685	98.6776	104.59	105.459	106.395	108.387		1.10288	1.07858
ILMN_1730351	FLJ35767	109.855	109.336	110.472	114.784	103.541	100.545		0.931087	1.02767
ILMN_1715748	FLNC	104.874	107.113	187.971	298.58	159.864	144.242		1.43455	2.29519
ILMN_2362581	FNDC3A	146.724	210.84	281.292	316.16	295.196	375.721		1.87636	1.6709
ILMN_1705111	FNDC3A	169.56	201.571	273.303	326.481	315.381	336.912		1.75758	1.6161
ILMN_1751607	FOSB	99.2203	100.98	107.833	118.152	139.08	127.904		1.33358	1.1288
ILMN_1704418	FOXD1	352.411	394.741	615.715	606.925	800.601	488.485		1.72533	1.6364
ILMN_1812893	FOXK1	97.315	92.7693	87.8493	90.0347	87.7591	86.1253		0.914775	0.935817
ILMN_1681456	FOXL2	112.35	110.402	116.076	124.283	128.149	129.966		1.15876	1.07905
ILMN_1712095	FOXO4	103.48	106.932	108.511	102.382	116.301	125.943		1.15128	1.00229
ILMN_1772957	FOXRED2	124.313	119.53	113.775	119.735	107.465	113.31		0.905396	0.957626
ILMN_1681724	FPGS	97.3915	98.3541	100.59	101.625	110.259	108.63		1.11823	1.03305
ILMN_1755405	FRAG1	605.667	600.968	588.425	556.151	471.587	478.143		0.787089	0.948569
ILMN_3241870	FRMD8	535.822	546.272	536.897	486.719	743.671	704.216		1.33804	0.945959
ILMN_1665024	FRYL	96.1278	96.6899	99.3281	92.3068	99.7346	101.906		1.04576	0.993866
ILMN_1808707	FSCN1	4218.55	4815.11	5633.99	5847.41	9690.09	6259.65		1.76559	1.27096
ILMN_1712896	FST	106.819	117.025	101.976	118.597	144.165	145.012		1.29187	0.985389
ILMN_1700081	FST	168.977	224.687	163.687	231.56	375.252	395.937		1.959	1.00402
ILMN_1776552	FUBP1	136.76	138.803	134.943	146.386	126.021	126.435		0.916142	1.02092
ILMN_1790228	FURIN	107.419	106.655	115.21	118.366	144.346	124.026		1.25364	1.0911
ILMN_2154052	FVT1	281.664	303.71	335.925	300.638	333.283	413.681		1.27605	1.08745
ILMN_1774826	FXN	92.6193	91.4052	92.1747	93.7236	89.0644	85.0318		0.946049	1.01018
ILMN_1679640	FXR1	881.249	716.148	756.327	741.623	661.887	559.388		0.76454	0.937744
ILMN_2309848	FXYD5	1798.58	2579.74	3189.63	3557.24	3576.26	3435.58		1.60149	1.54097
ILMN_2381753	G3BP2	747.653	519.028	917.274	824.876	938.242	851.227		1.41272	1.37537
ILMN_1720422	G3BP2	268.118	215.068	342.968	288.747	319.786	321.288		1.32676	1.30739
ILMN_2347949	G6PD	5669.68	6058.12	4427.12	5063.99	5031.92	4123.38		0.78065	0.809283
ILMN_2151281	GABARAPL1	158.181	146.734	189.696	183.737	208.064	244.36		1.48377	1.22471
ILMN_1660718	GABBR2	88.0981	89.7637	97.6464	96.6476	100.989	94.801		1.1008	1.09239
ILMN_1729905	GAL3ST1	121.048	114.827	101.982	107.204	93.0567	103.441		0.833058	0.886852
ILMN_1653687	GALNT9	105.301	109.618	131.544	130.01	124.742	163.53		1.3413	1.21699
ILMN_1733847	GALR2	105.979	112.044	105.905	136.917	146.822	127.903		1.26008	1.11374
ILMN_1679476	GART	846.824	758.739	768.627	551.427	629.615	637.262		0.789054	0.822175
ILMN_1729180	GATM	96.0743	100.353	97.183	103.789	113.524	113.957		1.1581	1.02314
ILMN_1699631	GATS	135.286	127.95	112.101	112.661	106.586	110.749		0.825627	0.853839
ILMN_2364110	GBA	193.049	192.987	218.331	209.087	233.245	239.57		1.2248	1.1072
ILMN_2148785	GBP1	91.7526	90.4701	95.8768	92.2943	147.011	118.686		1.45809	1.03264
ILMN_1774077	GBP2	96.6677	96.1394	92.7896	95.1461	134.896	123.126		1.33824	0.974735
ILMN_2215194	GCLC	117.308	108.199	98.3931	101.929	92.8187	98.2952		0.847485	0.88832
ILMN_1730575	GCLC	714.539	545.939	394.74	360.688	360.955	345.85		0.560743	0.599319
ILMN_1788547	GCLM	1535.64	1231.25	1024.27	1066.88	909.373	1060.41		0.711911	0.755777
ILMN_2225974	GCLM	231.533	220.145	178.84	194.76	175.624	201.661		0.835298	0.827137
ILMN_1695135	GCM1	94.8458	97.6499	98.9187	99.5085	102.977	101.016		1.05973	1.03081
ILMN_2090782	GCSH	778.642	765.449	706.915	671.717	570.023	543.514		0.721161	0.892844
ILMN_1734153	GDI1	170.811	165.302	161.519	219.347	197.389	216.091		1.23018	1.13315
ILMN_1663383	GEMIN5	191.327	186.088	183.991	173.465	175.875	169.402		0.914848	0.947116
ILMN_1809590	GINS2	1218.05	1122.73	1074	1091.66	866.931	797.101		0.710887	0.925184
ILMN_1807501	GINS4	244.52	230.351	214.191	220.829	196.721	180.082		0.793484	0.916081
ILMN_1733155	GIT1	128.976	127.314	125.185	125.308	139.02	137.745		1.07989	0.977379
ILMN_1736972	GKAP1	141.907	130.287	122.853	121.663	111.84	108.428		0.809232	0.898313
ILMN_1769245	GLIPR1	256.457	292.119	390.291	678.834	1184.1	1253.36		4.44324	1.94891
ILMN_1652631	GLIPR2	262.836	284.721	679.473	815.203	686.805	399.472		1.98386	2.72972
ILMN_1664099	GLIS3	140.672	121.875	112.891	117.88	108.48	105.355		0.814466	0.878967
ILMN_2402600	GLIS3	368.609	315.355	263.152	326.476	250.519	236.771		0.712449	0.862073
ILMN_2188722	GLS	343.231	359.528	435.437	352.74	640.367	643.189		1.82645	1.12155
ILMN_1764380	GLTP	1161.33	1150.23	1492.16	1500.89	1524.89	1984.86		1.51835	1.29482
ILMN_1670532	GMCL1	291.489	335.616	299.47	267.366	246.561	237.301		0.77158	0.903893
ILMN_2194627	GMCL1	276.75	298.424	282.441	252.227	221.079	217.185		0.761966	0.929577
ILMN_1720114	GMNN	583.884	486.477	444.646	529.115	409.491	368.366		0.726725	0.909751
ILMN_3242205	GMPS	796.385	761.536	667.556	634.332	606.349	630.347		0.793811	0.835657
ILMN_1769191	GNAS	4585.87	5243.9	6160.87	5951.87	6713.55	5895.33		1.28272	1.23225
ILMN_1658928	GNB2	131.758	138.054	138.952	157.854	162.02	154.879		1.17452	1.10005
ILMN_1708414	GNL3L	779.922	848.769	805.824	766.746	631.545	576.796		0.74191	0.965542
ILMN_1764230	GNPTG	158.353	152.921	173.859	147.526	169.684	182.844		1.13253	1.03248
ILMN_1747935	GOLGB1	226.789	226.297	230.442	202.701	258.087	260.241		1.14399	0.955982
ILMN_1722812	GOSR2	93.0699	91.7671	92.4978	91.6204	100.856	96.7533		1.0691	0.996111
ILMN_2121816	GPR137B	169.2	171.507	167.078	201.728	210.956	211.234		1.23916	1.08247
ILMN_1656422	GPR87	92.7955	93.1137	105.327	103.597	124.004	113.934		1.27986	1.12379
ILMN_1709307	GPSM1	324.3	442.227	489.74	490.931	515.932	534.354		1.37019	1.27937
ILMN_1749662	GPX1	691.699	762.275	916.484	1087.74	1355.71	1211.55		1.76568	1.37844
ILMN_1734353	GPX4	1226.44	1056.23	1228.68	1160.44	769.734	714.553		0.650241	1.04664
ILMN_2378952	GPX4	2365.57	1855.8	1978.02	2088.18	1214.41	1254.97		0.58497	0.963242
ILMN_1737157	GRAMD1A	828.008	1070.14	904.169	806.86	1351.69	1601.25		1.5557	0.901423
ILMN_2340919	GRB10	180.6	170.536	213.724	177.94	224.302	234.67		1.30711	1.11542
ILMN_2413816	GRB14	313.909	389.268	331.588	295.549	246.704	287.223		0.759306	0.891863
ILMN_2124585	GREM1	221.074	151.318	216.417	285.886	289.815	262.359		1.48278	1.34886
ILMN_1752965	GREM1	506.287	300.627	466.042	657.745	820.622	745.085		1.94037	1.3927
ILMN_1699854	GRIN3B	96.7301	108.321	124.128	143.96	127.119	119.644		1.20343	1.30742
ILMN_1724250	GRN	260.637	258.424	335.401	270.483	388.246	344.561		1.41179	1.16727
ILMN_1775182	GSR	602.876	612.901	483.895	505.344	424.036	470.173		0.735504	0.813668
ILMN_1771964	GSTA4	150.498	136.58	146.148	152.977	109.413	124.47		0.814703	1.04196
ILMN_1737857	GTF2B	216.093	231.032	231.627	197.469	272.893	266.562		1.2065	0.95968
ILMN_1758398	GUK1	530.517	552.338	640.307	585.407	760.202	867.794		1.50343	1.13193
ILMN_2148527	H19	112.144	95.8537	93.3861	90.7701	86.9755	87.6944		0.839768	0.885376
ILMN_2253065	H2AFJ	107.839	108.778	105.95	108.175	97.9742	99.0813		0.909697	0.988495
ILMN_1706784	H2AFV	131.466	137.01	131.113	111.662	121.614	117.163		0.889377	0.904272
ILMN_1674034	H2AFY	302.162	284.975	314.327	372.225	424.1	427.368		1.4502	1.16932
ILMN_1723414	HACL1	836.044	814.039	803.77	741.36	617.115	601.639		0.738602	0.936396
ILMN_1719906	HADH	746.359	873.238	892.243	474.652	593.686	574.551		0.721313	0.843972
ILMN_1793201	HAGHL	138.665	131.72	132.93	134.388	112.639	123.013		0.871542	0.98866
ILMN_1654319	HAPLN3	126.336	130.409	120.532	116.439	111.63	110.791		0.866313	0.922983
ILMN_1693905	HAT1	318.062	279.345	250.285	309.346	249.456	244.745		0.827244	0.936766
ILMN_1664139	HAUS6	133.656	122.524	125.513	123.409	107.526	113.864		0.864196	0.97167
ILMN_2365528	HAUS8	129.888	133.48	127.405	128.711	123.546	118.337		0.918422	0.972461
ILMN_1768020	HAUS8	129.49	132.664	125.238	120.59	123.338	117.887		0.920163	0.937722
ILMN_2121408	HBEGF	144.973	138.234	135.719	192.477	196.881	182.019		1.33789	1.15886
ILMN_2160764	HBP1	156.907	165.56	198.745	158.36	184.755	217.119		1.24625	1.10742
ILMN_1753745	HDDC2	2259.31	2191.97	2094.91	2434.98	1825.46	1731.38		0.799059	1.01766
ILMN_1678252	HDLBP	114.786	108.394	100.52	107.791	94.2055	94.9313		0.847465	0.933378
ILMN_1801891	HDX	100.863	95.6517	92.4324	93.9152	91.4007	87.5856		0.910806	0.948265
ILMN_1770667	HECA	110.92	104.302	111.535	102.991	124.316	119.702		1.1338	0.996768
ILMN_1656902	HECTD3	153.12	169.337	154.464	178.938	183.182	191.756		1.16275	1.03394
ILMN_1783610	HELLS	191.762	199.271	187.9	180.146	150.563	160.837		0.796354	0.941215
ILMN_2202423	HELLS	326.621	372.696	309.71	372.469	290.812	236.913		0.75463	0.975493
ILMN_2374159	HERPUD1	317.655	323.736	346.412	323.591	435.434	791.444		1.91284	1.04461
ILMN_1762712	HHEX	268.095	310.256	245.459	237.764	216.63	226.024		0.765373	0.835519
ILMN_1807710	HINT1	5806.15	5636.02	5110.78	5595.45	4995.09	5356.07		0.90465	0.935681
ILMN_1701403	HIP1	137.917	142.589	138.113	124.628	120.522	128.699		0.888467	0.936666
ILMN_1792689	HIST1H2AC	167.75	207.836	192.45	317.037	244.292	252.86		1.32367	1.35651
ILMN_1651496	HIST1H2BD	452.358	386.423	652.694	962.908	1010.6	576.297		1.89191	1.92613
ILMN_1658702	HIST1H2BJ	120.778	123.059	127.104	169.653	198.089	149.957		1.42737	1.21703
ILMN_2075334	HIST1H4C	9848.48	10094.9	9050.21	7015.44	8018.34	6667.99		0.736399	0.805561
ILMN_1681542	HIST1H4E	97.1151	99.1541	97.7682	102.088	105.258	105.013		1.07134	1.01828
ILMN_1751120	HIST1H4H	112.646	113.354	124.277	166.915	163.998	169.429		1.47535	1.28846
ILMN_1732071	HIST2H2BE	122.026	128.727	127.492	148.516	154.04	141.336		1.17795	1.10072
ILMN_1703906	HJURP	619.362	575.86	496.935	405.663	435.458	366.452		0.670931	0.755173
ILMN_1721113	HLA-C	104.18	111.45	105.157	103.881	114.528	121.665		1.09536	0.969427
ILMN_1761733	HLA-DMB	128.179	111.357	106.698	106.152	98.7048	107.91		0.862562	0.888593
ILMN_1765258	HLA-E	316.409	367.506	380.043	385.588	443	453.716		1.31115	1.11948
ILMN_2186806	HLA-F	118.515	123.628	117.744	129.541	144.622	130.844		1.13762	1.02124
ILMN_1807833	HM13	327.601	324.571	364.924	385.64	375.083	449.256		1.26399	1.15087
ILMN_1685954	HMBS	324.327	294.756	285.881	289.652	226.177	235.788		0.746207	0.929654
ILMN_1726306	HMBS	589.003	551.471	523.058	471.974	371.92	461.276		0.73057	0.872473
ILMN_2344662	HMGA2	138.302	177.814	213.104	215.246	233.138	206.442		1.39056	1.35504
ILMN_2231242	HMGB1	239.543	267.21	234.244	246.868	220.42	179.475		0.789132	0.949402
ILMN_2219712	HMGB2	1003.47	920.87	819.933	874.124	784.114	550.818		0.693709	0.880331
ILMN_3251232	HMGN2	119.276	114.988	112.861	111.372	106.061	107.543		0.911809	0.957178
ILMN_2058141	HMGN2	2826.88	2556.28	2597.48	1792.52	2264.88	1902.26		0.774106	0.815505
ILMN_2409220	HMMR	592.695	626.64	524.206	537.905	468.83	347.699		0.669651	0.871057
ILMN_1781942	HMMR	605.197	619.808	562.938	494.625	395.124	352.241		0.610091	0.863313
ILMN_2334587	HNRNPC	427.975	504.426	463.471	435.909	372.574	332.366		0.756048	0.964585
ILMN_2321451	HNRNPD	5535.48	5786.41	5421.52	4344.94	5036.01	4600.92		0.851177	0.862618
ILMN_1743677	HNRNPU	137.081	157.893	153.064	152.991	122.92	127.275		0.848194	1.03757
ILMN_1690586	HNRPA1P4	2393.59	2519.74	2526.42	2024.22	1929.91	1945.88		0.788833	0.926182
ILMN_2101920	HNRPH1	465.543	451.782	434.356	471.23	391.124	338.106		0.794952	0.987203
ILMN_1654920	HNRPH3	568.663	527.76	547.705	547.591	361.127	432.701		0.724016	0.998972
ILMN_2395728	HNRPUL1	1217.19	1395.03	1415.34	1259.32	1084.65	1037.14		0.812258	1.0239
ILMN_1731349	HOXA13	115.302	110.129	103.89	99.9644	102.252	98.8751		0.892187	0.904284
ILMN_1794492	HOXC6	395.377	403.437	444.033	551.607	586.3	731.32		1.64947	1.2464
ILMN_2166457	HPGD	835.881	990.42	883.376	820.936	599.13	787.04		0.759004	0.933204
ILMN_2056975	HPRT1	1703.72	2005.01	2007.3	2331.29	1525	1473.8		0.808578	1.16983
ILMN_1831111		96.9951	98.2328	97.1062	96.8539	92.4595	91.4277		0.94191	0.993506
ILMN_1897741		457.946	494.376	505.812	451.161	405.764	415.925		0.862827	1.00488
ILMN_1872600		98.1714	96.0235	95.5543	100.858	107.48	104.073		1.08938	1.01142
ILMN_1855746		157.256	148.261	128.485	134.737	112.474	122.656		0.769616	0.861563
ILMN_1830069		116.506	119.462	113.884	119.893	104.156	107.965		0.898939	0.990718
ILMN_1890614		95.9233	100.483	108.44	106.417	104.533	118.353		1.13482	1.09394
ILMN_1826531		218.519	209.259	228.255	194.935	272.341	277.426		1.28517	0.989274
ILMN_1869897		162.918	186.995	202.054	182.816	243.568	269.298		1.46569	1.0999
ILMN_1863230		102.393	101.809	93.5425	98.5817	93.8057	95.5771		0.927427	0.940851
ILMN_1873863		102.311	101.259	104.433	103.945	110.152	111.617		1.0894	1.02362
ILMN_1865764		303.891	251.722	438.5	250.258	422.933	691.358		2.00552	1.23964
ILMN_1903021		93.3987	93.7172	102.877	96.8812	101.361	105.002		1.10286	1.06756
ILMN_1880406		558.98	566.921	542.571	512.62	479.15	406.436		0.786557	0.937197
ILMN_1819783		107.974	102.108	115.495	103.47	122.122	112.942		1.11892	1.04228
ILMN_1899338		97.3988	97.2605	92.2292	96.2955	91.4422	90.6266		0.93532	0.968485
ILMN_1912997		99.3474	99.3294	109.936	103.29	109.7	112.656		1.11919	1.07323
ILMN_1906110		107.222	107.014	102.941	103.638	96.8445	99.4813		0.916402	0.964259
ILMN_1849494		476.609	440.711	535.609	451.939	700.507	542.317		1.35484	1.07656
ILMN_1889555		136.214	125.745	117.7	135.338	120.447	111.121		0.883985	0.965941
ILMN_1841334		182.375	207.826	173.91	191.908	158.014	159.183		0.812908	0.93751
ILMN_1855286		94.0834	97.3828	94.4154	91.3556	99.9821	103.556		1.06305	0.970254
ILMN_1899940		125.945	117.857	115.734	117.254	111.625	111.731		0.916138	0.95564
ILMN_1862217		168.735	173.094	226.493	219.078	241.875	253.575		1.44941	1.30349
ILMN_1917290		138.98	126.612	138.28	123.427	107.484	120.352		0.857844	0.985371
ILMN_1856238		104.972	101.907	100.627	107.428	95.8743	95.8446		0.92672	1.00568
ILMN_1904243		93.6077	93.8753	101.519	95.7913	102.87	101.296		1.08898	1.05242
ILMN_1869119		101.709	97.2913	90.5071	91.3322	89.8168	94.0426		0.923917	0.913766
ILMN_1856374		133.842	112.051	104.02	112.066	97.7513	103.067		0.816688	0.878781
ILMN_1872457		126.731	133.764	152.999	146.785	146.957	163.621		1.19226	1.15082
ILMN_1874589		106.578	112.338	113.225	118.816	136.381	130.65		1.21978	1.05996
ILMN_1829845		428.474	559.336	294.185	280.305	250.888	324.342		0.582328	0.581579
ILMN_1861057		157.518	142.558	158.933	139.305	171.231	166.078		1.12408	0.993877
ILMN_1821483		102.128	100.829	104.775	104.667	109.362	107.881		1.07039	1.03195
ILMN_1830984		104.997	107.948	101.018	95.5061	98.1466	98.6227		0.92404	0.922891
ILMN_1874323		101.964	96.5131	90.8286	96.4458	88.923	90.8906		0.905967	0.943558
ILMN_1837298		106.655	105.467	104.02	102.48	96.0205	98.2936		0.916045	0.973493
ILMN_1885165		167.155	159.124	142.107	158.876	140.67	149.211		0.888442	0.92247
ILMN_1853876		155.079	144.685	143.748	158.145	124.772	118.948		0.813039	1.0071
ILMN_1857637		89.3005	90.8673	88.7476	90.6687	86.1521	84.6377		0.947949	0.995829
ILMN_1879326		149.981	154.139	116.528	141.94	113.844	113.053		0.746081	0.849891
ILMN_1841620		212.416	224.273	228.073	203.179	176.332	194.006		0.84806	0.98755
ILMN_1880052		209.592	207.102	188.705	175.42	157.942	152.521		0.745061	0.873841
ILMN_1906187		160.389	143.665	188.535	167.522	176.812	167.516		1.13246	1.17103
ILMN_1835521		106.513	103.809	102.112	100.182	101.972	100.425		0.962323	0.961832
ILMN_1870609		99.5242	98.6609	95.2247	101.524	92.1204	91.018		0.924078	0.992754
ILMN_1898723		269.511	300.216	360.69	339.036	408.594	372.531		1.37105	1.22818
ILMN_1809483	HSD17B14	110.81	119.506	130.848	114.894	129.491	159.365		1.25417	1.06698
ILMN_1779855	HSD17B6	100.536	92.3955	99.5699	98.0466	126.856	108.312		1.21892	1.02428
ILMN_1715324	HSD17B8	164.998	164.313	153.337	149.92	123.227	124.385		0.751909	0.920883
ILMN_1673711	HSP90AB1	2220.91	2205.49	2083.36	1858.06	1775	1773.16		0.801591	0.890434
ILMN_2096116	HSP90B1	3395.92	4032.2	3881.62	3153.2	4704.25	4744.67		1.27205	0.947052
ILMN_3236821	HSPBL2	343.119	376.049	401.221	428.141	479.99	480.073		1.33496	1.15323
ILMN_2256359	HSZFP36	157.83	148.004	144.308	145.517	122.466	134.63		0.840639	0.947654
ILMN_1747078	HYLS1	306.357	312.23	271.014	248.474	234.242	250.821		0.784146	0.839797
ILMN_2182198	ICT1	572.383	498.116	509.195	489.631	407.61	372.642		0.728868	0.933047
ILMN_2373632	IDH3B	1006.8	997.621	874.01	907.271	845.591	880.788		0.861285	0.888675
ILMN_1758626	IDS	597.778	780.339	711.795	587.319	962.967	845.236		1.31208	0.942674
ILMN_1682717	IER3	1197.71	981.943	1118.87	1723.17	1469.77	1424.74		1.32797	1.3039
ILMN_1694547	IFFO1	86.3244	89.495	94.2571	98.8154	96.8646	103.173		1.13774	1.09813
ILMN_1710937	IFI16	104.347	115.865	126.093	103.146	131.838	142.862		1.24744	1.04099
ILMN_1740319	IFI27L2	179.911	182.738	225.737	227.395	224.777	351.061		1.58787	1.24951
ILMN_3238560	IFI27L2	190.953	222.419	232.519	264.427	238.995	318.381		1.34837	1.20218
ILMN_1687384	IFI6	258.707	310.558	365.95	272.763	420.95	412.211		1.46358	1.122
ILMN_1765146	IFNAR2	215.097	174.456	173.984	162.204	150.695	160.593		0.79909	0.863012
ILMN_3245702	IFNE	97.6862	109.1	108.336	105.842	137.232	134.984		1.31641	1.03574
ILMN_1734781	IFNE1	89.7379	100.488	97.0763	100.093	119.025	112.383		1.21649	1.0365
ILMN_2097997	IFNE1	95.9456	105.927	105.12	104.849	131.56	134.408		1.3175	1.0401
ILMN_1673172	IFT52	156.972	154.707	160.61	177.017	171.824	193.518		1.17217	1.08325
ILMN_1807662	IGF2R	494.043	423.255	425.1	317.242	573.019	583.22		1.26048	0.80927
ILMN_2062468	IGFBP7	375.334	604.184	940.093	987.51	1727.78	1114.71		2.90193	1.96791
ILMN_1788107	IL11	184.937	240.979	409.669	945.096	530.491	343.542		2.05213	3.18082
ILMN_1724181	IL15	129.512	136.378	191.187	205.699	162.162	169.88		1.24879	1.49267
ILMN_2369221	IL15	96.9388	100.095	120.045	116.313	109.149	113.497		1.12999	1.19958
ILMN_1778010	IL32	129.322	111.969	159.295	175.866	181.499	215.057		1.64348	1.38903
ILMN_2368530	IL32	261.887	181.481	350.261	381.943	456.574	475.906		2.10318	1.65146
ILMN_2364376	ILK	1537.42	1586.5	1757.32	2181.46	2615.21	2167.18		1.53089	1.26084
ILMN_2358980	ILK	226.834	205.431	274.043	290.136	360.565	311.004		1.55361	1.30517
ILMN_1759419	ILVBL	293.876	293.884	284.477	290.21	256.529	241.829		0.847895	0.977758
ILMN_1769451	ILVBL	419.743	441.561	404.819	358.034	391.323	341.435		0.850755	0.885695
ILMN_1782579	IMMT	1243.95	1213.94	1111.05	1130.07	974.046	1107.8		0.847005	0.911804
ILMN_2094061	IMPA2	438.866	411.93	367.895	427.175	328.187	283.236		0.718648	0.934501
ILMN_1705737	IMPDH2	1180.86	1298.33	1227.9	1088.5	926.432	953.508		0.758288	0.934334
ILMN_1662243	ING1	144.181	137.105	131.84	129.138	126.494	128.014		0.904802	0.927802
ILMN_1671265	ING2	271.561	232.091	235.974	244.386	197.571	204.922		0.799149	0.953753
ILMN_2381603	ING3	129.575	130.672	126.592	126.233	112.877	116.665		0.882017	0.971482
ILMN_2237746	ING3	218.749	213.574	199.881	199.673	186.145	176.333		0.838442	0.924203
ILMN_1755911	ING5	135.325	116.464	113.175	115.186	101.847	112.018		0.849384	0.906954
ILMN_1667239	INPP1	320.848	385.2	453.377	457.394	522.621	508.123		1.45988	1.28995
ILMN_1728426	INPPL1	336.518	406.641	415.921	398.482	607.498	447.617		1.41977	1.09587
ILMN_1720540	INSL4	135.242	135.171	125.028	181.165	205.206	199.796		1.49771	1.13232
ILMN_1797668	INSM1	94.2397	92.8412	95.8979	105.071	100.653	101.151		1.0787	1.07424
ILMN_1679483	INTS10	571.601	566.613	544.147	492.63	465.388	490.901		0.840166	0.91088
ILMN_2360184	INVS	255.578	224.896	227.353	233.262	206.954	187.233		0.820412	0.958669
ILMN_1723117	IPO9	255.164	247.572	234.629	256.033	209.386	208.796		0.831815	0.975984
ILMN_2316104	IQCB1	240.787	252.657	222.272	238.655	191.481	198.142		0.7896	0.934104
ILMN_1662852	IQCK	259.431	212.425	190.664	183.343	174.678	150.91		0.690017	0.792629
ILMN_2081883	IQCK	637.575	495.201	442.228	399.478	407.268	301.501		0.625692	0.743047
ILMN_1811468	IRX3	267.84	430.404	444.993	502.79	535.862	560.144		1.56966	1.35738
ILMN_2054019	ISG15	155.235	164.727	177.305	190.319	216.464	244.429		1.44046	1.14896
ILMN_1764861	ISOC1	345.235	425.758	311.63	353.148	308.7	280.326		0.763983	0.862236
ILMN_1747934	ISYNA1	130.701	132.065	124.377	127.532	114.297	116.44		0.87811	0.958686
ILMN_1752283	ITCH	166.072	151.879	154.782	145.068	135.763	141.305		0.871418	0.943072
ILMN_1665792	ITGA2	354.492	603.041	578.818	357.215	701.366	984.764		1.76091	0.977547
ILMN_1792679	ITGA5	197.094	231.151	234.057	253.125	554.729	683.175		2.89065	1.13762
ILMN_1733324	ITGB3	94.0546	93.662	109.884	113.906	106.961	114.724		1.18096	1.19217
ILMN_1692790	ITGB3BP	227.577	219.205	206.425	200.965	190.56	180.766		0.831112	0.91183
ILMN_1751708	ITM2B	1180	1108.12	1241.89	1515.83	1426.24	1495.3		1.27683	1.20523
ILMN_1680453	ITM2C	257.708	294.589	325.918	299.158	377.224	350.639		1.31788	1.13177
ILMN_2366041	ITM2C	307.431	367.62	416.504	358.76	462.575	409.743		1.29223	1.14845
ILMN_1700432	ITPKB	96.091	95.208	101.711	98.9559	109.067	103.053		1.10884	1.04897
ILMN_1736103	ITPR2	99.3902	107.102	119.202	111.274	117.448	118.708		1.14366	1.11615
ILMN_1805192	ITPRIP	437.786	390.052	441.286	399.225	627.844	532.09		1.40116	1.01531
ILMN_3239181	ITPRIP	449.912	416.112	505.537	440.065	696.909	590.256		1.48629	1.09189
ILMN_1764177	JARID2	175.712	160.01	240.736	266.055	305.383	234.077		1.60687	1.50956
ILMN_1682727	JAZF1	120.419	123.829	146.709	135.373	142.487	128.693		1.11026	1.1549
ILMN_1722532	JMJD1A	171.132	156.339	191.596	155.621	216.726	210.344		1.30415	1.0603
ILMN_2412024	JMJD6	143.486	140.313	141.683	136.154	153.18	157.224		1.09375	0.978992
ILMN_1687275	JUB	208.891	191.589	180.586	185.955	153.702	178.186		0.828726	0.915255
ILMN_2366864	JUP	99.8747	98.344	96.023	98.1858	113.377	107.704		1.11534	0.97977
ILMN_1722533	KATNAL1	174.408	166.531	195.88	214.271	214.483	212.693		1.25294	1.203
ILMN_1716272	KBTBD8	93.3769	97.7291	99.5716	96.0289	100.606	103.554		1.0683	1.02352
ILMN_1669669	KCMF1	231.341	234.117	225.168	203.818	189.782	209.468		0.857759	0.921644
ILMN_1673769	KCNG1	229.411	280.185	453.6	452.61	406.228	346.051		1.47622	1.77829
ILMN_1711988	KCNK12	93.653	92.0188	96.6096	98.1251	104.43	106.656		1.13688	1.04881
ILMN_1701173	KCNK6	128.392	125.948	126.542	136.155	173.939	311.108		1.90708	1.03286
ILMN_2297765	KCNMA1	317.08	328.341	473.544	342.239	416.775	397.187		1.26113	1.26395
ILMN_1709937	KCNN4	139.589	143.447	135.648	147.798	153.133	164.568		1.12247	1.00145
ILMN_1777513	KCTD11	119.036	123.929	133.604	125.489	152.373	142.987		1.21565	1.06638
ILMN_2150187	KCTD18	136.798	132.818	132.209	117.951	117.328	113.623		0.856593	0.927835
ILMN_1718900	KCTD2	112.822	110.789	118.979	120.86	126.178	133.394		1.16082	1.07257
ILMN_1803476	KCTD20	227.893	195.532	173.651	248.972	255.631	277.013		1.25794	0.998107
ILMN_1800220	KCTD3	381.923	396.72	310.236	274.458	349.542	312.934		0.850809	0.750914
ILMN_2146372	KCTD6	259.517	307.219	230.072	232.367	244.854	221.307		0.822535	0.81597
ILMN_1651557	KDELC2	231.803	235.249	281.411	348.04	256.053	260.392		1.10576	1.34771
ILMN_1755727	KDM5B	186.037	205.044	244.225	205.924	250.497	301.719		1.41202	1.15104
ILMN_1654392	KHNYN	124.419	111.603	120.297	126.612	131.938	131.683		1.11693	1.04613
ILMN_1732150	KIAA0101	187.922	184.251	162.694	255.689	150.885	129.509		0.753397	1.12416
ILMN_1795704	KIAA0232	111.982	112.148	107.118	108.01	102.925	106.433		0.934093	0.959838
ILMN_1696127	KIAA0240	184.602	177.776	156.448	144.602	162.963	138.015		0.830563	0.830762
ILMN_2226917	KIAA0247	117.486	115.242	116.892	117.619	148.526	148.158		1.27481	1.00766
ILMN_2261882	KIAA0368	105.735	104.079	108.428	100.358	93.6733	93.829		0.893662	0.995103
ILMN_1697597	KIAA0494	277.91	292.752	313.84	265.831	320.707	402.357		1.26706	1.01579
ILMN_1692394	KIAA1024	102.121	94.0965	102.858	101.092	122.808	109.809		1.1855	1.03941
ILMN_1680643	KIAA1333	132.75	138.066	132.409	122.986	112.081	112.991		0.831088	0.94306
ILMN_2102960	KIAA1370	143.646	147.658	187.802	136.524	159.935	167.195		1.12298	1.11336
ILMN_1732609	KIAA1539	118.786	112.882	116.492	140.701	183.297	189.607		1.60965	1.11018
ILMN_1719876	KIAA1804	179.091	151.112	117.294	129.585	113.595	120.524		0.709014	0.747658
ILMN_2174380	KIAA1804	182.287	146.98	126.249	143.65	124.97	120.99		0.74699	0.819696
ILMN_1732967	KIAA1949	244.083	232.376	241.447	344.49	388.206	387.871		1.62884	1.22978
ILMN_1769140	KIAA1958	142.408	147.329	126.282	124.42	129.611	115.693		0.846645	0.865275
ILMN_2143155	KIF11	494.171	508.977	443.324	411.18	383.994	316.946		0.69874	0.851822
ILMN_1753063	KIF15	238.106	249.038	229.676	209.654	180.756	152.949		0.685022	0.901848
ILMN_1743034	KIF1B	125.322	135.629	145.087	124.277	150.782	153.347		1.16547	1.03224
ILMN_1712452	KIF20B	463.583	476.718	447.992	460.392	383.002	301.684		0.728156	0.966056
ILMN_1678810	KIF27	107.859	108.897	107.919	104.441	98.756	101.632		0.924487	0.97972
ILMN_1692572	KIF27	119.724	119.88	111.848	114.135	108.321	107.4		0.900319	0.94315
ILMN_2119224	KIFAP3	262.528	265.873	326.453	332.991	370.793	349.775		1.36368	1.248
ILMN_3238213	KILLIN	133.189	122.648	143.433	121.096	172.913	150.606		1.26455	1.03398
ILMN_1726901	KLC1	264.125	237.761	289.565	242.692	304.579	373.078		1.35022	1.06051
ILMN_1737406	KLF6	414.845	300.33	423.871	439.927	536.353	621.061		1.61836	1.20781
ILMN_1735014	KLF6	782.647	590.712	750.145	793.198	919.352	1184.37		1.53181	1.12377
ILMN_1702635	KLHDC10	99.3974	98.1961	104.818	103.019	115.024	114.887		1.16355	1.05184
ILMN_1748034	KLHDC4	301.058	320.534	281.989	259.273	265.058	270.894		0.862225	0.870767
ILMN_1701648	KLHL15	113.136	116.367	103.237	119.037	99.0189	100.067		0.867465	0.968499
ILMN_1678671	KLHL24	134.115	133.393	160.12	150.066	151.772	161.524		1.17116	1.15953
ILMN_3271092	KLRAQ1	197.426	201.485	216.775	185.587	223.849	243.96		1.17272	1.00865
ILMN_1658399	KLRG1	115.777	119.735	107.122	122.058	102.199	102.334		0.868464	0.973114
ILMN_1732516	KNTC1	298.61	335.757	271.275	283.224	274.192	209.433		0.762374	0.874099
ILMN_1721868	KPNA2	2222.61	2159.02	1940.95	1743.27	1794.33	1416.49		0.732791	0.840833
ILMN_1767579	KRR1	145.311	148.028	142.194	141.755	127.424	135.146		0.89511	0.967988
ILMN_1770663	KRT24	184.303	154.176	131.655	153.42	127.602	127.98		0.755091	0.842223
ILMN_1703226	KTI12	295.233	322.221	288.244	237.004	338.035	354.23		1.12116	0.850668
ILMN_1740523	KTN1	183.454	175.4	165.836	150.137	149.245	146.461		0.824029	0.880504
ILMN_1723211	L2HGDH	169.771	156.769	155.087	126.728	141.534	140.096		0.862467	0.863034
ILMN_2406035	LAMA3	136.888	123.532	106.327	102.332	94.5244	113.157		0.797484	0.801241
ILMN_1773567	LAMA5	2544.5	2641.13	1771.31	2629.11	2087.87	2131.38		0.813644	0.84858
ILMN_1752968	LAMB2	111.859	121.335	118.35	143.372	129.857	134.312		1.13283	1.12234
ILMN_1653824	LAMC2	213.186	184.537	203.428	190.497	362.057	246.725		1.53067	0.990449
ILMN_1701424	LAMC2	427.242	454.869	420.742	342.824	849.116	582.564		1.62301	0.865612
ILMN_1782292	LAMP1	1057.66	1105.53	1170.37	1042.65	1332.54	1305.28		1.21941	1.02304
ILMN_1659753	LAMP2	349.077	323.254	371.787	392.133	406.853	402.63		1.20399	1.13623
ILMN_2243687	LAMP2	643.806	561.362	720.945	588.72	711.806	725.596		1.1927	1.08671
ILMN_1685535	LARP1B	100.721	100.243	97.5247	95.7708	90.4411	93.1849		0.913723	0.961838
ILMN_2347888	LARP4	480.679	416.578	425.727	362.259	348.594	366.083		0.796513	0.878217
ILMN_1752810	LARP6	353.143	391.383	513.216	383.249	498.283	614.954		1.49523	1.20408
ILMN_1750321	LBA1	97.2375	96.7873	99.4641	94.7819	105.839	105.096		1.08715	1.00114
ILMN_1662932	LCP1	93.4539	94.0569	96.7074	94.0608	176.849	351.122		2.81568	1.01737
ILMN_2129563	LDLRAD3	125.366	131.621	133.477	126.524	109.302	116.918		0.880278	1.01173
ILMN_1731966	LEPR	89.724	89.009	88.2859	91.4432	98.0141	94.6643		1.07802	1.00557
ILMN_2234956	LEPR	130.496	110.407	123.552	110.822	158.526	139.786		1.23831	0.972901
ILMN_1657373	LEPREL1	562.35	768.927	701.538	589.905	1005.26	828.88		1.37773	0.970079
ILMN_1705682	LEPREL2	116.339	136.288	152.039	174.989	175.661	143.41		1.26301	1.29451
ILMN_1723978	LGALS1	3520.16	3807.42	4908.13	5245.79	5965.36	6050.37		1.63979	1.38571
ILMN_1661708	LGALS7	97.5776	96.1033	95.9721	92.0327	88.8907	90.1745		0.924537	0.970693
ILMN_2332964	LGMN	174.626	196.341	245.609	211.237	299.021	225.218		1.41317	1.2315
ILMN_1698019	LGMN	311.107	362.825	451.397	392.26	603.868	450.804		1.56495	1.25184
ILMN_1807016	LHX2	214.048	238.044	215.081	206.595	188.284	175.963		0.80569	0.932722
ILMN_1736077	LIAS	216.373	212.806	193.277	177.67	158.393	184.792		0.799634	0.864319
ILMN_1704369	LIMA1	132.55	104.963	108.9	93.9393	164.498	172.199		1.4176	0.854014
ILMN_1724062	LIN54	146.865	142.789	140.024	151.747	133.05	123.909		0.887124	1.00731
ILMN_2137084	LIN9	168.587	161.229	153.408	147.716	141.34	135.037		0.837974	0.913006
ILMN_1733559	LOC100008589	1057.34	1059.32	1532.27	1681.72	1294.39	1537.36		1.33784	1.51842
ILMN_3262250	LOC100125556	109.027	112.2	109.705	102.41	99.3451	99.2311		0.897613	0.958809
ILMN_3176771	LOC100127915	89.9705	88.9715	95.7798	97.7586	97.0745	96.5339		1.08196	1.08157
ILMN_3179891	LOC100128007	191.353	178.246	170.241	161.173	158.206	126.843		0.771238	0.896688
ILMN_3187254	LOC100128016	131.085	125.342	127.99	124.055	116.933	116.866		0.911756	0.98291
ILMN_3182893	LOC100128163	111.037	107.955	108.006	102.113	99.7801	99.3577		0.909339	0.959485
ILMN_3252724	LOC100128203	99.9134	98.3459	102.351	95.7927	91.5981	93.184		0.932023	0.999418
ILMN_3268914	LOC100128410	8100.45	7838.19	7469.19	7182.59	6637.41	6448.42		0.821013	0.919262
ILMN_3247452	LOC100128731	2805.8	2767.39	3058.23	3278.37	3174.54	3194.81		1.14286	1.13698
ILMN_3263918	LOC100129201	267.39	276.398	267.012	252.669	243.699	223.829		0.859762	0.95567
ILMN_3191227	LOC100129267	333.915	350.545	320.133	291.837	271.123	218.786		0.715759	0.894092
ILMN_3195119	LOC100129744	99.0233	94.2907	96.2756	93.5435	89.1454	90.7257		0.930461	0.981921
ILMN_3261938	LOC100130154	832.014	784.853	1063.33	877.797	1131.67	1067.55		1.36017	1.20055
ILMN_3188099	LOC100130190	173.898	167.822	177.359	154.31	152.503	143.676		0.866731	0.970586
ILMN_3267670	LOC100130550	265.864	236.838	225.31	217.059	219.289	202.045		0.838138	0.879982
ILMN_3273047	LOC100130769	156.275	153.331	145.131	127.166	140.229	125.785		0.859201	0.879496
ILMN_3295075	LOC100131531	2119.19	1999.59	1734.69	1898.47	1832.73	1543.36		0.819682	0.882095
ILMN_3292224	LOC100131609	2046.89	1889.63	1959.47	1752	1421.52	1399.27		0.716571	0.942831
ILMN_3215712	LOC100131609	4390.04	4314.03	4294.73	4206.89	3393.67	3453.11		0.786617	0.976739
ILMN_3219340	LOC100131713	1942.25	2024.22	2624.23	2328.62	2412.22	2347.55		1.2	1.24868
ILMN_3275696	LOC100131940	1549.56	1570.53	1432.39	1366.61	1231.25	1116.01		0.752305	0.897091
ILMN_3203444	LOC100132535	284.601	379.683	451.925	423.203	482.794	526.022		1.51865	1.3174
ILMN_3212312	LOC100132658	94.1587	94.8994	90.1226	90.2528	89.979	88.4537		0.943799	0.954074
ILMN_3211935	LOC100132715	2190.77	2218.74	2050.85	1799.97	1746.14	1751.12		0.793118	0.8733
ILMN_3289172	LOC100132774	140.065	138.08	112.852	131.525	118.272	115.396		0.840095	0.878596
ILMN_3240003	LOC100133012	221.408	204.781	192.559	176.22	184.517	178.954		0.85284	0.865294
ILMN_3283015	LOC100133185	699.4	578.323	612.854	678.047	538.049	484.043		0.799932	1.01031
ILMN_3243291	LOC100133372	3942.76	4101.06	3986.64	3502.87	3153.87	3276.74		0.799447	0.931087
ILMN_3237584	LOC100133489	146.693	146.555	128.642	124.287	128.497	130.042		0.881643	0.862513
ILMN_3287952	LOC100133800	661.132	666.684	549.926	640.448	475.998	380.311		0.6449	0.89649
ILMN_3244779	LOC100133982	99.5	99.1276	92.5738	92.2518	92.6527	94.9771		0.944631	0.930513
ILMN_3237946	LOC100134134	485.645	823.178	1002.15	779.248	1496.41	899.062		1.83025	1.36107
ILMN_3239785	LOC100134304	308.284	315.001	255.94	244.121	235.92	254.595		0.786983	0.802298
ILMN_1718030	LOC133491	99.8165	99.8154	98.3073	98.0194	95.7343	96.1777		0.961329	0.983443
ILMN_1726682	LOC146909	290.755	223.64	157.819	226.084	160.817	165.903		0.635153	0.746321
ILMN_3235597	LOC147727	132.839	116.766	110.355	114.908	109.601	104.436		0.857501	0.902473
ILMN_1776052	LOC148915	1452.14	1413.14	1439.5	972.601	1052.15	985.341		0.711094	0.841836
ILMN_3238058	LOC151162	410.93	427.245	449.577	353.647	532.865	569.56		1.31527	0.958301
ILMN_1721102	LOC255326	193.636	162.711	143.286	158.683	138.878	142.689		0.790148	0.847402
ILMN_3274904	LOC284230	9880.87	9542.08	9023.29	10864.5	8431.82	6768.39		0.782591	1.02393
ILMN_1809998	LOC285095	154.208	122.423	101.467	120.565	107.518	107.441		0.777058	0.802628
ILMN_1657612	LOC285900	6009.42	5682.63	5564.6	5809.22	5002.57	3728.9		0.746787	0.972783
ILMN_1800795	LOC340260	133.642	135.26	128.992	126.229	118.532	117.549		0.877946	0.949123
ILMN_1674782	LOC375295	408.252	413.324	474.07	594.996	509.292	510.476		1.24123	1.30124
ILMN_3233442	LOC387825	1420.4	1409.72	1713	1495.67	1234.63	1189.71		0.85662	1.13376
ILMN_1652763	LOC389203	122.575	114.5	113.812	118.052	105.568	106.514		0.894576	0.97802
ILMN_3278735	LOC389465	169.756	165.732	152.173	141.3	138.927	133.708		0.812654	0.874765
ILMN_2249018	LOC389816	168.35	171.435	140.955	177.534	131.022	146.386		0.816423	0.937326
ILMN_3286813	LOC391019	1019.68	1038.56	868.414	924.044	789.449	795.309		0.769958	0.87087
ILMN_3245390	LOC392635	153.38	148.666	146.15	129.461	139.304	130.365		0.892811	0.912485
ILMN_3284114	LOC399748	1196.85	1175.8	1299.41	1155.7	1554.07	1485.6		1.28113	1.03475
ILMN_3284119	LOC399804	6885.92	6555.12	6210.82	5517.14	5163.74	5979.47		0.829044	0.872548
ILMN_3244176	LOC399959	127.191	141.019	130.891	166.069	165.512	249.612		1.54776	1.10719
ILMN_1754865	LOC400455	624.392	603.725	607.673	642.099	494.302	458.475		0.775803	1.01763
ILMN_1783712	LOC400506	295.112	257.404	263.679	216.929	227.47	208.801		0.789609	0.869854
ILMN_3289247	LOC400750	101.872	101.215	103.553	103.329	110.189	114.601		1.10686	1.01868
ILMN_1739335	LOC400948	1656.8	1566.61	1797.13	2108.57	1952.91	1827.83		1.1729	1.21167
ILMN_1668629	LOC401115	2390.18	2710.77	3517.87	3602.83	3635.06	3812.54		1.46004	1.39595
ILMN_1893633	LOC439949	276.145	287.95	252.273	265.801	237.913	237.901		0.843501	0.918416
ILMN_1715693	LOC440160	468.414	460.374	466.621	450.144	392.495	377.097		0.828597	0.987055
ILMN_3199438	LOC440366	109.947	108.122	106.389	106.896	100.961	99.7498		0.920401	0.978062
ILMN_1770994	LOC440900	97.8774	92.5506	99.5863	99.0868	139.233	116.051		1.34058	1.0433
ILMN_1761281	LOC441019	124.154	143.828	141.894	220.391	181.89	185.545		1.37112	1.3519
ILMN_1763999	LOC441282	474.876	354.119	271.694	309.532	219.852	302.269		0.629824	0.701122
ILMN_3213925	LOC441481	133.457	145.647	154.077	180.358	189.156	168.948		1.28305	1.19825
ILMN_3215759	LOC441484	294.817	282.019	266.042	272.136	218.405	226.62		0.771496	0.932985
ILMN_3215268	LOC441714	136.88	135.273	128.568	126.525	119.131	122.351		0.887305	0.937312
ILMN_3283592	LOC442609	159.568	156.58	172.892	153.948	181.287	178.481		1.13797	1.03382
ILMN_3247645	LOC550643	1528.26	1459.2	1929.37	2221.69	1809.27	2459.4		1.42886	1.3895
ILMN_3237507	LOC552889	214.674	203.206	222.976	198.982	253.2	254.478		1.21489	1.00976
ILMN_1681300	LOC641806	112.249	105.256	103.812	102.135	99.8396	99.0812		0.914555	0.946856
ILMN_1696027	LOC642333	350.895	364.509	397.9	394.115	406.854	458.503		1.20961	1.10709
ILMN_1773175	LOC642399	188.513	148.689	122.687	136.905	122.709	128.003		0.743505	0.769839
ILMN_3286312	LOC642458	126.994	125.392	120.579	112.567	110.041	105.895		0.855579	0.923766
ILMN_3200921	LOC642590	1629.38	1816.34	1925.83	2424.11	1974.54	2188.2		1.20809	1.26241
ILMN_3217262	LOC642812	127.397	125.064	120.313	116.658	120.819	112.845		0.925547	0.938648
ILMN_1695034	LOC642817	1757.89	1795.17	1743.36	1639.05	1420.15	1406.66		0.795598	0.951972
ILMN_1724295	LOC643007	255.636	274.125	287.034	329.562	233.887	218.992		0.854875	1.16392
ILMN_1757278	LOC643300	362.774	366.556	337.271	380.716	256.651	286.086		0.744158	0.984448
ILMN_3219806	LOC643384	385.568	448.947	405.945	281.238	342.252	311.157		0.78298	0.823452
ILMN_3280735	LOC643507	348.907	343.348	316.257	241.038	293.133	292.723		0.846302	0.805044
ILMN_1721659	LOC643668	1823.32	1859.32	1517.7	1553.07	1431.9	1164.09		0.704924	0.833849
ILMN_1665060	LOC643888	111.439	114.485	111.175	100.55	101.505	104.445		0.911587	0.937148
ILMN_1745599	LOC643977	125.764	127.247	145.474	135.795	154.292	150.682		1.20538	1.11168
ILMN_1661917	LOC644039	11474.2	12016.9	13461.7	12525.7	12630.1	13582.7		1.11587	1.10627
ILMN_1747924	LOC644254	129.31	126.68	114.157	142.402	113.737	107.667		0.864894	1.00222
ILMN_1700387	LOC644295	99.7173	102.13	97.4859	97.9757	96.4823	92.2991		0.935268	0.968364
ILMN_3207122	LOC644563	1315.91	1180.26	1225.25	1268.19	1016.74	915.117		0.773928	0.998905
ILMN_3236774	LOC644632	99.1659	94.8139	99.9419	104.52	112.005	106.075		1.12424	1.05404
ILMN_1712518	LOC644733	105.451	105.123	102.343	103.96	98.7718	96.5248		0.927448	0.979715
ILMN_1722409	LOC644816	114.006	112.07	114.314	99.2916	102.572	100.455		0.898047	0.94484
ILMN_1696186	LOC644889	139.562	131.394	127.801	128.021	119.037	114.744		0.862798	0.944144
ILMN_1676792	LOC645138	5031.2	4780.65	5327.99	4925.2	4181.48	4046.93		0.83862	1.04498
ILMN_3237991	LOC645166	375.087	513.296	575.213	678.62	855.458	607.848		1.64716	1.41136
ILMN_3239168	LOC645332	170.176	191.527	185.828	160.034	144.27	163.138		0.849891	0.956206
ILMN_1720745	LOC645385	5513.16	5307.49	5509.74	5437.34	4271.47	4395.57		0.800971	1.01168
ILMN_3199955	LOC645430	170.031	163.752	168.904	178.608	152.652	141.304		0.880682	1.04113
ILMN_1691611	LOC645436	4281.69	3949.85	4363.97	4402.86	2891.48	3483.99		0.774517	1.06503
ILMN_1669901	LOC645478	97.529	96.9965	90.4543	93.7775	91.6443	88.9563		0.928417	0.947083
ILMN_1660133	LOC645566	105.631	109.597	103.015	100.403	100.715	98.983		0.927848	0.945134
ILMN_1776047	LOC646197	526.811	527.942	448.279	409.104	444.571	395.517		0.796479	0.812876
ILMN_1732328	LOC646200	5025.86	5217.38	4890.28	4736.65	3918.87	4422.84		0.814362	0.939833
ILMN_1673738	LOC646483	3728.41	3649.26	3846.83	3846.65	3103.64	2428.89		0.749901	1.04281
ILMN_3288755	LOC646808	141.622	143.774	134.142	132.975	121.413	122.191		0.853564	0.935951
ILMN_3199755	LOC646821	248.458	242.181	274.847	274.44	306.543	312.036		1.26076	1.11953
ILMN_1692545	LOC646849	2918.5	2775.59	2635.87	2468.39	2016.72	2313.34		0.760447	0.896412
ILMN_3284447	LOC647150	256.083	264.407	252.004	245.642	218.188	218.252		0.838517	0.956109
ILMN_1732313	LOC647195	223.529	201.089	186.196	180.882	181.065	178.295		0.846313	0.864489
ILMN_1661346	LOC648210	2340.98	2226.78	2020.86	2498.48	1783.96	1900.22		0.806561	0.9894
ILMN_1715947	LOC648210	3827.82	3761.71	4227.86	3904.39	2830.59	3067.22		0.777098	1.07151
ILMN_1732074	LOC648210	6773.99	6786.47	6519.84	5695.13	5474.6	5017.82		0.77375	0.900779
ILMN_1758106	LOC648256	93.3935	90.9492	95.575	97.7979	101.147	104.172		1.11379	1.04899
ILMN_1700880	LOC648399	170.887	151.971	171.953	191.954	182.139	207.322		1.20629	1.12714
ILMN_3242077	LOC648742	106.848	110.35	109.316	108.212	119.01	124.544		1.12135	1.00152
ILMN_1730328	LOC649853	138.056	117.984	108.81	126.959	107.486	101.799		0.817394	0.920831
ILMN_1759344	LOC652226	117.605	113.278	108.375	108.165	101.786	102.022		0.882736	0.937878
ILMN_2098418	LOC652968	140.563	149.611	142.726	187.729	165.177	175.893		1.1754	1.13881
ILMN_1755514	LOC653071	95.8661	98.2574	91.6474	97.1087	90.6106	92.8023		0.944826	0.97235
ILMN_1665581	LOC653175	115.754	114.425	103.759	107.753	105.544	97.1348		0.880525	0.918901
ILMN_1657279	LOC653706	94.2229	92.4458	88.2744	96.2476	87.9993	88.4422		0.945212	0.9885
ILMN_1701882	LOC653820	297.568	275.482	211.513	195.709	189.033	203.291		0.684625	0.710621
ILMN_1723433	LOC653820	141.997	142.611	162.283	157.043	156.547	166.118		1.13372	1.12199
ILMN_1778543	LOC653874	481.32	417.879	336.087	394.611	304.226	296.386		0.667942	0.812611
ILMN_1697665	LOC653972	433.722	401.186	381.759	357.852	362.914	319.875		0.817802	0.885859
ILMN_1696946	LOC654174	139.61	157.672	140.517	159.001	171.56	186.302		1.20377	1.00752
ILMN_1671451	LOC654201	88.382	94.7532	105.204	96.1959	102.217	106.518		1.13979	1.09973
ILMN_1716445	LOC727761	1047.83	934.411	908.924	821.936	811.3	654.568		0.739502	0.873185
ILMN_1677714	LOC727773	119.974	111.654	110.016	115.636	101.858	103.063		0.884705	0.974203
ILMN_3235234	LOC727924	135.814	125.045	136.017	132.412	113.069	102.17		0.825119	1.02902
ILMN_3275422	LOC727963	111.317	108.077	105.073	100.039	100.465	101.65		0.92124	0.934897
ILMN_1668743	LOC728069	142.758	150.058	154.203	168.269	164.901	176.186		1.16485	1.10128
ILMN_3295922	LOC728257	139.396	124.622	124.72	112.863	114.989	109.199		0.849138	0.899872
ILMN_3225246	LOC728463	107.449	97.9043	94.9584	98.6932	90.3948	94.9689		0.902658	0.943017
ILMN_3233589	LOC728467	211.46	222.781	219.733	201.817	189.532	186.652		0.866303	0.970775
ILMN_3225075	LOC728530	98.299	100.642	92.0375	90.0649	87.6086	92.5715		0.905695	0.915357
ILMN_3225300	LOC728532	499.494	465.706	528.829	488.208	549.559	575.83		1.16596	1.05371
ILMN_1771734	LOC728564	1301.76	1368.97	1181.75	1052.05	1056.66	1085.27		0.802005	0.836399
ILMN_3227912	LOC728576	7984.2	8191.98	8235.53	7898.56	8603.22	8720.12		1.07092	0.997398
ILMN_3226214	LOC728755	187.747	183.221	165.633	214.6	235.107	216.194		1.21655	1.02497
ILMN_3297455	LOC729082	327.571	286.145	258.278	316.298	246.951	222.559		0.765028	0.936224
ILMN_3230435	LOC729086	778.852	695.977	994.548	778.633	1172.52	966.978		1.45068	1.2023
ILMN_3304022	LOC729102	4923.24	4422.07	4760.63	4431.35	3989.59	4026.01		0.857713	0.983592
ILMN_3228294	LOC729279	1004.05	1169.38	1342.4	1200.73	1197.42	1386.7		1.18896	1.1701
ILMN_3236877	LOC729362	220.077	198.953	207.041	209.111	156.01	164.255		0.7643	0.993133
ILMN_3228094	LOC729438	98.903	97.8812	97.4294	99.7314	91.9657	93.7024		0.943511	1.00191
ILMN_3245433	LOC729462	87.449	86.8853	89.1082	96.6256	83.3008	84.1572		0.960557	1.06539
ILMN_3222998	LOC729513	145.907	166.655	133.305	151.459	124.528	131.334		0.8186	0.911068
ILMN_3306019	LOC729535	198.485	183.491	168.222	174.411	164.762	164.5		0.861997	0.897001
ILMN_3226613	LOC729686	998.229	818.537	804.397	759.528	601.408	693.009		0.712484	0.860829
ILMN_3228595	LOC729768	1019.79	1026.35	1077.12	1190.65	1338.43	1609.79		1.44087	1.10831
ILMN_3220861	LOC729952	127.765	120.501	115.872	120.747	109.869	99.3497		0.842718	0.953082
ILMN_3306482	LOC730107	1323.78	1184.5	1137.46	1431.51	911.815	919.193		0.729984	1.02419
ILMN_3306028	LOC730183	113.24	106.572	106.849	110.227	98.4894	101.13		0.908138	0.987558
ILMN_3305949	LOC730246	6266.09	5454.89	5786.11	5909.31	4653.07	4820.52		0.808259	0.997819
ILMN_3241234	LOC730278	2448.53	2183.05	2795.55	2556.12	3116.53	3280.65		1.38121	1.15547
ILMN_3238048	LOC730324	281.231	269.813	261.008	266.484	250.142	224.733		0.861773	0.95726
ILMN_1689327	LOC730534	2901.12	2694.41	2607.8	1846.31	2188.99	1980		0.745057	0.796012
ILMN_3297679	LOC730535	165.372	157.553	149.87	155.953	132.934	128.712		0.810237	0.947038
ILMN_1719344	LOC730820	278.851	253.439	289.377	261.064	293.839	344.517		1.19926	1.0341
ILMN_1709936	LOC90624	179.994	176.741	171.371	166.307	160.603	160.445		0.899965	0.946581
ILMN_1734445	LOC91461	100.801	101.233	91.1963	100.251	89.7785	91.3993		0.896771	0.947599
ILMN_2151277	LPGAT1	104.056	111.982	100.92	96.966	98.222	99.6429		0.915878	0.915978
ILMN_1742789	LPXN	147.127	190.543	209.833	188.465	371.108	275.721		1.91556	1.17955
ILMN_2157075	LRCH4	137.724	143.19	134.746	151.487	157.883	170.495		1.16897	1.01894
ILMN_1670272	LRP10	390.989	412.412	378.71	594.082	611.977	536.454		1.42946	1.21084
ILMN_1755383	LRRC1	280.705	284.324	212.768	246.667	230.878	230.587		0.816709	0.813117
ILMN_3251467	LRRC58	330.237	288.511	279.542	183.19	222.188	231.457		0.733165	0.747851
ILMN_1763409	LRRC8D	198.005	205.497	177.116	175.135	183.217	173.229		0.883378	0.872984
ILMN_1696004	LRRK1	138.287	149.34	132.091	142.746	121.104	123.293		0.849704	0.955535
ILMN_2092693	LSM12	386.945	403.943	390.212	281.033	343.376	344.094		0.869239	0.848724
ILMN_2079803	LSM14A	1087.86	1140.6	1128.55	1021.34	1026.07	946.427		0.885139	0.96474
ILMN_2355225	LSP1	129.46	139.793	170.257	164.523	153.734	160.965		1.16879	1.24337
ILMN_2363498	LSR	96.399	96.5886	102.661	110.637	103.918	110.384		1.11045	1.10524
ILMN_1805395	LTBP3	170.619	218.327	248.275	269.646	300.125	287.673		1.51126	1.3316
ILMN_2221564	LYAR	694.94	700.899	558.161	759.215	556.645	472.895		0.737578	0.943788
ILMN_2306189	MAGED1	316.376	396.355	511.132	454.536	456.811	633.107		1.52922	1.35489
ILMN_1659659	MAGEH1	139.216	135.703	148.265	137.5	168.185	229.507		1.44658	1.03945
ILMN_1679391	MAMDC2	86.913	87.5471	93.7825	91.7851	97.6558	96.3083		1.1118	1.06367
ILMN_1803060	MAML1	111.438	113.872	108.891	102.761	120.417	117.806		1.05731	0.939383
ILMN_1680856	MAMLD1	155.894	186.553	230.541	248.812	244.195	198.904		1.29392	1.39979
ILMN_1776188	MAP1LC3A	273.708	291.797	326.793	409.309	474.744	628.401		1.95073	1.30167
ILMN_2100693	MAP2K4	202.104	206.657	175.123	198.991	171.268	174.246		0.845271	0.91524
ILMN_1723020	MAP3K1	228.369	227.93	206.455	181.198	150.878	200.323		0.769671	0.84956
ILMN_1723625	MAP4K2	446.577	497.731	555.005	570.982	604.12	606.086		1.28158	1.19239
ILMN_1662557	MAP7D3	132.93	125.469	134.819	133.971	113.771	116.256		0.8902	1.04021
ILMN_1734290	MAPRE3	106.739	116.98	117.303	128.11	125.609	130.555		1.14502	1.09697
ILMN_1799819	MARS	606.174	588.465	540.953	463.577	459.986	424.523		0.740398	0.840865
ILMN_2296369	MATR3	131.645	128.746	121.923	123.183	105.445	106.072		0.812306	0.9413
ILMN_1815107	MATR3	3272	3154.05	3210.14	2632.47	2771.71	2345.73		0.796358	0.909206
ILMN_2411076	MATR3	393.958	428.678	377.057	330.936	324.792	258.516		0.709072	0.86064
ILMN_1802457	MAX	112.352	108.838	105.094	115.74	102.851	103.125		0.931217	0.998389
ILMN_1777853	MBOAT2	135.508	143.802	176.583	176.354	232.118	178.256		1.46925	1.2636
ILMN_1651719	MBTPS1	362.262	382.85	401.003	379.227	468.847	446.101		1.22793	1.04713
ILMN_1767256	MBTPS1	149.732	149.478	159.798	151.926	181.226	174.847		1.19004	1.04182
ILMN_2198499	MCART1	115.68	110.088	110.361	124.63	107.177	105.138		0.94041	1.04085
ILMN_1803988	MCL1	313.211	347.159	428.693	321.264	413.132	382.764		1.20523	1.13566
ILMN_2413899	MCM10	197.217	180.019	168.13	163.118	144.302	137.968		0.748258	0.87809
ILMN_2413898	MCM10	544.832	543.297	445.13	416.278	381.504	321.472		0.646041	0.791641
ILMN_1681503	MCM2	291.403	271.959	247.744	236.832	241.928	196.214		0.777727	0.860149
ILMN_1806818	MCM3	421.46	389.895	370.204	323.778	319.916	303.428		0.768276	0.855338
ILMN_2224143	MCM3	1959.55	1923.86	1818.03	1546.8	1570.74	1415.87		0.769069	0.866464
ILMN_1798654	MCM6	1600.85	1794.61	1505.94	1340.89	1204.85	1095.38		0.677441	0.838423
ILMN_1663195	MCM7	3880.29	4104.64	3110.18	3138.25	3096.53	2123.36		0.653718	0.782527
ILMN_2407124	MCM8	249.693	260.523	207.654	199.696	191.088	191.669		0.750184	0.798387
ILMN_1800181	MCMDC1	95.7583	96.6185	93.8957	96.5195	87.6393	92.0206		0.933896	0.989804
ILMN_1713147	MCRS1	182.047	175.4	166.592	160.359	150.506	156.072		0.857688	0.914683
ILMN_2349393	MDK	114.351	122.886	162.825	176.555	146.907	137.409		1.19845	1.43055
ILMN_1777526	MED20	985.272	924.848	960.256	647.246	859.014	821.328		0.879705	0.841571
ILMN_3306173	MED7	262.344	213.761	231.817	200.562	183.635	193.273		0.791648	0.908158
ILMN_1671149	MEG3	95.8362	107.911	108.734	127.209	114.723	121.155		1.1577	1.15802
ILMN_3241441	MEGF6	116.386	113.653	102.855	98.0635	99.6639	107.118		0.898896	0.873407
ILMN_2212909	MELK	1067.16	973.507	793.948	867.036	800.175	647.103		0.709219	0.813943
ILMN_1731184	MELK	628.864	638.093	503.888	526.901	514.324	412.628		0.731637	0.813594
ILMN_1670420	METAP2	1924.27	1978.21	1640.72	2002.66	1721.43	1632.21		0.859361	0.933609
ILMN_1655780	METTL10	118.341	115.179	109.092	107.092	103.067	108.168		0.904571	0.925764
ILMN_1655635	METTL3	347.42	342.597	286.924	318.062	278.859	275.837		0.803886	0.876768
ILMN_1661998	METTL6	181.791	166.498	174.154	152.149	148.37	161.006		0.888273	0.936875
ILMN_1708782	MFAP3	136.744	171.415	166.079	161.946	192.291	193.308		1.2513	1.06447
ILMN_3233272	MGC23284	101.844	98.7068	101.368	102.924	105.467	109.534		1.07205	1.01865
ILMN_1759991	MGC3731	530.488	505.604	430.894	487.136	381.533	393.958		0.748476	0.88605
ILMN_1663575	MGC87042	250.805	295.143	301.249	255.759	344.402	423.024		1.40568	1.02026
ILMN_1761858	MID1	479.678	555.57	442.834	407.97	379.569	365.958		0.720144	0.821836
ILMN_1746408	MIDN	259.263	235.957	251.097	262.813	302.27	277.402		1.17053	1.03774
ILMN_3308813	MIR599	111.419	113.324	108.089	109.37	98.6256	101.823		0.891902	0.967592
ILMN_1677133	MITD1	521.955	497.624	462.253	373.264	352.125	372.868		0.711071	0.819472
ILMN_1654060	MKNK2	107.087	102.419	98.2113	126.868	118.647	132.465		1.1986	1.07434
ILMN_1679438	MLF1IP	148.671	162.318	134.809	141.916	140.712	123.278		0.848873	0.889826
ILMN_1788363	MLH1	445.56	462.609	419.748	408.588	348.144	369.894		0.790643	0.912093
ILMN_3237986	MMGT1	332.639	353.18	389.573	344.246	409.239	394.81		1.17239	1.06999
ILMN_1741847	MMP10	89.7513	92.0126	90.6743	89.5616	102.141	105.304		1.14129	0.991594
ILMN_2148796	MND1	238.657	236.061	208.322	214.381	180.026	166.794		0.73058	0.890429
ILMN_1671906	MND1	259.418	215.93	201.953	193.197	181.782	159.971		0.718954	0.831285
ILMN_1711462	MNS1	136.869	138.66	137.818	117.889	115.524	114.341		0.834267	0.928058
ILMN_2157240	MNS1	267.254	275.679	274.812	194.889	227.966	200.388		0.788962	0.865116
ILMN_1697200	MON2	253.975	264.591	262.38	282.561	308.325	315.426		1.20284	1.05086
ILMN_1666156	MORF4L2	1661.99	1818.03	1644.84	1481.63	2177.89	2526.99		1.35197	0.898405
ILMN_1805345	MOSPD3	123.799	128.533	122.141	132.516	139.795	135.89		1.09256	1.00922
ILMN_1705579	MPP4	85.7505	91.1397	85.8786	97.1808	96.6861	99.1333		1.10701	1.03488
ILMN_1750689	MPP5	305.801	272.794	273.147	275.149	256.174	253.218		0.880396	0.947635
ILMN_1691090	MPV17	257.099	267.912	265.452	308.687	302.371	299.824		1.14701	1.09358
ILMN_2167416	MR1	132.683	136.084	122.881	108.59	163.824	202.212		1.36191	0.861229
ILMN_1709483	MRE11A	166.021	165.801	157.693	148.701	145.048	149.3		0.887065	0.923371
ILMN_2410965	MRI1	244.111	306.377	218.087	249.801	207.368	215.081		0.767407	0.849951
ILMN_1806828	MRI1	126.086	132.742	116.238	121.828	112.813	113.212		0.87326	0.919784
ILMN_1732089	MRI1	410.75	520.071	403.926	425.182	338.671	337.571		0.726499	0.890727
ILMN_1806123	MRPL23	1029.91	882.976	857.065	941.065	741.534	644.739		0.7247	0.940006
ILMN_2398995	MRPL24	718.611	647.258	602.006	365.179	520.741	482.968		0.73485	0.708109
ILMN_1695576	MRPL24	1368.66	1205.41	1055.84	645.693	910.122	866.939		0.690371	0.661027
ILMN_1726417	MRPL33	2032.63	1664.12	1686.25	1882.36	1325.15	1435.73		0.74684	0.965339
ILMN_1687403	MRPL40	443.255	363.697	353.637	369.977	311.032	317.801		0.77927	0.896725
ILMN_1658486	MRPL54	552.552	470.016	424.157	487.253	390.149	280.48		0.655829	0.891295
ILMN_1721337	MRPS18B	190.053	189.231	190.704	161.277	158.414	173.186		0.874281	0.928013
ILMN_1655765	MRPS21	2495.19	2022.02	2005.32	2443.27	1632.49	1814.63		0.763108	0.984809
ILMN_1655377	MRPS22	896.318	821.904	757.105	743.431	743.196	740.508		0.863512	0.873308
ILMN_1718424	MRPS28	632.432	570.391	576.391	607.095	428.148	484.6		0.758839	0.983924
ILMN_1772722	MRPS33	207.358	213.146	201.491	214.644	250.869	285.743		1.27612	0.989611
ILMN_1729051	MSH6	1957.02	1901.25	1755.1	1821.94	1530.91	1349.57		0.746575	0.92711
ILMN_1659895	MSN	1150.18	1150.87	1524.28	1519.78	2225.83	2336.29		1.98263	1.3229
ILMN_2228180	MSRA	203.446	229.386	269.738	224.187	301.612	265.351		1.30989	1.14115
ILMN_1657977	MSRB2	716.116	754.819	918.959	970.896	1153.14	965.388		1.44026	1.2848
ILMN_1779333	MSRB3	107.472	98.8198	101.42	113.776	117.578	123.81		1.17013	1.04316
ILMN_1691156	MT1A	1575.9	1856.31	2043.23	3745.83	4214.97	4328.4		2.48918	1.68669
ILMN_2173611	MT1E	121.631	120.648	111.382	132.265	130.386	141.084		1.12049	1.00565
ILMN_1718766	MT1F	159.101	157.523	167.396	279.777	225.756	304.5		1.67472	1.41231
ILMN_1715401	MT1G	121.405	124.349	128.301	196.999	223.102	212.957		1.77437	1.32368
ILMN_1775170	MT1X	555.186	567.134	596.058	639.853	1249.31	1352.19		2.31796	1.10121
ILMN_1686664	MT2A	2624.76	2907.48	3304.67	6317.78	6716.87	7189.76		2.51374	1.73934
ILMN_1703006	MTCH1	2216.51	2363.03	2621.34	2911.35	2932.53	2871.58		1.2674	1.20813
ILMN_1814230	MTCP1	379.857	386.043	340.847	532.253	286.465	266.459		0.721927	1.13997
ILMN_2136089	MTE	150.136	165.174	167.426	248.2	256.738	271.644		1.67575	1.31815
ILMN_1775328	MTG1	157.285	156.612	147.388	134.539	140.917	137.993		0.888542	0.898152
ILMN_1765520	MTIF2	960.756	835.582	798.39	801.762	635.268	646.297		0.713432	0.890786
ILMN_2351029	MTMR2	110.023	104.364	98.7135	106.213	99.761	98.1984		0.923376	0.955873
ILMN_1718932	MTRR	363.967	376.018	352.857	331.371	327.156	297.906		0.844695	0.92465
ILMN_2346727	MTUS1	175.093	151.396	104.454	114.944	99.01	126.476		0.690637	0.671994
ILMN_1785113	MUT	183.514	182.53	193.514	168.06	225.386	235.637		1.25947	0.987786
ILMN_1803277	MVP	333.211	341.045	298.237	349.913	429.29	506.534		1.38794	0.961281
ILMN_1756541	MXD4	364.579	451.979	622.977	425.798	574.129	472.99		1.28236	1.28439
ILMN_2350574	MYADM	537.792	440.638	483.05	449.477	580.114	691.325		1.29947	0.953085
ILMN_1738523	MYD88	127.932	144.973	138.81	120.694	164.16	155.364		1.17083	0.950897
ILMN_2198413	MYEOV	296.794	260.479	192.801	201.841	203.484	215.932		0.752623	0.708168
ILMN_1797164	MYH15	90.9915	89.7524	92.9604	96.7857	101.378	96.0184		1.09213	1.04981
ILMN_1722872	MYH9	2661.49	2246.72	2816.62	2970.63	4246.22	3124.58		1.50173	1.1791
ILMN_2326071	MYL6	8588.04	7964.1	8848.76	10506.7	14659.2	12115.4		1.61759	1.16937
ILMN_1809013	MYL6	7378.25	6519.57	7650.2	8609.05	11800.8	10583.9		1.61066	1.16991
ILMN_2364768	MYLK	115.079	104.364	106.632	107.852	98.9274	96.3265		0.889771	0.977403
ILMN_1691476	MYLK	238.844	186.062	162.807	180.125	121.193	142.163		0.619797	0.807076
ILMN_1797585	MYO1B	297.835	247.455	255.385	210.198	213.666	186.884		0.734564	0.853828
ILMN_2093027	MYO1B	1083.9	784.153	769.188	774.644	665.367	546.52		0.648743	0.826439
ILMN_2329165	MYO1C	130.983	127.732	127.579	145.156	120.288	118.84		0.924288	1.05419
ILMN_2341548	MYO5B	113.481	113.731	105.619	107.569	97.7139	99.1062		0.86624	0.938281
ILMN_1756308	NAE1	129.491	127.628	111.933	128.729	111.867	106.927		0.850943	0.935995
ILMN_1689665	NAE1	1754.34	1785.59	1747.79	1591.31	1497.83	1520.93		0.852774	0.943268
ILMN_2415439	NAE1	696.197	594.514	601.105	667.121	485.626	504.779		0.767333	0.982579
ILMN_1716547	NAGK	334.597	386.851	422.668	432.573	457.482	655.337		1.54248	1.18545
ILMN_1733523	NARG1L	163.422	175.58	149.299	153.572	132.968	146.942		0.825688	0.893418
ILMN_1718830	NARG2	177.834	194.723	159.134	175.365	158.166	160.066		0.854185	0.897849
ILMN_1797332	NARS2	256.029	271.301	239.829	275.049	198.408	224.531		0.802038	0.976385
ILMN_2348975	NASP	215.963	245.132	248.743	198.657	165.108	156.307		0.697069	0.9703
ILMN_2358041	NBN	123.905	128.998	124.521	124.162	111.285	113.231		0.887754	0.98331
ILMN_1751444	NCAPG	550.154	508.426	451.772	458.794	392.2	311.754		0.664998	0.860177
ILMN_2359500	NCDN	103.708	103.733	108.798	111.722	114.579	113.24		1.09823	1.06305
ILMN_1687316	NCDN	102.07	103.27	104.207	104.795	107.648	107.705		1.04876	1.01783
ILMN_2121437	NCL	3358.41	3029.54	2718.6	2907.81	2547.76	2334.66		0.764318	0.880785
ILMN_3220934	NCRNA00152	199.013	171.209	164.279	153.768	145.479	152.129		0.803864	0.859072
ILMN_1664511	NDC80	195.004	175.773	172.725	155.86	142.515	139.06		0.759419	0.886207
ILMN_2397199	NDEL1	128.032	128.883	132.335	128.638	143.201	149.308		1.13854	1.0158
ILMN_2387731	NDUFV3	114.695	112.856	116.784	114.855	121.677	131.359		1.112	1.01797
ILMN_1749011	NECAP2	286.864	281.054	279.552	333.57	392.842	411.362		1.41606	1.0796
ILMN_1703140	NEDD4	363.894	450.618	538.849	483.406	586.244	561.822		1.40951	1.25505
ILMN_1757697	NEIL3	254.679	215.74	172.373	181.299	170.095	162.908		0.707887	0.751824
ILMN_1653822	NEK2	172.091	189.205	160.458	157.084	160.593	130.784		0.806476	0.878895
ILMN_1758311	NET1	756.816	781.232	759.811	906.904	879.33	959.77		1.19574	1.08366
ILMN_2267535	NET1	112.377	119.762	120.209	121.552	125.233	150.235		1.18665	1.04145
ILMN_1763144	NEU1	140.041	159.614	163.67	145.044	207.653	230.765		1.46308	1.03024
ILMN_1739450	NFE2L1	233.044	230.94	249.194	199.809	281.12	295.819		1.24345	0.967715
ILMN_1790909	NFE2L2	714.905	688.126	569.641	616.685	542.348	600.894		0.814838	0.845545
ILMN_2049766	NFE2L3	488.774	568.403	539.989	375.329	364.68	423.711		0.745752	0.865814
ILMN_1707312	NFIL3	227.836	192.483	174.731	145.882	173.06	176.905		0.832619	0.762785
ILMN_2324998	NGDN	957.207	843.265	807.938	748.129	722.281	777.785		0.833152	0.864255
ILMN_1728779	NGLY1	296.851	320.57	268.5	259.179	273.278	250.591		0.84848	0.854651
ILMN_3231390	NHP2	2658.05	2164.49	2235.72	2364.21	1968.34	1539.8		0.727448	0.953841
ILMN_1718672	NHP2	1015.94	981.565	1086.09	995.572	824.755	636.96		0.731772	1.04213
ILMN_3226807	NHP2	725.92	628.161	624.588	618.538	551.866	411.503		0.711456	0.918059
ILMN_2365544	NHP2	1181.91	1052.74	1066.4	1057.89	911.46	667.124		0.706412	0.950612
ILMN_1807211	NICN1	257.076	259.926	247.224	321.609	211.105	202.113		0.799259	1.10025
ILMN_1777066	NIF3L1	1024.1	1138.25	874.092	802.753	796.353	957.743		0.811199	0.775473
ILMN_1800058	NKX2-5	122.906	121.31	126.664	127.258	165.394	144.914		1.27063	1.03974
ILMN_1669456	NME3	334.247	335.837	309.944	373.075	265.161	282.243		0.816918	1.0193
ILMN_1806634	NNT	200.481	198.23	234.969	234.318	233.065	279.88		1.28651	1.17701
ILMN_2336647	NNT	162.78	152.616	193.058	193.438	187.061	201.633		1.2324	1.22543
ILMN_2187727	NOC3L	671.523	774.933	700.868	628.751	511.208	617.357		0.780228	0.919225
ILMN_2151368	NOL12	173.243	196.073	160.561	174.918	157.291	152.232		0.838097	0.908381
ILMN_1761181	NOL9	112.319	118.578	106.977	112.748	102.443	101.592		0.883662	0.951614
ILMN_1787628	NOP56	4925.63	4283.86	4107.94	5436.76	3584.7	2882.66		0.70225	1.0364
ILMN_1705407	NOP56	1235.95	1099.29	1113.39	1273.18	962.842	691.109		0.708255	1.02197
ILMN_1716678	NPC2	5687.66	5833.46	8051.18	7666.99	8599.42	7137.02		1.36588	1.36429
ILMN_1730539	NPHP3	136.566	141.072	141.619	127.877	132.088	124.611		0.924581	0.970672
ILMN_2110252	NPM3	926.841	897.688	889.777	665.188	724.33	747.889		0.806904	0.852256
ILMN_1800160	NR0B1	560.355	490.56	405.312	349.683	314.498	307.738		0.59209	0.718417
ILMN_2326675	NR2C1	198.097	208.269	188.875	175.371	165.391	166.213		0.816024	0.896352
ILMN_2135798	NR2C2AP	251.202	232.89	207.606	164.187	190.256	178.498		0.761744	0.76802
ILMN_1800897	NRD1	746.133	755.22	835.565	882.75	914.381	874.12		1.19126	1.14451
ILMN_1759563	NRIP3	158.912	165.347	186.899	214.46	210.958	214.975		1.31356	1.23777
ILMN_1770911	NRSN2	187.064	196.119	196.743	233.633	217.392	227.118		1.16004	1.12316
ILMN_1692163	NSDHL	610.198	708.576	708.035	749.781	770.091	843.295		1.2234	1.10543
ILMN_2330845	NSF	199.377	186.832	204.162	213.15	227.928	230.616		1.18729	1.08053
ILMN_2276820	NSL1	117.01	110.06	108.096	113.328	98.2888	96.7035		0.85873	0.975133
ILMN_1679134	NSMCE4A	1524.96	1483.05	1434.64	1397.86	1231.93	1224.5		0.816629	0.941652
ILMN_2058347	NT5DC1	128.694	117.403	112.734	112.479	99.9499	112.775		0.864396	0.915142
ILMN_1680673	NT5DC1	261.954	249.361	221.25	231.662	201.889	198.472		0.783002	0.885781
ILMN_1697220	NT5E	254.906	490.214	520.725	576.182	754.915	584.339		1.79737	1.47212
ILMN_2227968	NTHL1	360.05	368.988	324.839	282.804	249.06	260.865		0.699449	0.833486
ILMN_1751589	NUDCD2	550.582	487.956	423.236	514.36	409.536	375.133		0.755552	0.902805
ILMN_2048822	NUDCD2	308.8	267.228	270.102	306.499	240.272	219.963		0.798981	1.00099
ILMN_1796900	NUDCD3	161.786	141.207	169.871	143.404	192.122	194.806		1.27702	1.03393
ILMN_2366972	NUDT6	201.56	186.933	186.922	197.808	151.869	171.057		0.831228	0.990313
ILMN_1694311	NUDT6	159.873	136.73	136.478	142.172	119.184	127.931		0.833149	0.939471
ILMN_1665192	NUDT6	163.409	151.026	153.947	156.452	129.574	135.816		0.844023	0.987165
ILMN_1658695	NUF2	249.125	244.854	221.354	239.509	211.691	181.972		0.796922	0.932961
ILMN_1813800	NUFIP1	111.394	105.029	101.643	110.458	96.8809	102.922		0.923205	0.980024
ILMN_1815924	NUP107	1068.45	1049.17	925.711	849.605	940.302	867.223		0.853563	0.838353
ILMN_1761772	NUP155	99.2519	100.212	90.3206	92.7474	92.4382	87.3726		0.901468	0.917798
ILMN_1815723	NUP35	394.608	440.982	366.261	350.941	303.223	352.59		0.78485	0.858318
ILMN_1701374	NUP35	326.059	343.583	323.507	282.282	270.901	267.841		0.804523	0.904646
ILMN_1771903	NUP37	1820.73	1841.03	1489.75	1385.16	1506.11	1555.38		0.83607	0.785116
ILMN_1725612	NUP50	223.566	216.348	201.769	214.109	201.397	167.681		0.83898	0.945364
ILMN_1734826	NUP88	1029.27	1064.06	850.723	975.329	880.14	664.699		0.737982	0.87232
ILMN_1726720	NUSAP1	1037.02	912.813	834.695	872.635	795.949	596.208		0.713989	0.875631
ILMN_2409298	NUSAP1	468.197	424.889	378.61	355.849	351.783	307.032		0.737684	0.822382
ILMN_1655046	NUTF2	412.366	388.492	471.617	375.334	460.647	483.525		1.17895	1.05755
ILMN_2068747	OAT	548.055	568.168	557.405	610.367	658.268	829.985		1.33329	1.04618
ILMN_1785852	OBFC2A	346.828	326.238	371.779	465.726	494.318	424.463		1.36507	1.24431
ILMN_1772286	OCIAD2	1040.21	1070.06	1370.35	1363.13	1447.7	1680.33		1.48229	1.29532
ILMN_1700306	OCIAD2	1622.39	1560.37	1778.72	1910.63	2094.82	2346.65		1.39548	1.15917
ILMN_1759277	OIP5	211.81	213.841	187.11	231.823	183.28	150.182		0.783418	0.984219
ILMN_1795963	OKL38	1065.56	893.379	678.578	756.442	597.959	698.546		0.66184	0.732549
ILMN_1742025	OLFM1	277.059	351.076	265.462	229.147	216.987	230.238		0.711988	0.787425
ILMN_1761425	OLFML2A	263.905	224.903	211.342	187.09	186.3	179.992		0.749357	0.815107
ILMN_1670079	OMA1	190.468	178.807	154.067	138.994	142.295	161.969		0.823948	0.793612
ILMN_2381899	OPTN	226.821	211.571	285.143	256.76	286.797	404.033		1.57583	1.23612
ILMN_2061452	ORC2L	310.298	282.027	261.799	289.687	258.772	224.271		0.815503	0.931054
ILMN_1662174	ORMDL3	134.457	127.096	127.656	138.246	151.99	171.741		1.23773	1.01663
ILMN_1719835	OSCP1	97.0634	100.758	101.15	103.177	105.268	110.787		1.09217	1.03288
ILMN_1658909	OSGEPL1	115.233	111.051	111.284	108.403	99.6114	104.599		0.902451	0.970847
ILMN_2047676	OSGEPL1	136.877	139.669	136.057	128.597	107.267	121.454		0.827066	0.956997
ILMN_2319588	OSGIN1	144.984	130.584	109.947	117.918	111.55	113.685		0.817346	0.82689
ILMN_1776005	OSTC	1397.6	1379.63	1424.25	1054.27	1634.17	1548.69		1.14606	0.892447
ILMN_3236156	OSTC	1732.22	1891.86	1873.29	1578.8	2164.17	2140.53		1.18781	0.952543
ILMN_3246544	OSTCL	110.518	111.737	116.029	116.817	123.802	123.688		1.11354	1.04765
ILMN_1708203	OTUD4	178.256	174.829	191.584	146.563	163.366	150.62		0.889265	0.957692
ILMN_1811489	OXSR1	443.617	404.436	453.016	434.834	518.517	518.088		1.22233	1.04693
ILMN_2381697	P4HA2	268.446	226.691	286.935	369.332	320.807	373.483		1.40222	1.32542
ILMN_1795778	P4HA2	417.657	326.741	435.024	578.516	502.655	702.812		1.61938	1.36156
ILMN_2280135	P4HA2	92.4546	94.0124	97.1831	96.9418	100.005	99.7404		1.07121	1.04107
ILMN_1719303	P4HB	1034.05	1156.2	1089.72	1356.05	1504.03	1745.03		1.48342	1.11666
ILMN_3300313	P4HTM	227.25	209.075	202.655	214.145	182.74	172.153		0.813368	0.955251
ILMN_1728984	PA2G4	1124.44	1013.79	874.025	919.231	902.833	831.748		0.811225	0.838666
ILMN_3241262	PABPC4L	99.5116	100.348	112.858	114.471	112.869	108.463		1.10743	1.13744
ILMN_1773760	PAICS	2008.11	1915.52	1664	1573.22	1446.13	1277.66		0.694199	0.825055
ILMN_2286106	PAICS	113.964	104.5	100.944	107.6	96.7131	95.1072		0.87804	0.954591
ILMN_2392546	PAICS	1866.4	2002.11	1804.91	1542.62	1512.46	1405.14		0.754193	0.865331
ILMN_1776398	PAIP1	104.124	104.298	102.473	97.7559	97.5638	98.9408		0.942818	0.960689
ILMN_2054145	PAK1IP1	412.637	403.125	409.849	353.825	336.507	254.821		0.724878	0.936148
ILMN_1726064	PAK1IP1	716.554	673.689	623.812	485.508	484.071	479.638		0.693194	0.797933
ILMN_1698732	PALLD	1140.07	936.388	1285.94	1315.93	1608.4	1365.65		1.43227	1.25303
ILMN_2313901	PAM	368.307	447.944	482.796	361.21	523.776	580.317		1.35264	1.034
ILMN_1710495	PAPLN	168.035	158.894	119.802	104.881	97.5375	109.827		0.63428	0.687254
ILMN_1798354	PAPOLA	1245.8	1139.15	1061.89	1180.9	879.13	963.927		0.772786	0.940396
ILMN_1745154	PARD6B	116.207	113.864	104.201	100.203	102.046	107.481		0.910709	0.888441
ILMN_1718558	PARP12	154.763	156.529	142.251	114.367	138.736	141.069		0.89885	0.824366
ILMN_2354237	PARP2	162.83	161.034	154.324	139.358	142.361	137.311		0.863548	0.906808
ILMN_1756408	PARVA	133.23	130.011	146.526	169.047	153.953	149.434		1.15251	1.1988
ILMN_3307892	PARVA	257.394	256.574	305.701	329.595	386.717	294.509		1.32543	1.23606
ILMN_1667022	PASK	115.08	111.862	108.373	107.227	103.129	102.622		0.906627	0.950024
ILMN_1673673	PBK	1075.74	1030.77	776.212	726.612	833.708	606.26		0.683579	0.713417
ILMN_1789653	PBLD	98.4799	98.6795	106.993	103.601	111.685	109.221		1.12044	1.06814
ILMN_1795906	PCBD1	791.941	684.791	610.796	712.868	586.648	562.151		0.777933	0.896347
ILMN_1728498	PCBP4	116.196	117.995	128.347	130.345	136.911	133.863		1.15621	1.10462
ILMN_1761010	PCCB	956.116	788.467	793.255	721.707	556.39	613.46		0.670562	0.868381
ILMN_2227757	PCDHB2	258.996	280.411	323.572	332.117	423.076	337.882		1.41073	1.21557
ILMN_1798602	PCF11	179.002	192.437	190.418	169.39	172.127	156.455		0.884616	0.968684
ILMN_1788059	PCGF5	115.033	113.333	109.595	114.937	105.641	104.86		0.921767	0.98321
ILMN_2042595	PCM1	574.345	519.232	545.041	487.331	444.257	459.98		0.826861	0.944032
ILMN_1706958	PCNA	176.689	175.818	143.692	156.142	142.377	143.858		0.812	0.850576
ILMN_1740010	PCNX	253.322	257.381	286.941	257.362	375.265	308.164		1.33821	1.06579
ILMN_1755582	PCSK1N	117.055	136.703	141.584	121.302	152.487	156.641		1.2182	1.03597
ILMN_2131381	PDE3B	111.688	111.535	111.095	105.751	102.843	100.393		0.910461	0.971431
ILMN_2075436	PDIA3P	275.791	283.49	352.098	300.508	388.42	332.85		1.28964	1.16686
ILMN_2075440	PDIA3P	595.542	670.354	794.791	695.577	858.399	857.303		1.35533	1.17732
ILMN_1695763	PDIA5	202.411	196.959	231.03	225.381	257.475	221.29		1.1988	1.14283
ILMN_2412281	PDLIM5	113.109	115.341	112.53	106.292	151.53	135.5		1.25643	0.957855
ILMN_2361478	PDLIM5	124.752	126.071	111.112	113.165	162.202	142.386		1.21436	0.894164
ILMN_1690125	PDLIM7	265.737	305.036	313.126	440.076	517.199	347.313		1.51463	1.31962
ILMN_1731720	PDRG1	281.444	279.068	287.769	321.554	329.758	330.006		1.17707	1.08708
ILMN_1746696	PDS5B	124.566	119.085	125.112	123.054	112.129	107.4		0.901	1.01853
ILMN_1703324	PDSS1	288.563	282.999	250.312	257.43	220.193	238.386		0.802325	0.888342
ILMN_2080611	PDSS1	407.079	449.732	370.505	372.749	326.122	334.121		0.770582	0.867466
ILMN_1771376	PEA15	1081.74	1135.71	1040.17	1793.31	1588.98	1973.6		1.60661	1.27781
ILMN_1755862	PFAS	760.072	757.861	749.865	709.049	616.63	590.543		0.795274	0.961119
ILMN_1653292	PFKFB4	239.471	265.835	316.375	576.006	385.531	313.18		1.38275	1.76602
ILMN_2058795	PGCP	96.3936	97.8232	108.85	110.504	114.094	104.412		1.12506	1.12943
ILMN_1794165	PGD	3446.54	3413.48	2292.94	2698.64	2460.64	2999.59		0.795951	0.727633
ILMN_1716265	PGM2L1	151.962	119.715	193.187	151.664	224.933	160.708		1.41948	1.26934
ILMN_2057566	PGP	123.948	120.446	116.351	117.024	113.098	111.251		0.917979	0.954915
ILMN_1808047	PHC2	150.63	165.622	168.889	134.529	184.83	182.475		1.16143	0.95942
ILMN_1794473	PHF17	111.622	104.78	109.929	112.334	99.3697	98.362		0.913725	1.02708
ILMN_1732985	PHF20L1	276.501	307.808	304.33	267.185	356.695	347.426		1.20505	0.978104
ILMN_2057826	PHF3	143.91	147.162	141.583	136.482	134.231	132.009		0.914686	0.95531
ILMN_2282352	PHYH	235.152	231.272	241.213	258.724	285.932	341.986		1.34624	1.07185
ILMN_2385566	PHYH	108.051	112.696	110.313	110.58	121.066	129.979		1.13725	1.00066
ILMN_1808938	PIGF	398.413	380.886	369.864	287.072	312.104	337.453		0.833515	0.842985
ILMN_1653613	PIGO	162.81	150.427	141.744	141.537	134.085	139.184		0.872405	0.904369
ILMN_1743397	PIGW	300.546	278.814	271.347	295.566	237.185	242.397		0.827778	0.978515
ILMN_3251440	PIK3C2A	209.716	203.859	210.542	206.344	160.829	170.131		0.800242	1.00801
ILMN_1666924	PINK1	201.018	169.911	223.822	212.614	266.119	211.223		1.28688	1.1766
ILMN_1676763	PIPSL	436.405	394.33	403.718	361.212	348.299	316.372		0.800099	0.920786
ILMN_2383383	PIR	646.763	496.49	455.081	423.485	308.757	388.798		0.610149	0.768479
ILMN_1761247	PIR	1140.57	815.084	735.543	825.445	536.074	609.6		0.585826	0.798191
ILMN_1653220	PITPNM1	224.182	243.53	276.397	346.106	366.952	305.362		1.43745	1.33095
ILMN_1674386	PITX1	764.131	798.069	866.196	823.046	1027.29	896.479		1.23145	1.08132
ILMN_3234837	PKDCC	128.483	123.206	111.743	115.58	105.469	108.665		0.850787	0.903186
ILMN_2337974	PKIA	88.1382	92.4641	96.3625	95.4246	101.626	99.1179		1.11152	1.06193
ILMN_1738742	PLAT	105.886	104.646	111.266	118.295	120.766	128.643		1.18466	1.09038
ILMN_1656057	PLAU	1189.98	1109.1	1377.97	985.865	1961.48	1932.33		1.69364	1.02817
ILMN_1691508	PLAUR	154.365	167.071	158.497	241.655	254.697	196.001		1.40214	1.24489
ILMN_2408543	PLAUR	127.981	146.065	144.816	199.595	251.126	198.4		1.64033	1.25676
ILMN_2374340	PLAUR	182.555	202.555	225.838	304.962	435.275	349.185		2.03698	1.37831
ILMN_1737025	PLCL2	165.311	153.823	181.785	173.526	195.017	175.859		1.16213	1.11336
ILMN_1666976	PLD3	706.265	785.818	941.641	1077.1	1002.59	1201.25		1.47703	1.35297
ILMN_1684391	PLOD1	812.003	983.512	950.486	727.333	1299.23	1191.43		1.38716	0.934449
ILMN_2074044	PLS1	284.666	262.334	190.778	200.127	186.383	194.908		0.697059	0.714635
ILMN_1759206	PLS1	177.23	155.311	125.257	135.817	133.177	134.499		0.804941	0.785088
ILMN_1703433	PLSCR3	886.074	1173.13	1550.13	1555.25	1496.18	2010.71		1.70304	1.50805
ILMN_1719972	PLXNA3	91.7603	95.9119	98.9735	98.2664	107.481	108.977		1.15338	1.05098
ILMN_2098446	PMAIP1	243.562	260.355	295.619	292.351	384.45	306.945		1.37204	1.1668
ILMN_1734276	PMEPA1	1660.99	1528.74	3025.64	2501.58	2715.3	2078.6		1.50292	1.73282
ILMN_1675858	PMEPA1	98.2708	98.3904	115.2	110.445	113.555	106.014		1.11649	1.14738
ILMN_2309156	PMEPA1	843.243	809.057	1692.48	1260.22	1337.23	1171.93		1.51859	1.78702
ILMN_1756445	PMF1	164.545	166.951	157.656	149.89	146.785	153.303		0.905254	0.927753
ILMN_1700847	PMS1	129.853	124.232	119.339	133.736	114.651	109.547		0.882376	0.996027
ILMN_1721703	PNN	534.304	531.517	462.848	585.637	394.192	421.061		0.764905	0.983734
ILMN_1810608	PNPT1	194.738	211.947	193.633	174.292	161.356	181.834		0.843871	0.904692
ILMN_2191436	POLA1	297.644	298.733	268.176	231.554	257.927	221.91		0.804586	0.837944
ILMN_1751773	POLD3	166.002	153.591	159.968	153.157	139.801	141.758		0.880994	0.979763
ILMN_1774336	POLE2	392.03	429.269	358.326	286.516	300.461	298.134		0.72884	0.785149
ILMN_1671004	POLG2	212.004	234.041	187.959	210.51	178.189	183.708		0.811347	0.893341
ILMN_1740291	POLQ	305.95	330.769	289.139	239.614	258.444	211.482		0.738043	0.830434
ILMN_1678934	POLR1E	291.844	277.971	248.785	266.338	228.621	248.517		0.837355	0.904017
ILMN_1801664	POLR3K	376.558	334.001	302.812	327.827	290.429	278.215		0.800278	0.887526
ILMN_1756793	POLS	272.589	282.843	256.155	265.456	236.535	207.841		0.800055	0.939109
ILMN_1721729	PPARBP	470.365	446.093	531.508	379.254	410.219	336.568		0.814862	0.993786
ILMN_2382126	PPFIA1	168.436	169.536	163.534	158.473	152.218	152.062		0.90031	0.952761
ILMN_1679460	PPFIBP1	167.906	184.625	201.738	201.976	217.807	224.952		1.25594	1.14519
ILMN_1675656	PPFIBP2	440.479	445.618	227.502	172.86	192.392	234.142		0.481364	0.451827
ILMN_3236259	PPIAL4A	12630	12333.5	11891.2	11416.6	11016.2	11749.3		0.911952	0.933678
ILMN_2190851	PPID	143.336	131.877	157.93	140.706	193.912	168.675		1.31748	1.08511
ILMN_1715616	PPIL5	750.478	806.166	655.113	636.937	596.495	533.172		0.725706	0.830022
ILMN_1778890	PPIL5	236.628	233.666	203.819	218.136	201.014	192.138		0.835972	0.897215
ILMN_1716862	PPM1B	743.605	673.415	608.062	471.907	534.542	438.562		0.686726	0.762141
ILMN_1713846	PPM1H	265.013	218.565	220.526	188.755	173.73	203.384		0.779841	0.84636
ILMN_1736670	PPP1R3C	345.008	338.11	538.236	389.703	559.416	457.981		1.48934	1.35839
ILMN_2196097	PPP2CA	1051.54	1148.26	897.238	832.557	862.882	954.21		0.826027	0.786343
ILMN_1788961	PPP2R2A	538.754	472.608	596.539	539.072	712.753	627.593		1.32529	1.12285
ILMN_1775965	PPP4R4	123.061	130.982	105.805	116.059	107.458	107.82		0.847404	0.873333
ILMN_2306033	PRAME	204.092	211.915	212.551	184.524	236.84	252.528		1.17635	0.954492
ILMN_1815024	PRDX5	950.431	857.619	1078.5	1185.88	1073.89	1476.86		1.41077	1.25239
ILMN_1751887	PREP	207.383	223.979	239.028	210.181	269.719	238.722		1.17869	1.04137
ILMN_2210129	PRIM1	578.271	628.689	499.987	516.471	432.245	377.988		0.671301	0.842164
ILMN_1694502	PRIM1	488.336	494.24	423.198	432.571	361.549	321.922		0.69559	0.870945
ILMN_1783889	PRKAA1	168.721	170.456	173.882	180.603	148.32	153.311		0.889303	1.04513
ILMN_1786021	PRKAB2	112.962	122.369	142.96	130.571	150.015	135.412		1.21288	1.16233
ILMN_1674390	PRKAR1B	142.102	135.46	131.241	152.509	153.547	153.503		1.10624	1.02229
ILMN_1733421	PRKCQ	139.975	143.44	148.041	124.252	130.448	128.606		0.914046	0.960758
ILMN_1662964	PRMT3	888.489	1100.73	936.567	781.475	764.818	744.245		0.758623	0.863679
ILMN_1811955	PRMT5	464.184	466.312	464.987	377.703	409.049	407.618		0.877668	0.905635
ILMN_1671928	PROS1	210.495	261.649	327.319	271.357	296.878	354.179		1.37894	1.26799
ILMN_2399431	PRPS2	539.002	591.502	574.194	437.486	485.153	430.288		0.809763	0.894892
ILMN_1782403	PRR11	261.871	269.858	262.128	210.564	231.272	187.825		0.788177	0.888972
ILMN_2344204	PRR13	7111.69	6973.54	6354.5	6088.15	6311.76	5377.01		0.829861	0.883383
ILMN_1753665	PRR4	103.569	105.148	109.627	102.142	110.281	113.274		1.07109	1.01462
ILMN_1685699	PRSS3	145.848	157.68	185.076	171.969	218.339	199.233		1.37573	1.17632
ILMN_2355559	PSAP	4067.27	4817.52	5148.17	3998.64	5733.28	6122.66		1.33441	1.02949
ILMN_1749109	PSAP	4167.34	4554.07	5122.78	3858.38	5295.58	5800.51		1.27228	1.02978
ILMN_1717477	PSD3	150.545	140.065	160.791	174.306	180.74	202.312		1.3181	1.15308
ILMN_1796669	PSEN1	128.486	131.599	136.327	136.447	136.934	143.314		1.07752	1.04878
ILMN_1788701	PSIP1	312.33	368.636	301.581	292.573	255.331	271.168		0.773164	0.872517
ILMN_2058512	PSMA2	334.328	361.623	325.763	369.413	280.267	264.008		0.782061	0.998888
ILMN_2198376	PSMA4	4159.66	4032.74	3712.06	4095.73	3282.08	3175.07		0.788187	0.953053
ILMN_1682098	PSMA4	1655.96	1412.69	1387.33	1598.3	1261.86	1156.71		0.788152	0.972946
ILMN_3307266	PSMC3IP	171.297	180.357	167.67	152.286	159.206	149.025		0.876518	0.909859
ILMN_2396947	PSMC3IP	174.786	168.411	154.819	145.659	140.112	148.324		0.840437	0.875524
ILMN_2396948	PSMC3IP	156.057	150.362	135.969	121.917	120.018	128.076		0.809654	0.841609
ILMN_1780189	PSMC5	2843.57	2762.22	2846	2912.05	2415.31	2367.38		0.853171	1.02716
ILMN_2346573	PSME3	524.929	543.51	480.339	550.216	428.848	293.663		0.67623	0.964542
ILMN_1800975	PSME3	422.862	455.572	393.336	429.106	354.431	268.139		0.708728	0.93626
ILMN_1659285	PSMG1	1005.75	943.337	871.155	924.699	742.493	778.361		0.78029	0.921382
ILMN_1779264	PSMG1	878.798	724.085	772.528	734.985	622.753	632.44		0.783085	0.940501
ILMN_2088410	PSMG2	980.972	882.775	848.731	771.084	757.93	797.606		0.834628	0.869117
ILMN_3224204	PSMG4	345.741	301.665	290.668	310.706	256.801	283.164		0.834044	0.928899
ILMN_1671843	PSRC1	244.4	247.977	210.513	225.987	208.721	192.109		0.814073	0.886514
ILMN_2345016	PTGES2	427.323	437.93	390.35	340.997	322.604	324.068		0.747379	0.84524
ILMN_1785699	PTHLH	124.586	128.777	150.311	164.227	175.678	230.817		1.6044	1.24145
ILMN_2314169	PTHLH	242.421	236.7	292.608	301.596	343.664	487.985		1.73578	1.2402
ILMN_1690806	PTPLB	911.771	833.174	602.532	746.947	674.19	616.441		0.73964	0.773364
ILMN_2170353	PTPLB	1650.14	1438.34	1033.85	1362.22	1184.36	1033.38		0.718067	0.775808
ILMN_1810962	PTPRK	229.785	202.004	295.639	240.371	395.971	360.028		1.75085	1.24137
ILMN_1669172	PTPRR	95.1451	95.2822	95.4097	94.4145	100.856	99.0659		1.04986	0.996833
ILMN_1747184	PUS7L	127.84	132.726	134.004	137.441	146.962	138.739		1.09647	1.04175
ILMN_1732926	PVT1	128.828	132.264	127.214	139.924	141.907	140.765		1.08265	1.02315
ILMN_1684440	PXN	167.408	161.804	169.643	178.831	226.688	205.249		1.31203	1.05851
ILMN_1773485	QKI	151.19	138.822	136.28	124.536	133.901	121.056		0.879128	0.899331
ILMN_1754547	R3HDM1	181.471	179.072	174.532	175.045	164.468	162.113		0.905802	0.969587
ILMN_1692219	RAB11FIP1	836.86	545.078	491.06	343.287	407.257	364.596		0.55853	0.603752
ILMN_1670666	RAB12	128.995	129.405	118.15	122.803	116.275	108.369		0.869365	0.932482
ILMN_1667417	RAB23	176.512	172.465	186.99	223.933	213.717	202.428		1.19247	1.17751
ILMN_1790317	RAB26	132.833	121.886	106.675	115.711	91.972	97.9037		0.745432	0.873068
ILMN_1739876	RAB3GAP1	557.921	608.786	673.889	684.335	660.25	685.784		1.1537	1.16415
ILMN_1803197	RAB3IP	368.729	347.248	301.242	330.125	291.501	287.078		0.808098	0.881826
ILMN_1752582	RAB5B	703.346	672.61	760.655	680.426	894.815	851.598		1.26924	1.04733
ILMN_2207363	RABAC1	428.471	571.683	757.641	645.214	687.937	1080.38		1.76804	1.40264
ILMN_1722127	RAD54B	172.859	165.704	155.356	143.907	146.691	147.556		0.869107	0.88392
ILMN_1658027	RAD54L	164.232	155.856	147.872	145.375	146.529	128.447		0.859064	0.916143
ILMN_1682139	RAI14	1252.26	1134.61	755.358	1611.25	1792.76	1721.26		1.47223	0.99151
ILMN_1733115	RALGAPB	146.871	147.744	152.383	151.126	174.474	167.473		1.16066	1.03019
ILMN_1699856	RALGDS	633.95	671.288	753.248	592.834	784.011	839.102		1.24354	1.03129
ILMN_2109156	RANBP1	3184.27	2987.24	2850.91	3020.54	2535.07	2323.17		0.787204	0.951379
ILMN_1776519	RAP1GAP	527.615	482.824	313.687	327.363	309.704	254.639		0.558513	0.634427
ILMN_1806266	RAP1GDS1	261.591	290.506	315.945	276.659	360.26	319.184		1.23066	1.07337
ILMN_1783846	RAPH1	128.353	126.803	131.6	127.768	135.138	143.825		1.0933	1.0165
ILMN_1716176	RARA	118.316	108.391	98.0177	105.251	98.872	100.905		0.881214	0.896615
ILMN_1727045	RASGRP3	97.1124	93.0397	100.66	100.525	111.654	108.13		1.15583	1.05802
ILMN_3251085	RBBP4	272.133	249.025	234.153	242.054	175.953	188.031		0.698413	0.913747
ILMN_1770053	RBBP7	1055.05	991.451	924.507	1138.23	890.067	732.574		0.792885	1.00793
ILMN_2363621	RBBP8	474.635	478.281	413.161	439.553	416.98	310.884		0.763828	0.894848
ILMN_1765417	RBBP9	136.69	136.699	136.717	151.739	125.832	119.19		0.896241	1.05511
ILMN_1786050	RBBP9	275.382	292.211	322.941	347.45	216.423	206.597		0.745289	1.18111
ILMN_1782745	RBL1	166.793	174.145	155.595	152.146	147.69	129.909		0.814223	0.902631
ILMN_1797698	RBM12	214.689	213.758	211.52	202.77	166.995	185.644		0.823061	0.966957
ILMN_1781906	RBM17	345.141	347.536	298.611	337.626	278.81	253.607		0.768635	0.918517
ILMN_1768117	RBM25	796.072	918.146	820.327	749.146	680.048	644.014		0.7724	0.915562
ILMN_1664009	RBM46	84.178	87.1722	88.1134	90.948	95.4564	92.8378		1.09889	1.045
ILMN_3306730	RBM47	588.993	482.243	427.926	423.207	364.095	391.095		0.704971	0.794533
ILMN_3224926	RBM47	708.131	529.065	479.825	497.836	364.867	373.966		0.597183	0.790224
ILMN_1808238	RBPMS2	438.131	541.996	605.447	588.76	662.908	684.073		1.37429	1.21842
ILMN_2409318	RCCD1	143.31	139.327	137.749	133.243	106.804	109.207		0.764271	0.9588
ILMN_1662129	RCN2	1403.99	1765.96	1240.57	1627.39	1239.08	1188.85		0.76592	0.904734
ILMN_2309534	RDM1	118.943	110.35	101.304	109.696	104.571	97.2259		0.880083	0.920222
ILMN_2067269	RECK	109.667	141.902	142.024	220.003	178.255	151.584		1.31113	1.43908
ILMN_1811258	RELB	140.855	131.065	149.584	129.928	106.96	113.514		0.810806	1.02792
ILMN_1702633	RETSAT	171.595	167.133	185.41	171.555	204.587	195.733		1.18183	1.05384
ILMN_1655733	RFC2	278.571	239.681	254.553	276.279	206.121	217.562		0.817523	1.02427
ILMN_1658143	RFC3	294.926	300.251	256.069	243.418	246.124	230.141		0.800207	0.839224
ILMN_1724489	RFC4	741.489	745.456	634.346	614.395	557.159	563.24		0.753491	0.839804
ILMN_2370365	RFC4	729.923	684.02	606.223	600.304	464.414	538.424		0.709249	0.853307
ILMN_1659364	RFC5	830.315	936.5	786.458	743.931	700.219	663.085		0.771617	0.866185
ILMN_1802162	RFESD	113.99	112.587	112.477	111.286	102.034	106.081		0.918516	0.987581
ILMN_1800787	RFTN1	369.802	382.219	585.498	566.307	491.268	477.749		1.28855	1.53161
ILMN_1741200	RFX5	491.38	489.483	517.723	529.567	436.346	404.379		0.857128	1.06772
ILMN_1776213	RGMB	107.506	110.987	121.693	140.146	137.667	133.7		1.24199	1.19839
ILMN_3238854	RGPD8	147.347	143.485	142.192	135.94	131.498	131.128		0.903015	0.95633
ILMN_1724349	RGS3	102.002	105.274	107.503	106.279	123.674	115.59		1.15432	1.03138
ILMN_1809437	RHBDD2	336.601	394.291	401.302	497.903	541.391	427.924		1.32621	1.23028
ILMN_2313730	RHOC	2342.11	1831.31	1777.76	2591.18	2692.35	3005.29		1.36522	1.04685
ILMN_1673305	RHOC	1326.01	1144.96	1166.93	1584.56	1531.8	1694.59		1.30572	1.11353
ILMN_2338480	RHOT1	289.958	294.239	290.875	276.738	269.511	260.79		0.907745	0.971613
ILMN_1753143	RHPN2	2472.57	1957.1	1779.57	1482.05	1592.57	822.29		0.545155	0.736311
ILMN_2149053	RIF1	304.807	291.887	318.037	250.685	272.47	276.207		0.919528	0.953123
ILMN_1755758	RIF1	124.055	126.944	120.468	118.684	109.721	115.342		0.896666	0.952798
ILMN_3245707	RIMKLB	192.247	187.463	190.837	144.981	148.716	144.09		0.77113	0.884404
ILMN_1769546	RIN2	474.732	518.874	610.722	625.525	605.873	659.346		1.27336	1.2442
ILMN_2151488	RMI1	376.993	448.112	422.159	370.731	343.657	320.633		0.805097	0.960956
ILMN_1810901	RNASEH2A	254.93	220.39	206.674	217.214	198.262	172.509		0.780047	0.891797
ILMN_1782488	RNASEH2B	327.265	289.416	286.585	362.756	253.054	231.788		0.786212	1.05296
ILMN_3299905	RNFT2	143.142	142.588	128.947	128.803	116.661	113.714		0.80627	0.90208
ILMN_3308335	RNU6-1	960.158	1061.79	1236.1	1382.59	1174.22	1441		1.29341	1.29514
ILMN_3310351	RNU6-15	965.247	1063.19	1188.52	1484.64	1236.62	1426.97		1.31313	1.31784
ILMN_1696466	ROPN1L	130.723	115.09	114.912	114.441	107.475	106.672		0.871181	0.933037
ILMN_2047112	RP11-529I10.4	196.471	183.631	227.094	220.774	215.989	245.123		1.21313	1.17828
ILMN_1770339	RPAIN	642.4	599.003	571.177	551.552	513.51	535.91		0.84535	0.904404
ILMN_2116366	RPL12	7301.57	7788.78	7548.77	7524.05	5810.87	6707.39		0.829555	0.998839
ILMN_1737517	RPL29	543.313	453.887	387.163	392.264	352.204	355.557		0.709748	0.781615
ILMN_1771051	RPL29	551.903	449.115	389.469	391.509	368.896	368.22		0.736367	0.780183
ILMN_2112811	RPL36A	293.155	237.715	209.05	231.5	182.41	164.238		0.65298	0.829865
ILMN_1800796	RPL37	118.455	119.131	127.081	125.86	109.645	111.099		0.929113	1.06463
ILMN_1777906	RPRC1	1818.13	1883.31	2446.76	1709.69	2628.06	2215.54		1.30857	1.12293
ILMN_1740587	RPS11	14291.2	13718.6	13916.1	11997.5	12717.3	10902		0.843251	0.925159
ILMN_2399893	RPS24	1992.13	1528.93	1339.61	1529.95	1279.01	1340.07		0.743832	0.814971
ILMN_1657515	RPS6KA5	195.125	206.657	187.105	151.49	146.433	153.934		0.747586	0.842733
ILMN_2364357	RPS6KB2	893.737	1203.93	1088.11	1473.31	1430.21	1533.5		1.41286	1.22107
ILMN_1761175	RPS6KB2	122.936	135.985	130.914	160.566	143.352	152.39		1.14221	1.12575
ILMN_2070072	RPS7	852.651	628.672	466.461	593.424	478.06	543.424		0.689575	0.715499
ILMN_1750722	RPS7	1008.54	736.943	555.556	659.781	517.996	620.387		0.652189	0.696277
ILMN_1783709	RRAGA	1266.35	1604.67	1405	1567.06	1764.67	2132		1.35724	1.03519
ILMN_1771593	RRM1	2777.93	2909.14	2504.58	2699.73	2535.34	2186.13		0.830211	0.915112
ILMN_1689972	RRP9	142.894	132.276	126.701	128.397	115.052	119.388		0.851988	0.927056
ILMN_1767658	RRS1	947.544	790.527	720.691	708.087	635.513	611.873		0.717685	0.822048
ILMN_1682494	RSRC1	290.585	263.25	241.496	260.844	241.228	205.831		0.807208	0.907021
ILMN_2358277	RSRC2	533.777	577.525	499.228	505.318	483.096	456.498		0.84549	0.903937
ILMN_1758827	RTN4IP1	276.07	267.506	234.159	214.518	221.054	215.229		0.802616	0.825418
ILMN_1656540	RUVBL1	284.163	276.149	268.081	235.444	252.886	225.023		0.852934	0.898652
ILMN_2120340	RUVBL2	692.667	658.668	602.354	579.066	532.973	501.293		0.765365	0.874261
ILMN_1796835	RWDD3	185.196	166.6	160.951	155.352	154.185	143.358		0.84578	0.899108
ILMN_1750101	S100A11	953.404	919.882	1220.26	1063.62	1444.5	1464.51		1.55289	1.21918
ILMN_1765459	S100A13	486.218	524.374	581.874	656.551	870.889	746.898		1.60083	1.22545
ILMN_2407168	S100A13	542.357	538.159	649.166	754.039	1011.62	727.363		1.6094	1.29864
ILMN_1728049	S100A16	837.42	901.3	1160.64	1022.42	1349.23	1725.13		1.76817	1.25555
ILMN_1709067	SAMD11	121.528	112.704	119	127.874	101.91	97.3415		0.85066	1.05397
ILMN_2199022	SAP30BP	131.263	121.673	125.13	128.654	140.156	136.954		1.09557	1.00335
ILMN_1736888	SAR1B	578.401	556.846	584.876	592.74	681.406	744.116		1.25569	1.03732
ILMN_1786972	SARS	354.803	336.936	386.384	368.551	416.405	422.364		1.21255	1.09136
ILMN_1655684	SARS2	748.77	743.186	600.04	661.873	504.381	530.24		0.693466	0.845811
ILMN_1712673	SASH1	150.181	155.573	156.38	140.249	164.077	167.358		1.08399	0.970154
ILMN_2089458	SASS6	147.425	145.652	141.548	138.535	121.528	131.01		0.861679	0.955663
ILMN_1765725	SBDSP	468.202	434.185	401.112	455.643	577.226	673.375		1.38588	0.949432
ILMN_1677607	SC5DL	180.625	184.73	189.099	264.319	229.445	275.868		1.38307	1.24103
ILMN_3251337	SCAMP1	107.14	103.447	102.778	101.251	96.9352	98.7281		0.929133	0.968859
ILMN_1795839	SCCPDH	252.318	240.431	267.721	251.016	210.166	221.436		0.875906	1.05274
ILMN_2237428	SCD5	117.032	132.721	151.139	146.982	144.338	176.486		1.28457	1.19366
ILMN_2065773	SCG5	132.877	148.345	378.116	336.016	302.138	364.151		2.36926	2.53939
ILMN_1713995	SCNN1A	130.01	127.499	109.578	112.515	107.481	110.943		0.848217	0.862464
ILMN_1767470	SCPEP1	272.09	325.651	345.694	280.862	373.569	351.058		1.21228	1.04821
ILMN_1731991	SCYL1	172.561	184.735	165.998	201.676	211.457	210.324		1.18048	1.02905
ILMN_1815308	SDC1	1185.92	1444.47	2183.82	2193.54	2678.5	2214.2		1.86007	1.66415
ILMN_1713978	SDF2	606.514	634.079	638.141	754.901	722.899	745.133		1.18333	1.12288
ILMN_3223181	SEC13	497.121	428.764	507.145	509.238	592.841	676.638		1.3711	1.09774
ILMN_1784238	SEC22B	227.569	228.154	247.055	249.122	250.471	278.129		1.15992	1.08877
ILMN_1664051	SEC22C	191.503	178.084	180.619	203.922	203.517	202.051		1.09735	1.04046
ILMN_1659564	SEC61A1	1133.2	1335.07	1561.74	1092.34	1825.08	1637.12		1.40268	1.07528
ILMN_1787026	SEC61G	4230.99	4447.92	4337.91	4438.42	4855.8	5141.81		1.15194	1.01122
ILMN_1762003	SEC62	139.108	129.994	131.371	131.928	110.411	121.479		0.861717	0.978437
ILMN_2381138	SEH1L	252.763	238.086	208.895	216.275	224.024	207.66		0.879465	0.866193
ILMN_1797822	SEL1L3	267.204	314.719	283.144	317.81	421.338	370.286		1.36036	1.0327
ILMN_2134110	SELK	214.92	216.433	220.443	226.345	283.568	313.065		1.38317	1.03578
ILMN_1787680	SELS	1799.93	1943.71	1941.93	2057.71	2321.52	2574.83		1.30791	1.06838
ILMN_1803744	SELS	558.606	483.656	521.471	529.807	610.597	692.148		1.24992	1.00865
ILMN_2054233	SENP6	274.367	274.124	280.484	224.525	251.218	241.607		0.89851	0.920724
ILMN_2343757	SEPT10	161.465	163.954	170.749	141.229	178.196	179.409		1.09891	0.958697
ILMN_1773968	SERBP1	409.763	494.982	430.508	414.308	318.476	337.122		0.724621	0.933761
ILMN_1815656	SERINC3	541	610.824	751.948	569.45	785.582	791.887		1.36954	1.14722
ILMN_2397028	SERPINB8	97.3163	101.586	100.931	100.29	109.706	123.413		1.17202	1.01165
ILMN_1718960	SERPINB8	116.142	114.151	107.248	109.939	124.177	136.22		1.13072	0.943087
ILMN_1744381	PAI1	1886.56	1448.76	2182.6	4854.28	3855	2570.72		1.92657	2.10981
ILMN_1655595	SERPINE2	3561.74	4232.65	7589.87	4225.76	6294.25	5673.53		1.53544	1.51592
ILMN_1794017	SERTAD1	317.875	359.668	447.862	344.145	583.297	416.456		1.47556	1.16894
ILMN_1801934	SERTAD3	359.885	344.524	385.518	385.007	522.731	439.102		1.36545	1.09386
ILMN_1813955	SERTAD3	129.521	131.801	134.083	140.054	163.386	156.66		1.22472	1.04904
ILMN_1800626	SESN1	152.111	141.577	171.185	195.087	195.756	194.617		1.32921	1.24714
ILMN_1724009	SETD6	176.045	164.407	143.467	155.956	129.226	147.998		0.814282	0.879487
ILMN_1697286	SF3A1	159.749	156.713	153.745	158.842	135.49	125.689		0.82531	0.987758
ILMN_2391750	SFMBT1	125.309	124.071	119.207	124.31	115.952	112.833		0.917415	0.976488
ILMN_1807737	SFRS17A	190.442	183.733	187.966	189.924	215.043	230.209		1.18996	1.00993
ILMN_1723212	SFRS3	448.655	446.506	445.846	418.147	357.556	350.451		0.790927	0.965182
ILMN_1662910	SFXN3	107.631	117.424	114.775	114.756	124.952	133.272		1.14738	1.01988
ILMN_2363361	SFXN4	532.855	505.025	487.4	475.457	394.373	462.41		0.825513	0.927715
ILMN_1658437	SFXN4	803.864	843.032	799.823	787.473	679.966	744.771		0.865104	0.96381
ILMN_1657254	SGCD	95.2982	93.5988	100.997	98.8204	103.458	105.028		1.1037	1.05781
ILMN_1702487	SGK	747.279	661.993	966.173	1093.79	1457.75	1004.09		1.74689	1.46172
ILMN_3229324	SGK1	511.31	450.564	666.975	718.223	930.935	640.803		1.63404	1.4401
ILMN_3305938	SGK1	554.422	497.25	685.325	819.963	982.411	718.302		1.61715	1.43133
ILMN_1730825	SGOL1	331.941	319.83	275.169	240.143	251.971	209.794		0.708476	0.790633
ILMN_2404906	SGOL1	216.629	203.306	198.489	173.393	189.279	156.615		0.823684	0.88557
ILMN_1754126	SH2D5	139.895	154.185	113.71	120.747	121.837	130.855		0.859263	0.797256
ILMN_1737163	SH3BGRL3	322.143	330.089	411.19	447.611	407.587	529.493		1.43673	1.31671
ILMN_1665384	SH3BP5L	123.648	120.323	126.644	123.081	147.828	141.619		1.1864	1.02359
ILMN_1766045	SH3GLB1	428.905	411.946	408.984	404.873	506.419	577.506		1.28908	0.967896
ILMN_1810782	SH3KBP1	1721.01	1760.95	2292.44	1885.16	2464.41	3412.83		1.68791	1.19978
ILMN_1808501	SH3KBP1	1531.19	1605.51	2287.55	1525.77	2556	3386.39		1.89447	1.21571
ILMN_1743103	SH3PXD2A	143.47	145.25	266.121	155.336	234.157	235.893		1.62805	1.45975
ILMN_1764723	SH3PXD2B	114.054	108.901	120.75	110.1	124.293	122.533		1.10706	1.03541
ILMN_1701967	SHC1	95.823	96.9052	96.525	102.322	105.5	106.727		1.10117	1.03175
ILMN_1721022	SHC1	1340.1	1469.83	1696.41	1944.72	2213.33	2295.99		1.60479	1.29581
ILMN_1743784	SHMT1	108.657	114.073	98.106	104.858	100.619	102.028		0.909831	0.911255
ILMN_3245062	SHROOM3	122.004	112.184	107.555	103.81	96.6377	107.025		0.869657	0.902547
ILMN_1801313	SIAH2	145.548	135.65	138.824	146.576	172.74	161.699		1.18933	1.01494
ILMN_1717639	SIK1	318.39	286.035	402.966	539.346	397.944	437.669		1.38249	1.55902
ILMN_3235647	SIK1	199.693	180.486	260.083	307.227	263.667	236.975		1.31686	1.49222
ILMN_1732343	SIK3	213.777	211.375	208.748	191.885	189.25	178.295		0.864505	0.942328
ILMN_2399392	SIL1	145.168	134.059	150.577	153.168	165.829	157.417		1.15765	1.08781
ILMN_2344002	SIP1	429.197	383.496	351.272	348.19	322.595	352.4		0.830566	0.860671
ILMN_1771224	SKA1	158.345	151.544	158.208	131.497	141.814	128.758		0.873128	0.93487
ILMN_1657129	SKAP2	234.892	239.805	264.068	229.188	284.702	335.181		1.30585	1.0391
ILMN_1666512	SKIV2L	190.437	201.779	193.286	196.604	225.065	231.689		1.16455	0.99407
ILMN_2227248	SLAMF9	94.8826	93.4529	99.0283	96.6705	102.085	105.04		1.09977	1.0391
ILMN_1753353	SLBP	414.813	378.92	336.676	371.822	331.425	300.427		0.796051	0.892615
ILMN_2055700	SLBP	857.513	955.696	888.109	882.443	715.654	672.939		0.76582	0.976474
ILMN_1712887	SLC10A3	153.557	161.763	169.61	189.207	195.962	207.376		1.27914	1.13795
ILMN_2364022	SLC16A3	237.539	394.92	501.16	534.177	767.847	603.05		2.16757	1.637
ILMN_1672662	SLC20A1	1364.91	1484.02	1450.54	1259.97	2342.23	2339.34		1.64327	0.951416
ILMN_1701655	SLC24A6	176.875	198.89	184.987	192.557	236.304	233.331		1.24981	1.00473
ILMN_1804090	SLC25A10	333.265	328.213	302.918	240.763	277.709	252.119		0.800976	0.821917
ILMN_2070013	SLC25A15	149.951	149.82	146.206	140.226	122.364	133.984		0.855147	0.955498
ILMN_1679949	SLC25A23	346.621	449.074	477.955	493.987	637.991	521.191		1.45682	1.2215
ILMN_2211780	SLC25A4	447.008	506.125	487.511	540.17	555.857	689.962		1.30708	1.07821
ILMN_1681670	SLC25A4	192.43	204.807	199.376	220.631	256.078	265.217		1.3123	1.05732
ILMN_1810514	SLC25A44	415.152	461.159	430.021	369.116	527.029	501.292		1.17347	0.911933
ILMN_3240838	SLC25A6	1122.94	1134.62	1483.26	1817.01	1377.12	1374.63		1.2189	1.46188
ILMN_1775708	SLC2A3	240.855	169.518	187.43	566.805	467.076	712.553		2.87453	1.83792
ILMN_1740430	SLC2A4RG	391.739	381.114	352.829	474.426	328.791	295.329		0.807555	1.07039
ILMN_1778321	SLC2A6	452.383	452.478	537.445	696.696	536.695	794.25		1.47088	1.3639
ILMN_1702683	SLC33A1	202.453	176.331	201.995	168.535	235.544	302.149		1.41953	0.97821
ILMN_1794959	SLC35F3	133.074	116.983	102.665	117.522	108.923	107.018		0.86357	0.880547
ILMN_1814797	SLC35F3	231.318	198.565	174.877	170.658	168.931	157.276		0.758829	0.803788
ILMN_2124471	SLC36A1	155.877	151.838	154.77	148.611	175.975	173.741		1.13649	0.985917
ILMN_1678678	SLC37A4	529.83	521.323	514.746	335.251	379.653	442.082		0.781747	0.808633
ILMN_1764629	SLC39A14	340.344	314.279	343.988	298.689	362.362	398.755		1.16268	0.981751
ILMN_1750394	SLC39A6	235.072	247.182	263.173	249.68	279.597	277.884		1.15599	1.06345
ILMN_1754247	SLC3A1	338.94	276.238	209.083	232.109	196.154	156.019		0.572474	0.717178
ILMN_1670325	SLC47A1	317.534	344.481	310.265	247.899	258.98	258.76		0.782067	0.843129
ILMN_1735156	SLC4A11	117.998	117.099	103.02	104.675	98.3574	105.489		0.867077	0.883449
ILMN_1810533	SLC6A15	98.1304	119.995	140.438	110.586	130.839	147.149		1.27444	1.15082
ILMN_1765607	SLC6A2	84.5526	88.2647	85.7282	85.7056	95.9788	94.171		1.10029	0.991995
ILMN_1800425	SLC9A1	209.313	255.19	190.513	267.866	357.903	283.944		1.38179	0.986816
ILMN_1742224	SLTM	469.117	485.174	464.898	433.771	380.024	382.111		0.798639	0.941713
ILMN_1767068	SMAD6	694.118	785.974	603.043	673.643	602.139	492.965		0.739889	0.862572
ILMN_1804415	SMAGP	238.878	232.335	241.005	265.367	276.57	291.801		1.20619	1.07461
ILMN_1768271	SMAP1	168.566	163.849	175.985	167.932	150.252	146.777		0.89355	1.0346
ILMN_2411190	SMC2	313.979	307.483	321.603	265.427	259.802	230.029		0.788192	0.944595
ILMN_1718807	SMC3	547.881	601.257	550.423	507.202	516.74	471.985		0.860406	0.920364
ILMN_2182348	SMC3	163.445	152.31	152.781	166.422	144.968	137.778		0.89546	1.01092
ILMN_1654001	SMC6	272.375	247.151	236.513	243.39	205.442	206.464		0.79285	0.923732
ILMN_1757370	SMPD1	90.5206	97.623	96.4032	96.4037	113.413	103.151		1.15106	1.02479
ILMN_1785618	SMTN	139.328	131.401	158.503	166.263	228.357	170.318		1.4726	1.1996
ILMN_2082585	SNAI2	153.557	147.736	299.839	314.808	312.278	187.79		1.65974	2.04003
ILMN_1803611	SNAPC3	253.8	259.054	227.232	307.241	292.97	280.369		1.11794	1.04215
ILMN_1775111	SND1	409.399	378.207	468.223	442.632	477.014	534.243		1.28396	1.15649
ILMN_3249059	SNHG12	117.272	127.42	118.38	117.696	106.244	113.378		0.897545	0.96479
ILMN_1661673	SNHG4	132.712	134.684	119.878	135.671	111.248	110.485		0.829234	0.955696
ILMN_3233229	SNHG7	343.679	331.37	351.226	311.927	257.372	278.108		0.793244	0.982377
ILMN_3227023	SNHG7	1118.01	1126.08	1103.45	1033.86	875.13	926.936		0.803027	0.952419
ILMN_3243129	SNORA17	100.573	104.372	99.7611	99.2752	95.1982	97.3168		0.939349	0.971169
ILMN_3235397	SNORD110	153.535	161.077	148.191	144.187	136.198	133.701		0.85788	0.929329
ILMN_3243244	SNORD80	308.483	297.078	302.591	239.009	230.98	226.256		0.755062	0.894377
ILMN_3241369	SNORD91A	99.6966	102.886	95.938	104.202	93.1341	92.3249		0.915475	0.987943
ILMN_1779399	SNRPA	378.944	399.521	372.936	365.992	324.973	298.623		0.801059	0.949212
ILMN_1678966	SNRPF	4058.31	4052.52	3564.46	3304.01	3608.31	3334.33		0.855973	0.846828
ILMN_1753241	SNTA1	129.525	130.214	142.623	151.115	146.693	141.474		1.10945	1.1309
ILMN_1808374	SNTB2	405.117	376.297	293.114	366.171	340.994	264.982		0.775486	0.843707
ILMN_1688413	SNW1	362.318	330.751	334.139	287.748	301.818	304.969		0.875507	0.897295
ILMN_1673676	SNX5	767.573	805.278	673.373	673.655	600.316	480.625		0.68725	0.856425
ILMN_1709772	SNX5	565.761	547.379	549.04	465.519	452.837	492.78		0.849504	0.911439
ILMN_1798926	SOCS2	207.372	194.76	187.593	199.557	147.371	150.843		0.741583	0.962746
ILMN_2131861	SOCS2	516.542	555.998	478.529	566.611	418.289	367.406		0.732555	0.974453
ILMN_1668463	SON	112.423	109.09	108.92	115.767	104.125	105.877		0.94803	1.01433
ILMN_2236800	SON	145.843	140.784	144.757	141.015	119.966	127.535		0.863493	0.997017
ILMN_2177156	SOX2	108.239	112.353	105.938	109.511	90.2207	97.1258		0.84929	0.976689
ILMN_1815032	SOX7	149.44	122.813	108.615	127.143	103.993	108.408		0.780162	0.865951
ILMN_1678423	SPA17	420.22	329.382	349.899	308.106	291.445	272.246		0.751987	0.877806
ILMN_1796738	SPAST	283.649	250.171	264.902	233.221	228.713	200.29		0.803646	0.933128
ILMN_1791547	SPAST	106.003	103.675	105.894	97.0346	94.7125	95.5094		0.90721	0.967812
ILMN_1667948	SPATA18	125.667	115.617	141.1	140.748	145.63	172.547		1.31868	1.16812
ILMN_3307700	SPCS3	242.249	262.331	238.958	352.053	306.008	345.062		1.29032	1.17129
ILMN_1667707	SPCS3	171.995	202.678	198.503	218.717	228.454	229.287		1.22171	1.11356
ILMN_1689251	SPG3A	116.466	109.22	120.209	124.643	146.09	142.981		1.28085	1.08492
ILMN_2381476	SPG3A	135.984	131.429	142.938	159.885	183.789	175.63		1.34406	1.13242
ILMN_2357134	SPHK1	94.546	99.5515	128.298	136.02	162.51	141.654		1.56707	1.36178
ILMN_1755124	SPIC	121.037	113.51	100.008	106.743	100.586	100.592		0.85773	0.881491
ILMN_1784948	SPOCD1	105.313	117.576	141.843	184.509	227.614	237.46		2.08658	1.46419
ILMN_1651354	SPP1	1585.93	1296.44	1854.6	2043.95	1962.65	3355.28		1.84498	1.35255
ILMN_1734229	SPPL2A	645.611	667.052	668.726	712.35	734.094	737.68		1.12121	1.05212
ILMN_1729868	SPRYD4	179.474	182.847	152.666	173.539	154.504	159.909		0.867775	0.900322
ILMN_1798827	SRBD1	231.101	254.689	212.113	199.795	211.664	191.151		0.829194	0.847915
ILMN_1721024	SRFBP1	254.345	236.798	215.893	239.388	210.145	180.385		0.795145	0.926983
ILMN_1759883	SRP9	250.665	260.667	240.801	232.608	187.785	212.329		0.782493	0.925835
ILMN_1798804	SRPK1	659.024	624.629	616.311	578.566	448.134	539.038		0.769033	0.930841
ILMN_1751072	SRPRB	607.337	656.087	711.756	665.884	751.761	878.465		1.29032	1.0904
ILMN_1709486	SRPX	160.973	262.897	548.72	407.216	460.757	447.018		2.14164	2.25526
ILMN_1697670	SRRM1	901.026	1018.49	956.411	790.482	825.601	734.171		0.812584	0.910067
ILMN_1672006	SSB	1398.89	1342.54	1340.74	995.022	1012.37	930.118		0.708567	0.852021
ILMN_1720844	SSX2IP	122.299	118.57	123.602	105.736	105.132	108.037		0.885003	0.952124
ILMN_1773470	ST5	104.949	111.741	118.47	119.253	132.783	118.867		1.16133	1.09706
ILMN_1746137	ST7	194.515	219.488	197.092	228.359	230.954	251.429		1.16517	1.02765
ILMN_1707763	ST7	152.54	164.147	164.124	202.621	180.006	190.833		1.17099	1.15807
ILMN_1717052	STARD10	183.884	177.294	206.262	152.358	217.491	221.858		1.21643	0.992919
ILMN_1690105	STAT1	259.04	212.556	199.661	210.933	196.297	187.347		0.813501	0.870646
ILMN_1777325	STAT1	650.568	678.038	549.746	630.191	562.347	566.858		0.849917	0.888102
ILMN_1758164	STC1	127.497	149.814	260.142	273.114	625.061	304.47		3.35195	1.92296
ILMN_1666453	STK3	383.755	316.941	336.195	337.078	295.564	271.201		0.80886	0.960863
ILMN_2216637	STK32B	229.799	256.364	174.68	240.586	165.951	177.523		0.7065	0.85417
ILMN_1657796	STMN1	442.978	446.484	420.105	423.639	394.167	320.7		0.803707	0.9486
ILMN_1663002	STOML2	2317.3	2116.64	1930.09	2055.02	1677.21	1945.09		0.816948	0.898775
ILMN_1769634	STRA13	1545.32	1664.64	1456.11	1442.21	1350.92	1329.41		0.835005	0.902915
ILMN_1808783	STRBP	235.087	225.833	209.492	215.54	191.542	197.711		0.844511	0.922137
ILMN_1773901	STX12	144.736	129.307	153.292	155.684	160.28	198.773		1.31021	1.12747
ILMN_1749345	STX5	420.499	418.527	494.47	422.01	515.051	510.057		1.22178	1.09231
ILMN_1777444	STX5	111.892	111.753	122.218	117.499	121.179	128.834		1.1179	1.07186
ILMN_1808860	STX5	177.485	174.407	184.251	179.441	200.216	230.615		1.22433	1.03353
ILMN_1684402	STXBP5	166.787	170.539	214.749	199.203	245.843	205.512		1.33804	1.22716
ILMN_1652379	SUCLG2	570.284	549.674	533.915	488.275	422.914	312.404		0.656558	0.912703
ILMN_1670517	SULT1A3	159.03	166.484	171.122	185.691	141.907	135.209		0.85132	1.09616
ILMN_1707804	SULT1A3	132.568	120.111	118.915	125.768	106.246	112.231		0.86464	0.968354
ILMN_3250899	SULT1A3	122.045	112.07	105.6	107.918	98.1663	103.78		0.862597	0.912021
ILMN_2336130	SULT1A4	169.264	154.656	143.932	153.117	123.863	142.049		0.820918	0.917044
ILMN_2336133	SULT1A4	154.557	146.739	138.253	148.155	127.595	138.142		0.88198	0.950584
ILMN_1727589	SULT2B1	123.398	105.303	99.0603	114.932	93.7269	88.2156		0.795546	0.935687
ILMN_1690761	SURF4	412.587	610.822	684.844	677.706	867.997	1036.11		1.86055	1.33138
ILMN_1797813	SUZ12	2673.06	2554.89	2347.04	1981.39	2275.58	2144.76		0.845521	0.827942
ILMN_1697095	SUZ12P	121.369	121.915	110.699	122.338	110.215	101.453		0.870041	0.95788
ILMN_1656678	SUZ12P	109.21	106.118	104.46	103.634	95.6325	96.6975		0.893199	0.966407
ILMN_1690754	SVIL	138.623	132.826	133.467	130.669	121.238	126.19		0.911508	0.973057
ILMN_2059549	SYK	88.5745	90.5153	86.6294	93.5743	98.6896	94.9064		1.081	1.00622
ILMN_2215119	SYNJ2	200.58	212.924	236.482	177.276	177.051	173.709		0.848264	1.00061
ILMN_1764087	SYPL1	1196.13	1179.2	1148.9	1372.86	1005.62	895.281		0.800268	1.06164
ILMN_1742881	SYT1	129.421	130.996	180.632	151.559	214.151	218.73		1.66226	1.27561
ILMN_1787081	TADA2A	133.619	127.064	119.939	127.826	121.126	120.267		0.925999	0.950442
ILMN_1721093	TAF10	585.766	614.589	552.571	603.633	715.067	727.628		1.20189	0.963218
ILMN_1778668	TAGLN	702.957	609.553	2123.85	2185.58	6489.69	6113.43		9.6023	3.28335
ILMN_2400935	TAGLN	179.794	152.159	398.049	387.379	1150.57	1002.36		6.48565	2.36609
ILMN_3244286	TANC2	155.128	153.004	190.357	206.499	244.549	198.224		1.43696	1.28794
ILMN_1751079	TAP1	569.379	501.719	505.486	392.594	727.272	649.333		1.28523	0.838466
ILMN_1742450	TAPBP	277.324	280.155	310.671	291.218	344.623	319.074		1.19053	1.07966
ILMN_1677532	TARDBP	135.609	135.403	131.338	131.668	121.502	123.898		0.905494	0.970461
ILMN_1756542	TBC1D17	105.078	104.795	100.367	108.998	113.742	121.98		1.12317	0.997585
ILMN_1692844	TBC1D19	129.938	129.733	126.703	125.477	138.905	148.89		1.10831	0.971152
ILMN_2357770	TCEA1	1187.95	1204.46	978.973	944.275	795.426	984.238		0.743878	0.803893
ILMN_1709851	TCEA1	205.391	219.104	195.057	184.896	160.288	178.879		0.798989	0.895069
ILMN_2398403	TCEAL1	258.137	264.914	319.271	300.353	345.443	392.118		1.41011	1.18463
ILMN_2398408	TCEAL1	209.104	181.637	214.529	221.345	232.44	264.038		1.27061	1.1155
ILMN_1749478	TCEAL3	208.255	240.82	245.926	279.704	344.265	357.728		1.5632	1.17047
ILMN_1734190	TCEAL3	340.078	456.46	444.635	469.531	638.806	736.588		1.72671	1.14768
ILMN_1808110	TCEB3	210.317	205.053	236.794	219.393	262.446	237.153		1.20278	1.09826
ILMN_1672486	TCF7L2	123.297	124.22	113.872	119.702	114.613	112.25		0.916557	0.943671
ILMN_2313434	TCP1	204.565	234.453	198.12	195.629	192.142	176.435		0.839547	0.896885
ILMN_1745779	TCTEX1D2	191.296	196.731	217.255	190.499	171.683	148.251		0.824515	1.05084
ILMN_1657983	TERF2IP	227.322	241.918	207.915	230.721	285.011	348.549		1.35018	0.93478
ILMN_1765574	TFAP2A	704.772	899.275	728.45	912.566	562.453	484.414		0.652641	1.02305
ILMN_2374115	TFAP2A	155.665	168.48	140.194	148.067	120.304	136.515		0.792295	0.889293
ILMN_1812474	TFG	1088.33	974.142	1072.08	686.709	1142.02	1280.05		1.17436	0.852759
ILMN_1726245	TGFBR2	397.53	565.248	713.731	546.233	609.626	753.406		1.41573	1.30868
ILMN_1705750	TGM2	341.205	420.529	732.799	637.761	1072.27	907.054		2.59844	1.79926
ILMN_1797236	TGM2	100.279	104.742	106.999	113.47	118.917	114.339		1.13771	1.07534
ILMN_2301955	THAP1	146.62	145.264	136.373	124.507	128.096	133.735		0.89704	0.89378
ILMN_1652486	THAP7	118.757	116.236	109.282	116.501	107.602	107.634		0.915922	0.960806
ILMN_1686116	THBS1	372.428	289.883	551.643	564.4	661.751	484.77		1.73109	1.68507
ILMN_1802157	THOC1	288.442	284.41	268.835	252.942	245.588	219.737		0.812296	0.910842
ILMN_2390821	THOC2	973.173	887.413	852.33	890.452	762.985	562.097		0.712185	0.936684
ILMN_1696883	THOC2	179.123	169.573	162.443	164.094	150.876	151.635		0.867552	0.936453
ILMN_1679880	THOC6	242.998	215.585	214.923	174.731	184.042	170.126		0.772308	0.849689
ILMN_1651346	TICAM2	122.745	129.052	123.748	143.193	138.881	140.702		1.11035	1.06014
ILMN_1735093	TIMELESS	759.524	814.235	683.366	551.184	620.857	540.113		0.737705	0.784459
ILMN_1697420	TINF2	170.204	210.605	240.45	178.728	250.878	285.757		1.4092	1.10076
ILMN_1761939	TIPIN	352.049	276.292	268.728	265.695	223.586	247.394		0.749562	0.850531
ILMN_1736597	TKT	6008.73	6062.44	5291.52	4496.15	4733.38	4552.06		0.769225	0.81083
ILMN_1696643	TLN1	227.395	221.911	268.914	316.446	333.024	327.777		1.47072	1.30281
ILMN_1785765	TM9SF2	730.36	788.172	849.818	817.246	871.872	1094.15		1.29469	1.09781
ILMN_1705213	TMBIM1	221.444	225.952	248.421	207.044	264.204	328.788		1.32543	1.01804
ILMN_1730117	TMC5	121.921	116.936	101.278	101.972	99.3527	104.972		0.855427	0.85093
ILMN_1719316	TMED3	3076.68	3790.48	4223.88	3999.49	4173.83	4885.66		1.31925	1.19749
ILMN_1743655	TMED9	1122.33	1139.91	1168.51	958.408	1505.06	1532.66		1.3428	0.940184
ILMN_1738093	TMEM118	335.849	399.904	316.034	312.18	270.457	296.469		0.770538	0.853838
ILMN_1724139	TMEM123	1816.66	1453.3	1469.13	1201.82	1283.56	1217.51		0.764864	0.816816
ILMN_2340721	TMEM134	186.431	180.212	197.998	190.2	215.036	212.044		1.16484	1.05879
ILMN_1786426	TMEM149	127.461	128.514	124.444	130.384	117.345	118.89		0.922884	0.995518
ILMN_1685258	TMEM14B	2631.53	2196.8	2007.43	2005.8	1452.07	1593.76		0.630825	0.831184
ILMN_1657857	TMEM14C	1854.16	1505.86	1487.36	1475.06	1163.75	1407.78		0.765333	0.881667
ILMN_3244248	TMEM14D	2218.66	2066.7	1712.48	1513.33	1296.02	1411.42		0.63179	0.752752
ILMN_1683494	TMEM154	101.099	101.485	101.035	101.87	113.724	112.8		1.11818	1.00158
ILMN_1792455	TMEM158	707.487	1419.23	1234.36	1937.13	3132.87	2483.29		2.64077	1.49126
ILMN_2042941	TMEM159	122.741	119.911	132.146	118.214	152.718	136.974		1.19386	1.03177
ILMN_3236428	TMEM170B	136.971	125.556	131.768	135.275	114.162	105.432		0.836461	1.0172
ILMN_1747460	TMEM184B	184.445	195.289	205.166	193.327	236.056	230.959		1.22985	1.0494
ILMN_2231021	TMEM185B	197.037	187.623	216.132	200.761	228.611	218.004		1.16106	1.08379
ILMN_1794989	TMEM191B	109.535	107.329	98.8322	96.729	94.9998	97.6042		0.888133	0.901769
ILMN_1812678	TMEM195	97.0589	98.245	105.979	101.778	104.933	104.423		1.07195	1.06376
ILMN_1784661	TMEM2	473.412	531.045	556.03	319.195	745.517	683.839		1.42301	0.871341
ILMN_3297644	TMEM214	170.545	170.108	171.881	157.597	187.042	190.038		1.10693	0.967196
ILMN_2395856	TMEM218	454.678	471.171	403.123	421.989	364.225	399.282		0.824656	0.891195
ILMN_1735680	TMEM30A	169.904	166.369	185.015	209.589	190.286	201.663		1.16557	1.17346
ILMN_1770922	TMEM45A	96.237	101.799	98.9687	102.685	109.764	115.373		1.13685	1.01827
ILMN_2148913	TMEM45A	104.206	112.833	117.351	134.937	144.504	139.255		1.3074	1.16241
ILMN_1782429	TMEM56	237.23	223.647	232.526	245.121	191.616	165.942		0.775818	1.03638
ILMN_1792508	TMEM59	933.996	1128.16	1249.51	1127.61	1438.16	1437.53		1.39451	1.15274
ILMN_3245912	TMEM59L	102.347	114.531	125.533	121.001	119.863	123.479		1.12202	1.13674
ILMN_2150402	TMEM64	191.641	195.243	198.166	225.252	171.95	141.836		0.81106	1.09443
ILMN_1739032	TMEM70	156.035	166.996	148.285	156.201	140.763	144.221		0.882217	0.942591
ILMN_1706718	TMEM80	83.7998	82.6704	89.6651	87.8638	94.5111	89.385		1.10468	1.06643
ILMN_1679693	TMEM87B	101.288	112.613	107.077	109.243	120.421	139.645		1.21582	1.01131
ILMN_2092223	TMEM92	99.9456	104.323	101.215	118.292	121.921	117.601		1.17258	1.07461
ILMN_1710962	TMEM97	1812.6	2064.6	1684.9	1865.48	1424.77	1435.14		0.737621	0.915706
ILMN_1779182	TMEM98	467.947	486.121	595.432	647.992	821.087	626.647		1.51743	1.30329
ILMN_2100815	TMEM9B	340.412	413.917	417.355	459.592	449.653	565.732		1.34608	1.16255
ILMN_1677747	TMPO	187.189	191.099	196.21	164.282	154.547	142.07		0.784103	0.952954
ILMN_2047206	TMX3	192.229	179.422	214.9	168.262	154.685	164.011		0.857516	1.03097
ILMN_1719759	TNC	97.6236	98.4619	108.597	111.404	152.892	151.654		1.55313	1.12197
ILMN_2145670	TNC	107.918	108.717	117.507	117.748	178.247	159.842		1.56064	1.08595
ILMN_1655429	TNFAIP1	284.046	326.739	365.437	348.366	484.251	368.312		1.39585	1.16867
ILMN_2414325	TNFAIP8	400.674	316.247	261.752	255.613	274.985	236.123		0.712921	0.72165
ILMN_1684346	TNFAIP8L1	221.919	249.073	220.778	241.161	194.491	156.897		0.74606	0.980777
ILMN_1682099	TNFAIP8L3	113.679	111.28	132.512	108.419	137.825	148.691		1.27364	1.071
ILMN_2331010	TNFRSF10B	166.111	163.641	176.55	176.286	201.519	219.606		1.2771	1.07
ILMN_1666022	TNFRSF10D	138.032	134.602	136.9	177.859	230.369	186.414		1.52873	1.15451
ILMN_1689004	TNFRSF12A	1590.56	1362.85	1601.49	2029.16	1999.55	1989.04		1.35051	1.22931
ILMN_1751464	TNFSF9	174.374	123.293	162.554	154.816	227.759	193.967		1.41678	1.0662
ILMN_1726786	TNRC6B	178.525	185.192	210.586	183.494	206.23	235.549		1.21462	1.08348
ILMN_1667893	TNS3	2443.31	2035.07	1976.94	1895.65	1691.28	1505.85		0.713906	0.864732
ILMN_1765523	TOLLIP	123.244	123.49	121.784	126.317	137.618	146.77		1.15261	1.00554
ILMN_2082314	TOM1	206.118	215.054	251.082	219.858	256.101	326.524		1.38334	1.11816
ILMN_1721128	TOMM34	887.258	1153.68	1249.73	989.67	1441.44	1682.23		1.53051	1.09724
ILMN_2065606	TOMM40L	143.523	158.072	149.844	158.955	166.002	181.324		1.15163	1.02388
ILMN_1686097	TOP2A	2055.47	2098.6	1959.89	1792.12	1746.61	1444.72		0.768242	0.903214
ILMN_2113938	TOR1AIP2	131.971	133.844	134.621	130.717	154.592	142.793		1.11876	0.998204
ILMN_2358919	TP53I3	1227.07	1115.71	1875.42	1188.5	2005.02	1624.31		1.54915	1.30781
ILMN_2214197	TP53INP1	150.731	146.305	322.391	197.692	209.902	254.157		1.5623	1.75091
ILMN_1714108	TP53INP1	186.42	194.849	430.222	253.943	270.089	353.633		1.63591	1.79444
ILMN_1686906	TP53INP2	100.811	97.0477	103.255	100.429	118.441	122.824		1.21938	1.02944
ILMN_3305055	TP63	122.305	101.924	124.852	112.826	169.346	137.147		1.36687	1.05998
ILMN_2138801	TP73L	99.5964	89.6107	103.639	98.5749	125.099	105.191		1.21713	1.06874
ILMN_2381064	TPD52	171.375	171.398	154.461	175.437	135.875	157.84		0.856878	0.962436
ILMN_1789196	TPM2	3267.4	3360.47	4919.54	5129.74	7664.55	6057.91		2.07042	1.51621
ILMN_1757604	TPM2	2209.01	1881.3	3034.28	2950.94	4559.41	3883.34		2.06409	1.46327
ILMN_1727479	TPRG1L	536.43	541.074	569.157	670.081	725.201	1269.98		1.85167	1.1501
ILMN_1651950	TPST1	135.006	162.395	173.031	159.041	211.817	183.213		1.32827	1.11658
ILMN_1695432	TPST2	153.533	146.356	165.904	211.109	190.635	167.459		1.19409	1.25717
ILMN_2399174	TRAK1	113.3	113.412	112.492	122.873	127.999	134.048		1.15585	1.03817
ILMN_1699737	TRAP1	534.719	471.12	451.482	399.316	369.759	372.659		0.738109	0.845859
ILMN_1716913	TRAPPC1	530.062	511.358	562.711	630.594	725.383	744.397		1.41132	1.14584
ILMN_1747058	TRAPPC2L	680.717	652.187	676.457	616.018	793.588	940.753		1.30118	0.969669
ILMN_2211122	TRAPPC2P1	257.47	238.924	281.028	321.945	297.016	287.812		1.17815	1.21471
ILMN_2372639	TRAPPC5	415.158	381.436	462.463	459.905	462.862	467.728		1.16821	1.15789
ILMN_1678054	TRIM21	128.947	125.678	122.424	118.515	143.711	145.037		1.13401	0.946251
ILMN_1654737	TRIM32	237.602	240.252	274.501	270.135	301.28	287.149		1.2314	1.13975
ILMN_2351930	TRIM33	176.75	188.949	171.499	168.576	160.961	171.869		0.910118	0.929932
ILMN_1682316	TRIM33	274.075	288.618	268.751	277.914	218.289	248.185		0.829002	0.971514
ILMN_1674580	TRIM36	95.6095	94.1835	102.056	114.728	102.099	101.975		1.07524	1.14221
ILMN_1796063	TRIM44	437.204	412.3	459.324	386.643	489.37	501.028		1.16586	0.995837
ILMN_1712708	TRIM47	223.613	193.52	160.322	158.618	136.204	156.323		0.70128	0.7646
ILMN_1784799	TRIM59	116.583	111.806	110.671	108.349	100.891	96.8267		0.865703	0.958977
ILMN_1656910	TRIM6	377.129	382.668	324.931	380.247	284.187	307.252		0.778417	0.928113
ILMN_1796589	TRIP13	986.954	1060.34	860.203	952.891	911.398	736.839		0.80508	0.885604
ILMN_1776125	TRK1	123.954	129.476	114.678	126.86	109.971	113.289		0.88095	0.953075
ILMN_2402806	TRPC4AP	288.473	274.295	281.549	323.298	319.709	332.182		1.15837	1.07477
ILMN_2246510	TSC1	273.539	311.456	328.624	294.088	340.809	343.197		1.16925	1.06448
ILMN_1746393	TSEN2	469.696	448.827	390.821	414.238	382.274	351.138		0.798469	0.876471
ILMN_1713668	TSNAX	483.432	402.578	383.26	433.005	293.99	361.001		0.739258	0.921282
ILMN_1656194	TSPAN10	145.773	156.143	197.972	198.025	202.826	285.452		1.61726	1.31161
ILMN_1777881	TSPAN17	1076.93	1153.27	1330.91	1315.39	1542.88	1408.12		1.3232	1.18657
ILMN_1729453	TSPAN9	489.228	500.885	586.565	660.303	631.903	717.483		1.36286	1.25932
ILMN_2260991	TSPO	475.356	440.946	534.275	521.174	539.642	567.081		1.20782	1.15186
ILMN_1657554	TSPYL2	104.624	113.302	134.352	129.777	127.776	124.614		1.15814	1.21201
ILMN_2083588	TTC32	351.913	341.849	326.746	394.081	280.43	296.463		0.831544	1.03901
ILMN_2183389	TTC9C	148.958	145.315	153.688	122.952	176.902	168.349		1.17324	0.940079
ILMN_2364131	TTPAL	270.565	257.603	332.198	267.855	336.588	322.18		1.24727	1.1361
ILMN_1744442	TTPAL	209.277	199.924	240.62	204.521	256.158	237.038		1.20527	1.08783
ILMN_1692731	TTYH3	170.786	197.747	214.682	223.484	232.083	236.043		1.27024	1.18895
ILMN_2038775	TUBB2A	375.587	323.363	381.039	359.445	442.846	421.798		1.23706	1.05942
ILMN_1699489	TUBB6	447.042	414.93	476.462	525.9	577.669	475.141		1.2214	1.16287
ILMN_1698646	TUBG1	201.732	196.443	168.284	176.656	161.098	159.668		0.805591	0.866301
ILMN_1783753	TXNDC12	1795.91	1910.73	2035.12	2122.08	2147.52	2419.79		1.2322	1.12156
ILMN_1799367	TXNDC14	1155.62	1137.3	1074.3	944.708	970.455	890.57		0.81164	0.880541
ILMN_1790218	TXNL4A	113.692	109.944	107.566	105.505	102.177	102.302		0.914336	0.95276
ILMN_2248725	TYSND1	116.185	110.929	109.259	116.726	102.106	101.302		0.895623	0.995029
ILMN_2385173	U2AF2	139.788	148.824	130	126.036	129.698	119.713		0.864175	0.887128
ILMN_1742461	UAP1	356.763	334.717	419.231	413.062	427.832	459.9		1.28381	1.20364
ILMN_1675085	UBA6	391.836	423.645	661.852	432.685	604.784	683.063		1.57925	1.3422
ILMN_2301083	UBE2C	2938.27	2639.12	2291.88	2241.7	2251.93	1752.46		0.717968	0.81285
ILMN_2265654	UBE2C	152.657	138.64	131.091	133.746	121.301	123.086		0.838961	0.909164
ILMN_2127624	UBE2CBP	124.003	122.592	121.074	120.254	114.225	111.636		0.915915	0.978639
[truncated: 123 more rows]

## Sheet: |FOLD CHANGE| >  1.5 RELB
		Normalised probe intensity (mean three biological replicates)							Ratios
Probe	Gene	siCtrl	siCtrl-2	siATG5	siULK1	siRELB	siRELB-2		RELB/NTC	ATG/NTC
ILMN_1788457	ABCC4	562.718	459.513	468.245	431.713	321.762	314.338		0.622267	0.880386
ILMN_2194009	ABCC4	692.038	595.608	563.041	544.958	411.134	336.579		0.580682	0.860484
ILMN_1716237	ACOT2	278.408	309.98	328.662	335.377	567.259	320.208		1.5083	1.12857
ILMN_1683598	ACSL4	317.004	339.468	429.61	552.747	571.768	478.371		1.59967	1.49642
ILMN_1671703	ACTA2	827.372	689.311	1681.26	1255.33	1801.67	1741.21		2.33594	1.93619
ILMN_1795325	ACTG2	84.3637	85.5512	98.6483	113.339	268.034	323.499		3.48135	1.24761
ILMN_1713751	ADAM19	514.644	540.55	1174.37	1385.2	1979.64	1298.91		3.10705	2.42569
ILMN_2278335	AKR1B15	5195.07	4059.86	2836.41	3644.78	2042.68	3434.71		0.591835	0.700296
ILMN_2412336	AKR1C2	14234.6	9424.19	5749.48	8642.51	5999.88	6075.19		0.510385	0.608316
ILMN_1687757	AKR1C4	9480.26	6117.86	3867.33	5591.56	3692.54	4292.91		0.511949	0.606412
ILMN_1702503	ALDH3A1	3542.07	2481.72	1473.34	1218.09	1125.02	2095.9		0.5347	0.4468
ILMN_1667564	ALDH3A2	290.396	286.204	187.468	205.44	197.794	159.495		0.619648	0.681423
ILMN_2401641	ALDH3A2	739.467	771.235	553.213	456.577	489.148	442.565		0.616741	0.668424
ILMN_1797875	ALOX5AP	181.889	176.197	292.317	355.312	349.153	229.888		1.61705	1.80859
ILMN_1707727	ANGPTL4	390.336	427.827	863.698	820.857	1294.19	708.336		2.44759	2.05895
ILMN_1813607	ANKRD30A	262.798	258.154	200.706	239.34	160.253	161.83		0.618259	0.844695
ILMN_1796059	ANKRD30A	806.04	786.73	618.354	738.036	425.065	368.042		0.497942	0.851591
ILMN_1710482	APLP2	138	202.127	230.224	222.077	296.567	251.408		1.61109	1.3298
ILMN_2404065	APP	534.208	543.69	792.436	606.535	843.956	945.844		1.66045	1.29787
ILMN_2404063	APP	492.999	451.449	658.799	497.827	782.72	801.861		1.67779	1.22466
ILMN_1723884	ARF4	391.361	388.929	404.314	436.516	501.486	964.587		1.87888	1.07759
ILMN_1719518	ARF4	1474.73	1552.19	1764.94	1727.92	1984.16	3511.36		1.81555	1.15393
ILMN_1678143	ARHGDIB	252.381	320.199	421.121	602.027	621.006	375.878		1.74104	1.78691
ILMN_1797310	ATP6V1D	905.931	966.662	906.358	912.153	1196.74	1635.3		1.51236	0.971119
ILMN_1703123	AXUD1	261.828	354.581	465.36	475.547	730.763	424.036		1.87343	1.52643
ILMN_1763638	BCAR3	505.881	486.526	490.158	672.958	858.094	722.128		1.59231	1.17202
ILMN_1804798	BEXL1	101.678	113.56	131.221	111.621	131.227	195.958		1.52011	1.12825
ILMN_1768534	BHLHB2	1221.43	1132.4	1441.93	1642.64	1825.33	1794.06		1.53766	1.31044
ILMN_2309245	BIN1	328.479	221.316	190.555	179.255	158.161	163.643		0.585315	0.672632
ILMN_1674160	BIN1	289.072	245.658	192.312	177.511	160.703	170.93		0.620186	0.691607
ILMN_1776181	BIRC3	485.734	459.479	335.726	211.481	233.239	339.647		0.606093	0.578925
ILMN_2349459	BIRC5	1401.35	1382.76	1276.34	1224	847.674	951.518		0.646237	0.898076
ILMN_2155172	BRIX1	811.788	737.103	578.565	638.405	560.608	468.436		0.664374	0.785703
ILMN_2226324	BRP44L	271.574	370.186	387.852	337.75	455.937	592.507		1.6337	1.13064
ILMN_2390310	C17ORF91	226.002	270.904	281.073	289.679	340.678	837.076		2.37018	1.14861
ILMN_1746819	C5	353.307	443.568	209.714	184.13	185.105	256.343		0.553974	0.494236
ILMN_1720998	CA12	1231.44	1615.18	1019.25	1042.2	1143.71	738.414		0.661179	0.724178
ILMN_1658835	CAV2	979.547	813.551	713.814	1059.17	556.394	532.06		0.607024	0.988785
ILMN_1720048	CCL2	1168.33	1475.06	1756.91	1146.95	1550.56	2515.35		1.53814	1.09853
ILMN_1712803	CCNB1	824.411	697.446	660.749	715.122	483.031	473.252		0.628366	0.904075
ILMN_1760247	CD70	314.591	266.261	484.915	412.042	657.22	349.553		1.73327	1.54421
ILMN_1779228	CDH2	2005.28	2158.58	3906.8	3625.74	4074.11	2820.43		1.65581	1.80903
ILMN_1784602	CDKN1A	2420.13	1733.4	2787.37	2335.4	3723.12	4574.58		1.99775	1.23335
ILMN_1666305	CDKN3	875.546	708.976	662.251	603.161	563.88	428.864		0.626526	0.798608
ILMN_1747016	CEP55	1319.38	1077.68	959.05	861.298	866.126	685.311		0.647225	0.759409
ILMN_2359945	CES1	221.651	143.583	283.727	362.35	292.351	298.222		1.61697	1.76894
ILMN_2044645	CGB1	250.278	221.31	374.109	700.591	459.16	344.86		1.70492	2.27889
ILMN_2163790	CGB5	180.189	150.175	226.058	430.606	315.472	207.632		1.58342	1.9877
ILMN_1732831	CHST7	349.525	469.701	609.337	549.459	798.161	698.867		1.82737	1.4145
ILMN_1790891	CKAP4	749.314	943.053	783.591	701.625	1114.83	1476.12		1.53096	0.877597
ILMN_2415179	CLSTN1	408.538	393.81	471.907	482.196	867.491	427.86		1.61445	1.18914
ILMN_2370208	CMTM3	260.477	319.328	387.185	324.917	455.033	527.637		1.69483	1.22817
ILMN_1770290	CNN2	932.888	1039.18	1127.7	1644.76	1868.23	1376.31		1.64525	1.40586
ILMN_1784532	COL22A1	96.6964	104.979	209.913	120.442	267.966	131.903		1.98273	1.63805
ILMN_1653028	COL4A1	1189.35	955.21	1927.61	2777.11	3337.04	2142.89		2.55527	2.19379
ILMN_1724994	COL4A2	167.445	161.441	234.064	270.293	300.482	212.888		1.56093	1.53353
ILMN_1742534	COL4A5	216.459	264.776	261.964	256.107	324.467	408.084		1.52223	1.07655
ILMN_1729117	COL5A2	597.357	670.921	829.142	834.92	1265.34	793.943		1.62368	1.31206
ILMN_1748707	CRELD2	334.507	350.853	403.668	415.58	496.13	540.015		1.51183	1.19535
ILMN_1706238	CSE1L	1885.1	1686.53	1531.53	1360.09	1246.21	1130.54		0.665453	0.809609
ILMN_1811921	CSRP1	729.154	909.826	1028.68	1409.96	1772.15	1461.88		1.9732	1.4879
ILMN_2115125	CTGF	456.264	607.141	637.599	761.812	1485.59	1143.15		2.472	1.31597
ILMN_1699829	CTGF	1244.77	1447.82	1636.54	2071.56	3993.07	3088.64		2.63008	1.37715
ILMN_1725090	CTHRC1	120.114	120.559	173.359	186.158	137.518	295.767		1.8003	1.4938
ILMN_1787897	CXCL1	130.75	109.254	152.497	122.165	148.085	224.852		1.55388	1.1444
ILMN_2171384	CXCL5	1064.39	733.655	322.348	906.952	658.03	532.301		0.662014	0.683687
ILMN_1745256	CXXC5	794.362	632.167	696.103	564.56	538.961	361.207		0.63102	0.883728
ILMN_3307729	CXXC5	1703.39	1151.21	1349.88	1315.04	1117.18	612.723		0.606004	0.933553
ILMN_2188264	CYR61	525.437	449.134	497.52	805.753	845.863	633.409		1.51787	1.33728
ILMN_1712419	DCDC2	253.784	187.554	149.071	167.749	151.915	142.082		0.666147	0.717861
ILMN_1665455	DCUN1D3	252.882	218.367	196.374	251.404	369.328	349.93		1.52628	0.950194
ILMN_1668507	DDAH1	217.63	170.301	176.43	341.443	332.106	273.104		1.5601	1.33496
ILMN_1815673	DKK3	296.143	306.54	446.35	790.748	709.312	421.084		1.87561	2.05265
ILMN_2398159	DKK3	343.268	366.244	573.011	933.595	988.986	540.491		2.15567	2.12344
ILMN_1792356	DPYSL4	373.059	407.153	656.534	622.605	797.202	683.689		1.89806	1.63948
ILMN_1706498	DSE	307.155	299.161	416.969	431.456	551.03	439.229		1.63324	1.39931
ILMN_1732688	DUT	479.199	584.995	568.389	556.114	375.696	311.321		0.645574	1.05667
ILMN_2374778	DUT	268.508	359.774	310.965	319.616	224.018	186.089		0.652744	1.00366
ILMN_2350634	EFEMP1	213.947	292.218	343.298	451.3	531.872	386.506		1.81438	1.56984
ILMN_2371055	EFNA1	338.93	244.7	364.586	432.876	448.757	459.929		1.55696	1.36638
ILMN_1769201	ELF3	473.076	282.736	170.74	145.648	152.811	215.926		0.487868	0.418605
ILMN_1678904	ENO3	251.387	372.933	392.598	448.576	526.669	441.146		1.55019	1.34734
ILMN_1704753	EPAS1	456.241	420.524	385.769	635.899	648.574	770.625		1.61868	1.16527
ILMN_2129927	EXT1	283.321	268.968	343.795	341.708	535.513	333.008		1.57258	1.2412
ILMN_2041190	F2RL1	601.781	895.618	719.917	1268.8	1291.32	1171.58		1.64478	1.32811
ILMN_1673113	F2RL1	371.495	541.499	490.234	816.864	716.852	769.409		1.6279	1.43166
ILMN_1708143	FAM127A	562.627	593.402	763.844	964.522	738.393	1087.78		1.57969	1.49509
ILMN_1719870	FAM72D	441.331	368.856	324.677	303.463	265.257	263.75		0.652945	0.775303
ILMN_1804117	FAM89B	201.231	209.739	249.963	264.114	396.74	274.227		1.63264	1.25089
ILMN_1703955	FBXO32	213.255	200.672	586.52	345.878	304.624	419.559		1.74954	2.25257
ILMN_1695290	FERMT2	847.647	972.242	1239.42	1340.58	1752.88	1280.14		1.6666	1.41767
ILMN_2355831	FHL2	1680.37	1455.17	2381.87	2423.44	2573.56	2538.5		1.63036	1.53253
ILMN_1668411	FHL2	725.344	703.149	1059.93	1080.6	1392.31	1084.82		1.73409	1.49846
ILMN_1665243	FKBP14	251.807	267.143	275.098	265.499	317.15	474.125		1.52476	1.04171
ILMN_1769615	FLRT2	314.377	315.12	558.935	449.52	630.404	392.493		1.62494	1.602
ILMN_2362581	FNDC3A	146.724	210.84	281.292	316.16	295.196	375.721		1.87636	1.6709
ILMN_1705111	FNDC3A	169.56	201.571	273.303	326.481	315.381	336.912		1.75758	1.6161
ILMN_1704418	FOXD1	352.411	394.741	615.715	606.925	800.601	488.485		1.72533	1.6364
ILMN_2330787	FRMD6	423.913	360.804	581.506	1101.29	816.978	514.388		1.69662	2.14447
ILMN_1769282	FRMD6	911.008	908.621	1364.4	1996.45	2017.3	1165.57		1.74918	1.847
ILMN_1808707	FSCN1	4218.55	4815.11	5633.99	5847.41	9690.09	6259.65		1.76559	1.27096
ILMN_1700081	FST	168.977	224.687	163.687	231.56	375.252	395.937		1.959	1.00402
ILMN_2309848	FXYD5	1798.58	2579.74	3189.63	3557.24	3576.26	3435.58		1.60149	1.54097
ILMN_1730575	GCLC	714.539	545.939	394.74	360.688	360.955	345.85		0.560743	0.599319
ILMN_1769245	GLIPR1	256.457	292.119	390.291	678.834	1184.1	1253.36		4.44324	1.94891
ILMN_1652631	GLIPR2	262.836	284.721	679.473	815.203	686.805	399.472		1.98386	2.72972
ILMN_2188722	GLS	343.231	359.528	435.437	352.74	640.367	643.189		1.82645	1.12155
ILMN_1764380	GLTP	1161.33	1150.23	1492.16	1500.89	1524.89	1984.86		1.51835	1.29482
ILMN_1749662	GPX1	691.699	762.275	916.484	1087.74	1355.71	1211.55		1.76568	1.37844
ILMN_1734353	GPX4	1226.44	1056.23	1228.68	1160.44	769.734	714.553		0.650241	1.04664
ILMN_2378952	GPX4	2365.57	1855.8	1978.02	2088.18	1214.41	1254.97		0.58497	0.963242
ILMN_1737157	GRAMD1A	828.008	1070.14	904.169	806.86	1351.69	1601.25		1.5557	0.901423
ILMN_1752965	GREM1	506.287	300.627	466.042	657.745	820.622	745.085		1.94037	1.3927
ILMN_1758398	GUK1	530.517	552.338	640.307	585.407	760.202	867.794		1.50343	1.13193
ILMN_2374159	HERPUD1	317.655	323.736	346.412	323.591	435.434	791.444		1.91284	1.04461
ILMN_2374164	HERPUD1	345.784	418.356	435.296	385.353	451.35	933.849		1.81276	1.07395
ILMN_1651496	HIST1H2BD	452.358	386.423	652.694	962.908	1010.6	576.297		1.89191	1.92613
ILMN_1758623	HIST1H2BD	255.716	243.036	356.462	428.815	518.025	306.582		1.65334	1.57448
ILMN_1796179	HIST1H2BK	1668.36	2429.3	2739.3	5035.62	4981.66	2477.79		1.82042	1.89741
ILMN_1659047	HIST2H2AA3	198.798	216.896	218.393	384.325	596.97	218.475		1.96165	1.44991
ILMN_1781942	HMMR	605.197	619.808	562.938	494.625	395.124	352.241		0.610091	0.863313
ILMN_1794492	HOXC6	395.377	403.437	444.033	551.607	586.3	731.32		1.64947	1.2464
ILMN_1865764		303.891	251.722	438.5	250.258	422.933	691.358		2.00552	1.23964
ILMN_1829845		428.474	559.336	294.185	280.305	250.888	324.342		0.582328	0.581579
ILMN_2348268	IFFO1	148.728	154.19	173.058	183.438	175.283	280.947		1.50612	1.17688
ILMN_1740319	IFI27L2	179.911	182.738	225.737	227.395	224.777	351.061		1.58787	1.24951
ILMN_2062468	IGFBP7	375.334	604.184	940.093	987.51	1727.78	1114.71		2.90193	1.96791
ILMN_1788107	IL11	184.937	240.979	409.669	945.096	530.491	343.542		2.05213	3.18082
ILMN_1778010	IL32	129.322	111.969	159.295	175.866	181.499	215.057		1.64348	1.38903
ILMN_2368530	IL32	261.887	181.481	350.261	381.943	456.574	475.906		2.10318	1.65146
ILMN_1666733	IL8	182.779	162.157	251.776	207.312	192.817	697.144		2.58008	1.33094
ILMN_2184373	IL8	359.388	249.29	639.943	474.752	460.491	1919.08		3.9094	1.83134
ILMN_2364376	ILK	1537.42	1586.5	1757.32	2181.46	2615.21	2167.18		1.53089	1.26084
ILMN_2358980	ILK	226.834	205.431	274.043	290.136	360.565	311.004		1.55361	1.30517
ILMN_1685714	INHBB	208.502	123.77	103.476	111.405	97.8155	109.118		0.622782	0.646702
ILMN_2081883	IQCK	637.575	495.201	442.228	399.478	407.268	301.501		0.625692	0.743047
ILMN_1811468	IRX3	267.84	430.404	444.993	502.79	535.862	560.144		1.56966	1.35738
ILMN_1665792	ITGA2	354.492	603.041	578.818	357.215	701.366	984.764		1.76091	0.977547
ILMN_1792679	ITGA5	197.094	231.151	234.057	253.125	554.729	683.175		2.89065	1.13762
ILMN_1764177	JARID2	175.712	160.01	240.736	266.055	305.383	234.077		1.60687	1.50956
ILMN_1733811	JUP	305.21	238.758	262.789	316.92	617.369	364.948		1.80584	1.0657
ILMN_1701173	KCNK6	128.392	125.948	126.542	136.155	173.939	311.108		1.90708	1.03286
ILMN_1722820	KDELR3	192.988	222.378	245.524	243.554	230.571	544.651		1.86636	1.17746
ILMN_1732609	KIAA1539	118.786	112.882	116.492	140.701	183.297	189.607		1.60965	1.11018
ILMN_1732967	KIAA1949	244.083	232.376	241.447	344.49	388.206	387.871		1.62884	1.22978
ILMN_1737406	KLF6	414.845	300.33	423.871	439.927	536.353	621.061		1.61836	1.20781
ILMN_1735014	KLF6	782.647	590.712	750.145	793.198	919.352	1184.37		1.53181	1.12377
ILMN_1705814	KRT80	1741.46	1464.65	1033.57	1359.73	1329.8	683.82		0.628056	0.74648
ILMN_1653824	LAMC2	213.186	184.537	203.428	190.497	362.057	246.725		1.53067	0.990449
ILMN_1701424	LAMC2	427.242	454.869	420.742	342.824	849.116	582.564		1.62301	0.865612
ILMN_2315979	LBH	505.274	557.362	735.859	808.143	1236.44	759.947		1.87871	1.45299
ILMN_1660794	LBH	209.21	239.165	259.565	319.509	421.593	257.407		1.51436	1.29149
ILMN_1662932	LCP1	93.4539	94.0569	96.7074	94.0608	176.849	351.122		2.81568	1.01737
ILMN_1723978	LGALS1	3520.16	3807.42	4908.13	5245.79	5965.36	6050.37		1.63979	1.38571
ILMN_1698019	LGMN	311.107	362.825	451.397	392.26	603.868	450.804		1.56495	1.25184
ILMN_1668194	LMTK3	509.293	263.132	210.643	275.258	195.385	198.386		0.509787	0.629061
ILMN_3203444	LOC100132535	284.601	379.683	451.925	423.203	482.794	526.022		1.51865	1.3174
ILMN_3214893	LOC100132761	360.937	431.372	489.691	311.616	743.168	448.652		1.50424	1.01136
ILMN_3287952	LOC100133800	661.132	666.684	549.926	640.448	475.998	380.311		0.6449	0.89649
ILMN_3237946	LOC100134134	485.645	823.178	1002.15	779.248	1496.41	899.062		1.83025	1.36107
ILMN_1726682	LOC146909	290.755	223.64	157.819	226.084	160.817	165.903		0.635153	0.746321
ILMN_3244176	LOC399959	127.191	141.019	130.891	166.069	165.512	249.612		1.54776	1.10719
ILMN_1763999	LOC441282	474.876	354.119	271.694	309.532	219.852	302.269		0.629824	0.701122
ILMN_3237991	LOC645166	375.087	513.296	575.213	678.62	855.458	607.848		1.64716	1.41136
ILMN_1742789	LPXN	147.127	190.543	209.833	188.465	371.108	275.721		1.91556	1.17955
ILMN_1737947	LSM5	2658.89	2402.07	2398.25	2753.96	2105.86	1076.73		0.628851	1.01803
ILMN_1805395	LTBP3	170.619	218.327	248.275	269.646	300.125	287.673		1.51126	1.3316
ILMN_1775522	MAGED1	1183.19	1584.57	1952.28	1573.63	1740.8	2484.47		1.52661	1.27392
ILMN_2306189	MAGED1	316.376	396.355	511.132	454.536	456.811	633.107		1.52922	1.35489
ILMN_2063168	MALL	657.646	1275.43	1112.18	1141.68	1496.83	1584.76		1.59414	1.16595
ILMN_1776188	MAP1LC3A	273.708	291.797	326.793	409.309	474.744	628.401		1.95073	1.30167
ILMN_1703244	MAP1LC3B	288.292	344.446	457.706	455.198	394.328	685.462		1.70654	1.44278
ILMN_1789991	2004-03-01	338.076	338.785	396.332	506.718	737.893	345.936		1.60126	1.33417
ILMN_2413898	MCM10	544.832	543.297	445.13	416.278	381.504	321.472		0.646041	0.791641
ILMN_1663195	MCM7	3880.29	4104.64	3110.18	3138.25	3096.53	2123.36		0.653718	0.782527
ILMN_2061435	MEG3	304.287	453.645	515.782	578.591	590.205	602.529		1.57367	1.44389
ILMN_1759097	MLLT11	1312.45	1215.07	1564.61	1956.73	1402.25	2598.82		1.583	1.3932
ILMN_1733937	MMD	565.129	484.846	367.765	353.512	275.195	405.377		0.648179	0.686948
ILMN_1685403	MMP7	1123.42	181.157	188.231	146.288	121.497	142.574		0.202419	0.25642
ILMN_2192072	MMP7	1288.51	207.643	214.44	148.419	121.297	156.287		0.185532	0.242528
ILMN_1658486	MRPL54	552.552	470.016	424.157	487.253	390.149	280.48		0.655829	0.891295
ILMN_1659895	MSN	1150.18	1150.87	1524.28	1519.78	2225.83	2336.29		1.98263	1.3229
ILMN_1691156	MT1A	1575.9	1856.31	2043.23	3745.83	4214.97	4328.4		2.48918	1.68669
ILMN_1718766	MT1F	159.101	157.523	167.396	279.777	225.756	304.5		1.67472	1.41231
ILMN_1715401	MT1G	121.405	124.349	128.301	196.999	223.102	212.957		1.77437	1.32368
ILMN_1775170	MT1X	555.186	567.134	596.058	639.853	1249.31	1352.19		2.31796	1.10121
ILMN_1686664	MT2A	2624.76	2907.48	3304.67	6317.78	6716.87	7189.76		2.51374	1.73934
ILMN_2136089	MTE	150.136	165.174	167.426	248.2	256.738	271.644		1.67575	1.31815
ILMN_2087702	MYH9	1759.49	1246.7	1719.18	1933.16	2692.5	1845.54		1.50956	1.21494
ILMN_1722872	MYH9	2661.49	2246.72	2816.62	2970.63	4246.22	3124.58		1.50173	1.1791
ILMN_2326071	MYL6	8588.04	7964.1	8848.76	10506.7	14659.2	12115.4		1.61759	1.16937
ILMN_1809013	MYL6	7378.25	6519.57	7650.2	8609.05	11800.8	10583.9		1.61066	1.16991
ILMN_1691476	MYLK	238.844	186.062	162.807	180.125	121.193	142.163		0.619797	0.807076
ILMN_2093027	MYO1B	1083.9	784.153	769.188	774.644	665.367	546.52		0.648743	0.826439
ILMN_1716547	NAGK	334.597	386.851	422.668	432.573	457.482	655.337		1.54248	1.18545
ILMN_1751444	NCAPG	550.154	508.426	451.772	458.794	392.2	311.754		0.664998	0.860177
ILMN_1800160	NR0B1	560.355	490.56	405.312	349.683	314.498	307.738		0.59209	0.718417
ILMN_1697220	NT5E	254.906	490.214	520.725	576.182	754.915	584.339		1.79737	1.47212
ILMN_1795963	OKL38	1065.56	893.379	678.578	756.442	597.959	698.546		0.66184	0.732549
ILMN_2381899	OPTN	226.821	211.571	285.143	256.76	286.797	404.033		1.57583	1.23612
ILMN_1795778	P4HA2	417.657	326.741	435.024	578.516	502.655	702.812		1.61938	1.36156
ILMN_1710495	PAPLN	168.035	158.894	119.802	104.881	97.5375	109.827		0.63428	0.687254
ILMN_1683023	PDGFC	177.114	208.149	360.332	335.709	376.497	216.237		1.53852	1.80667
ILMN_1690125	PDLIM7	265.737	305.036	313.126	440.076	517.199	347.313		1.51463	1.31962
ILMN_1771376	PEA15	1081.74	1135.71	1040.17	1793.31	1588.98	1973.6		1.60661	1.27781
ILMN_2383383	PIR	646.763	496.49	455.081	423.485	308.757	388.798		0.610149	0.768479
ILMN_1761247	PIR	1140.57	815.084	735.543	825.445	536.074	609.6		0.585826	0.798191
ILMN_1656057	PLAU	1189.98	1109.1	1377.97	985.865	1961.48	1932.33		1.69364	1.02817
ILMN_2408543	PLAUR	127.981	146.065	144.816	199.595	251.126	198.4		1.64033	1.25676
ILMN_2374340	PLAUR	182.555	202.555	225.838	304.962	435.275	349.185		2.03698	1.37831
ILMN_1811470	PLEK2	323.778	395.294	522.753	525.399	707.76	409.079		1.55316	1.45764
ILMN_1785265	PLS3	955.246	1004.38	917.792	914.908	1842.65	1169.38		1.53705	0.935231
ILMN_1703433	PLSCR3	886.074	1173.13	1550.13	1555.25	1496.18	2010.71		1.70304	1.50805
ILMN_1734276	PMEPA1	1660.99	1528.74	3025.64	2501.58	2715.3	2078.6		1.50292	1.73282
ILMN_2309156	PMEPA1	843.243	809.057	1692.48	1260.22	1337.23	1171.93		1.51859	1.78702
ILMN_1785646	PMP22	836.938	899.023	546.742	552.973	479.909	667.613		0.661031	0.633491
ILMN_2413158	PODXL	1228.19	1089.58	1912.76	2039.11	2123.21	1623.91		1.61669	1.70503
ILMN_1675656	PPFIBP2	440.479	445.618	227.502	172.86	192.392	234.142		0.481364	0.451827
ILMN_1785699	PTHLH	124.586	128.777	150.311	164.227	175.678	230.817		1.6044	1.24145
ILMN_2314169	PTHLH	242.421	236.7	292.608	301.596	343.664	487.985		1.73578	1.2402
ILMN_1810962	PTPRK	229.785	202.004	295.639	240.371	395.971	360.028		1.75085	1.24137
ILMN_1741727	QPCT	539.372	511.765	702.302	815.81	956.404	669.117		1.54644	1.44426
ILMN_1692219	RAB11FIP1	836.86	545.078	491.06	343.287	407.257	364.596		0.55853	0.603752
ILMN_2207363	RABAC1	428.471	571.683	757.641	645.214	687.937	1080.38		1.76804	1.40264
ILMN_1755364	RALA	783.313	866.164	907.872	921.151	917.815	2152.33		1.86128	1.10885
ILMN_1776519	RAP1GAP	527.615	482.824	313.687	327.363	309.704	254.639		0.558513	0.634427
ILMN_3224926	RBM47	708.131	529.065	479.825	497.836	364.867	373.966		0.597183	0.790224
ILMN_1753143	RHPN2	2472.57	1957.1	1779.57	1482.05	1592.57	822.29		0.545155	0.736311
ILMN_1759513	RND3	547.585	452.675	485.696	535.931	562.208	966.404		1.52821	1.02136
ILMN_2112811	RPL36A	293.155	237.715	209.05	231.5	182.41	164.238		0.65298	0.829865
ILMN_1750722	RPS7	1008.54	736.943	555.556	659.781	517.996	620.387		0.652189	0.696277
ILMN_1681983	RSPO3	739.48	505.542	430.498	526.616	351.359	313.612		0.534103	0.768752
ILMN_1750101	S100A11	953.404	919.882	1220.26	1063.62	1444.5	1464.51		1.55289	1.21918
ILMN_1765459	S100A13	486.218	524.374	581.874	656.551	870.889	746.898		1.60083	1.22545
ILMN_2407168	S100A13	542.357	538.159	649.166	754.039	1011.62	727.363		1.6094	1.29864
ILMN_1728049	S100A16	837.42	901.3	1160.64	1022.42	1349.23	1725.13		1.76817	1.25555
ILMN_2065773	SCG5	132.877	148.345	378.116	336.016	302.138	364.151		2.36926	2.53939
ILMN_1815308	SDC1	1185.92	1444.47	2183.82	2193.54	2678.5	2214.2		1.86007	1.66415
ILMN_1656386	SEC24D	141.161	158.017	178.084	161.087	178.6	299.716		1.59877	1.13368
ILMN_1706817	SERP1	217.428	258.982	282.905	312.883	280.361	453.232		1.53984	1.25058
ILMN_1744381	PAI1	1886.56	1448.76	2182.6	4854.28	3855	2570.72		1.92657	2.10981
ILMN_1655595	SERPINE2	3561.74	4232.65	7589.87	4225.76	6294.25	5673.53		1.53544	1.51592
ILMN_1702487	SGK	747.279	661.993	966.173	1093.79	1457.75	1004.09		1.74689	1.46172
ILMN_3229324	SGK1	511.31	450.564	666.975	718.223	930.935	640.803		1.63404	1.4401
ILMN_3305938	SGK1	554.422	497.25	685.325	819.963	982.411	718.302		1.61715	1.43133
ILMN_1810782	SH3KBP1	1721.01	1760.95	2292.44	1885.16	2464.41	3412.83		1.68791	1.19978
ILMN_1808501	SH3KBP1	1531.19	1605.51	2287.55	1525.77	2556	3386.39		1.89447	1.21571
ILMN_1743103	SH3PXD2A	143.47	145.25	266.121	155.336	234.157	235.893		1.62805	1.45975
ILMN_1721022	SHC1	1340.1	1469.83	1696.41	1944.72	2213.33	2295.99		1.60479	1.29581
ILMN_2364022	SLC16A3	237.539	394.92	501.16	534.177	767.847	603.05		2.16757	1.637
ILMN_1672662	SLC20A1	1364.91	1484.02	1450.54	1259.97	2342.23	2339.34		1.64327	0.951416
ILMN_1700831	SLC27A2	303.52	279.986	219.96	209.425	154.45	208.526		0.622059	0.73587
ILMN_1775708	SLC2A3	240.855	169.518	187.43	566.805	467.076	712.553		2.87453	1.83792
ILMN_1754247	SLC3A1	338.94	276.238	209.083	232.109	196.154	156.019		0.572474	0.717178
ILMN_2082585	SNAI2	153.557	147.736	299.839	314.808	312.278	187.79		1.65974	2.04003
ILMN_3238435	SNORA12	250.347	190.742	405.56	428.531	272.949	419.094		1.56894	1.89098
ILMN_2357134	SPHK1	94.546	99.5515	128.298	136.02	162.51	141.654		1.56707	1.36178
ILMN_1784948	SPOCD1	105.313	117.576	141.843	184.509	227.614	237.46		2.08658	1.46419
ILMN_1651354	SPP1	1585.93	1296.44	1854.6	2043.95	1962.65	3355.28		1.84498	1.35255
ILMN_2374449	SPP1	1103.93	913.611	1270.72	1375.81	1211.21	2535.42		1.85703	1.31176
ILMN_1709486	SRPX	160.973	262.897	548.72	407.216	460.757	447.018		2.14164	2.25526
ILMN_1809478	SSBP1	1977.04	1854.29	1865.25	2189.57	1594.67	879.61		0.645802	1.05834
ILMN_1758164	STC1	127.497	149.814	260.142	273.114	625.061	304.47		3.35195	1.92296
ILMN_1652379	SUCLG2	570.284	549.674	533.915	488.275	422.914	312.404		0.656558	0.912703
ILMN_1690761	SURF4	412.587	610.822	684.844	677.706	867.997	1036.11		1.86055	1.33138
ILMN_1742881	SYT1	129.421	130.996	180.632	151.559	214.151	218.73		1.66226	1.27561
ILMN_1778668	TAGLN	702.957	609.553	2123.85	2185.58	6489.69	6113.43		9.6023	3.28335
ILMN_2400935	TAGLN	179.794	152.159	398.049	387.379	1150.57	1002.36		6.48565	2.36609
ILMN_1749478	TCEAL3	208.255	240.82	245.926	279.704	344.265	357.728		1.5632	1.17047
ILMN_1734190	TCEAL3	340.078	456.46	444.635	469.531	638.806	736.588		1.72671	1.14768
ILMN_1750181	TESC	471.706	538.367	436.262	701.196	304.229	355.037		0.652692	1.12612
ILMN_1765574	TFAP2A	704.772	899.275	728.45	912.566	562.453	484.414		0.652641	1.02305
ILMN_2389876	TGFB1I1	272.53	333.97	381.25	472.029	592.381	373.865		1.59315	1.40689
ILMN_1663866	TGFBI	6922.31	7139.36	11310.2	12021.9	14154.3	7330.31		1.52788	1.65927
ILMN_1705750	TGM2	341.205	420.529	732.799	637.761	1072.27	907.054		2.59844	1.79926
ILMN_1686116	THBS1	372.428	289.883	551.643	564.4	661.751	484.77		1.73109	1.68507
ILMN_1721876	TIMP2	847.077	1036.89	1543.08	1631.8	2101.53	1144.87		1.72317	1.68521
ILMN_1793829	TMCO1	844.602	1960.98	2199.97	2031.32	2283.28	2244.79		1.61395	1.50817
ILMN_1685258	TMEM14B	2631.53	2196.8	2007.43	2005.8	1452.07	1593.76		0.630825	0.831184
ILMN_3244248	TMEM14D	2218.66	2066.7	1712.48	1513.33	1296.02	1411.42		0.63179	0.752752
ILMN_1792455	TMEM158	707.487	1419.23	1234.36	1937.13	3132.87	2483.29		2.64077	1.49126
ILMN_1779182	TMEM98	467.947	486.121	595.432	647.992	821.087	626.647		1.51743	1.30329
ILMN_1719759	TNC	97.6236	98.4619	108.597	111.404	152.892	151.654		1.55313	1.12197
ILMN_2145670	TNC	107.918	108.717	117.507	117.748	178.247	159.842		1.56064	1.08595
ILMN_1666022	TNFRSF10D	138.032	134.602	136.9	177.859	230.369	186.414		1.52873	1.15451
ILMN_1721128	TOMM34	887.258	1153.68	1249.73	989.67	1441.44	1682.23		1.53051	1.09724
ILMN_2358919	TP53I3	1227.07	1115.71	1875.42	1188.5	2005.02	1624.31		1.54915	1.30781
ILMN_2214197	TP53INP1	150.731	146.305	322.391	197.692	209.902	254.157		1.5623	1.75091
ILMN_1714108	TP53INP1	186.42	194.849	430.222	253.943	270.089	353.633		1.63591	1.79444
ILMN_1789196	TPM2	3267.4	3360.47	4919.54	5129.74	7664.55	6057.91		2.07042	1.51621
ILMN_1757604	TPM2	2209.01	1881.3	3034.28	2950.94	4559.41	3883.34		2.06409	1.46327
ILMN_1727479	TPRG1L	536.43	541.074	569.157	670.081	725.201	1269.98		1.85167	1.1501
ILMN_1656194	TSPAN10	145.773	156.143	197.972	198.025	202.826	285.452		1.61726	1.31161
ILMN_2130525	TSPAN13	126.462	135.735	129.668	143.583	137.203	372.43		1.9437	1.04216
ILMN_1675085	UBA6	391.836	423.645	661.852	432.685	604.784	683.063		1.57925	1.3422
ILMN_1687301	VCAN	188.017	202.323	334.501	216.801	455.892	353.582		2.07376	1.41236
ILMN_1795429	VCL	3850.23	4576.09	4120.96	5314.94	7237.77	5467.69		1.50783	1.11981
ILMN_2413527	VCL	273.034	317.587	289.851	357.186	609.342	421.192		1.74483	1.09552
ILMN_1781386	WIPI1	102.738	120.895	122.855	132.686	137.412	250.759		1.73575	1.14268
ILMN_1654262	ZMAT3	354.143	328.46	694.356	329.065	595.665	917.078		2.21614	1.49929
ILMN_1802888	ZNF185	244.309	336.046	381.92	388.998	513.673	419.859		1.60855	1.32836
ILMN_1779015	ZNF467	120.774	127.965	195.604	155.558	175.997	228.056		1.6244	1.41177
ILMN_1701875	ZYX	709.786	806.14	1150.77	1173.37	1833.94	1072.45		1.91724	1.53315
