# Supplementary material for: Autophagy acts through TRAF3 and RELB to regulate gene expression via antagonism of SMAD proteins
Source: Nat Commun. 2017 Nov 16;8:1537. doi: 10.1038/s41467-017-00859-z (PMC5691083; doi:10.1038/s41467-017-00859-z)
Supplement: Supplementary file 7 — Supplementary Data 2 [file 41467_2017_859_MOESM7_ESM.xlsx]

## Sheet: CALCOCO2 (NDP52)
GeneID	Symbol	Mean APSM	DN-Score	WDN-Score	Z-Score	Ratio	Weight Factor	Found in 1 or 2 technical replicates?	Individual APSM	Description
10241	CALCOCO2	86	2.19	2.80	5.65	6/34	2.14	2	86,85	Calcium-binding and coiled-coil domain-containing protein 2 (alias NDP52)
7175	TPR	2	2.00	1.90	5.71	1/34	1.00	2	1,2	Nucleoprotein TPR
8887	TAX1BP1	5	1.58	1.50	5.54	2/34	1.00	2	4,6	Isoform 2 of Tax1-binding protein 1
56897	WRNIP1	4	1.41	1.34	5.50	2/34	1.00	2	2,6	Isoform 2 of ATPase WRNIP1
23637	RABGAP1	4	1.41	1.34	5.50	2/34	1.00	2	2,5	Rab GTPase-activating protein 1
4967	OGDH	9	1.41	1.34	5.35	3/34	1.00	2	8,10	2-oxoglutarate dehydrogenase, mitochondrial
9755	TBKBP1	4	1.41	1.34	4.51	2/34	1.00	2	2,5	TANK-binding kinase 1-binding protein 1
23593	HEBP2	1	1.41	1.34	5.71	1/34	1.00	2	1,1	Isoform 2 of Heme-binding protein 2
64343	AZI2	15	1.37	1.30	4.97	4/34	1.00	2	15,15	5-azacytidine-induced protein 2
10616	RBCK1	3	1.22	1.16	5.33	2/34	1.00	2	4,1	RanBP-type and C3HC4-type zinc finger-containing protein 1
55149	MTPAP	20	1.05	1.00	2.70	6/34	1.00	2	20,19	Poly(A) RNA polymerase, mitochondrial
92259	MRPS36	2	1.00	0.95	5.03	2/34	1.00	2	1,2	28S ribosomal protein S36, mitochondrial
329	BIRC2	10	0.89	0.90	2.57	5/34	1.06	2	13,7	Baculoviral IAP repeat-containing protein 2
7185	TRAF1	2	0.67	0.89	0.36	3/34	1.41	2	3,1	TNF receptor-associated factor 1
29110	TBK1	24	0.69	0.79	2.65	10/34	1.20	2	22,25	Serine/threonine-protein kinase TBK1
3964	LGALS8	3	0.82	0.77	5.09	3/34	1.00	2	4,1	Isoform 2 of Galectin-8
7189	TRAF6	3	0.82	0.77	5.09	3/34	1.00	2	2,3	TNF receptor-associated factor 6
1738	DLD	6	0.69	0.74	5.39	5/34	1.12	2	5,7	Dihydrolipoyl dehydrogenase, mitochondrial
9577	BRE	2	0.50	0.67	0.61	4/34	1.00	2	1,2	Isoform 1 of BRCA1-A complex subunit BRE
7128	TNFAIP3	1	0.71	0.67	1.63	2/34	1.00	2	1,1	Tumor necrosis factor alpha-induced protein 3
55165	CEP55	2	0.67	0.63	4.59	3/34	1.00	2	1,2	Isoform 2 of Centrosomal protein of 55 kDa
10043	TOM1	2	0.67	0.63	4.59	3/34	1.00	2	1,2	Isoform 3 of Target of Myb protein 1
7187	TRAF3	2	0.67	0.63	4.59	3/34	1.00	2	1,2	TNF receptor-associated factor 3
1743	DLST	10	0.56	0.54	4.89	8/34	1.01	2	8,11	Dihydrolipoyllysine-residue succinyltransferase component of 2-oxoglutarate dehydrogenase complex, mitochondrial
55072	RNF31	5	0.53	0.50	4.60	6/34	1.00	2	3,6	RING finger protein 31
7126	TNFAIP1	2	0.40	0.50	0.90	5/34	1.31	2	3,1	BTB/POZ domain-containing adapter for CUL3-mediated RhoA degradation protein 2
4627	MYH9	37	0.32	0.48	0.21	27/34	1.44	2	35,39	Myosin-9
4628	MYH10	6	0.29	0.47	0.00	12/34	1.72	2	7,5	Isoform 2 of Myosin-10
144501	KRT80	1	0.47	0.45	0.89	3/34	1.00	2	1,1	Isoform 2 of Keratin, type II cytoskeletal 80
55971	BAIAP2L1	1	0.47	0.45	3.14	3/34	1.00	2	1,1	Brain-specific angiogenesis inhibitor 1-associated protein 2-like protein 1
140032	RPS4Y2	4	0.47	0.45	2.06	6/34	1.00	2	4,4	40S ribosomal protein S4, Y isoform 2
81858	SHARPIN	1	0.47	0.45	3.14	3/34	1.00	2	1,1	Isoform 2 of Sharpin
9643	MORF4L2	1	0.47	0.45	3.14	3/34	1.00	2	1,1	Mortality factor 4-like protein 2
32	ACACB	1	0.47	0.45	3.14	3/34	1.00	2	1,1	Isoform Short of Acetyl-CoA carboxylase 2
27429	HTRA2	4	0.47	0.45	3.18	6/34	1.00	2	5,2	Isoform 3 of Serine protease HTRA2, mitochondrial
5436	POLR2G	2	0.40	0.38	3.96	5/34	1.00	2	1,3	DNA-directed RNA polymerase II subunit RPB7
10551	AGR2	2	0.40	0.38	0.59	5/34	1.00	2	2,1	Anterior gradient protein 2 homolog
10342	TFG	90	0.39	0.37	1.72	34/34	1.00	2	81,98	Protein TFG
7186	TRAF2	7	0.37	0.35	4.58	10/34	1.00	2	6,8	Isoform 2 of TNF receptor-associated factor 2
5439	POLR2J	1	0.35	0.34	2.67	4/34	1.00	2	1,1	DNA-directed RNA polymerase II subunit RPB11-a
4131	MAP1B	6	0.12	0.32	-0.26	30/34	2.91	2	6,6	Microtubule-associated protein 1B
6472	SHMT2	5	0.20	0.32	0.94	16/34	1.73	2	5,5	Serine hydroxymethyltransferase, mitochondrial
10171	RCL1	2	0.33	0.32	3.73	6/34	1.00	2	1,2	RNA 3'-terminal phosphate cyclase-like protein
4646	MYO6	7	0.23	0.29	1.62	16/34	1.12	2	8,6	Uncharacterized protein
163	AP2B1	5	0.14	0.29	0.00	23/34	2.20	2	4,5	Isoform 2 of AP-2 complex subunit beta
79784	MYH14	3	0.15	0.28	0.16	16/34	1.93	2	2,3	Isoform 2 of Myosin-14
1173	AP2M1	3	0.14	0.27	0.09	17/34	2.12	2	2,3	Isoform 2 of AP-2 complex subunit mu
3980	LIG3	1	0.28	0.27	2.36	5/34	1.00	2	1,1	Isoform Beta of DNA ligase 3
3312	HSPA8	47	0.29	0.27	1.04	34/34	1.00	2	42,51	Heat shock cognate 71 kDa protein
79171	RBM42	2	0.29	0.27	3.52	7/34	1.00	2	1,2	Isoform 2 of RNA-binding protein 42
5318	PKP2	1	0.28	0.27	2.36	5/34	1.00	2	1,1	Isoform 1 of Plakophilin-2
6596	HLTF	1	0.28	0.27	2.36	5/34	1.00	2	1,1	Isoform 2 of Helicase-like transcription factor
8655	DYNLL1	2	0.29	0.27	3.05	7/34	1.00	2	2,1	Dynein light chain 1, cytoplasmic
4711	NDUFB5	2	0.29	0.27	3.52	7/34	1.00	2	2,1	NADH dehydrogenase [ubiquinone] 1 beta subcomplex subunit 5, mitochondrial
9919	SEC16A	26	0.28	0.26	1.57	26/34	1.00	2	22,30	Isoform 5 of Protein transport protein Sec16A
9733	SART3	15	0.26	0.25	1.38	21/34	1.00	2	16,13	Squamous cell carcinoma antigen recognized by T-cells 3
3309	HSPA5	39	0.26	0.25	0.94	34/34	1.00	2	38,40	78 kDa glucose-regulated protein
3306	HSPA2	19	0.27	0.25	1.32	23/34	1.00	2	16,22	Heat shock-related 70 kDa protein 2
84498	FAM120B	1	0.24	0.25	0.64	6/34	1.01	2	1,1	Constitutive coactivator of peroxisome proliferator-activated receptor gamma
83892	KCTD10	1	0.14	0.25	0.02	10/34	1.82	2	1,1	BTB/POZ domain-containing adapter for CUL3-mediated RhoA degradation protein 3
5108	PCM1	2	0.25	0.24	1.24	8/34	1.00	2	1,2	Uncharacterized protein
26986	PABPC1	34	0.25	0.24	1.21	33/34	1.00	2	37,31	Polyadenylate-binding protein 1
23112	TNRC6B	20	0.25	0.24	0.67	25/34	1.00	2	16,23	Isoform 2 of Trinucleotide repeat-containing gene 6B protein
11100	HNRNPUL1	38	0.26	0.24	1.17	34/34	1.00	2	37,39	Isoform 2 of Heterogeneous nuclear ribonucleoprotein U-like protein 1
4641	MYO1C	5	0.17	0.24	0.41	19/34	1.51	2	4,5	Isoform 2 of Myosin-Ic
218	ALDH3A1	2	0.25	0.24	2.95	8/34	1.00	2	1,2	Aldehyde dehydrogenase, dimeric NADP-preferring
2632	GBE1	2	0.25	0.24	3.41	8/34	1.00	2	1,2	1,4-alpha-glucan-branching enzyme
400506	C16orf88	2	0.25	0.24	2.08	8/34	1.00	2	2,1	Protein C16orf88
3396	ICT1	2	0.25	0.24	2.63	8/34	1.00	2	2,1	Peptidyl-tRNA hydrolase ICT1, mitochondrial
TRC2L_HUMAN	TRC2L_HUMAN	1	0.24	0.23	5.71	1/34	1.00	1	0,1	Putative short transient receptor potential channel 2-like protein
285971	ZNF775	1	0.24	0.23	5.71	1/34	1.00	1	0,1	Zinc finger protein 775
1660	DHX9	31	0.25	0.23	1.17	32/34	1.00	2	32,29	ATP-dependent RNA helicase A
2934	GSN	4	0.19	0.23	0.80	15/34	1.29	2	3,4	Isoform 2 of Gelsolin
85397	RGS8	1	0.24	0.23	5.71	1/34	1.00	1	1,0	Isoform 2 of Regulator of G-protein signaling 8
327	APEH	1	0.24	0.23	5.71	1/34	1.00	1	1,0	Acylamino-acid-releasing enzyme
8653	DDX3Y	13	0.24	0.23	0.61	21/34	1.00	2	15,11	ATP-dependent RNA helicase DDX3Y
23325	KIAA1033	1	0.24	0.23	5.71	1/34	1.00	1	0,1	WASH complex subunit 7
9863	MAGI2	1	0.24	0.23	5.71	1/34	1.00	1	1,0	Isoform 2 of Membrane-associated guanylate kinase, WW and PDZ domain-containing protein 2
25939	SAMHD1	1	0.24	0.23	5.71	1/34	1.00	1	2,0	Isoform 2 of SAM domain and HD domain-containing protein 1
92610	TIFA	1	0.24	0.23	5.71	1/34	1.00	1	0,1	TRAF-interacting protein with FHA domain-containing protein A
79759	ZNF668	1	0.24	0.23	5.71	1/34	1.00	1	0,1	Zinc finger protein 668
10529	NEBL	1	0.24	0.23	5.71	1/34	1.00	1	1,0	Nebulette
59349	KLHL12	5	0.24	0.23	4.20	13/34	1.00	2	6,4	Kelch-like protein 12
10134	BCAP31	1	0.24	0.23	5.71	1/34	1.00	1	1,0	B-cell receptor-associated protein 31
117154	DACH2	1	0.24	0.23	5.71	1/34	1.00	1	0,1	Isoform 2 of Dachshund homolog 2
7270	TTF1	1	0.24	0.23	5.71	1/34	1.00	1	0,1	Transcription termination factor 1
54497	HEATR5B	1	0.24	0.23	5.71	1/34	1.00	1	1,0	Isoform 2 of HEAT repeat-containing protein 5B
30819	KCNIP2	1	0.24	0.23	5.71	1/34	1.00	1	0,1	Isoform 2 of Kv channel-interacting protein 2
65981	CAPRIN2	1	0.24	0.23	5.71	1/34	1.00	1	1,0	Isoform 2 of Caprin-2
3043	HBB	1	0.24	0.23	5.71	1/34	1.00	1	2,0	Hemoglobin subunit beta
168400	DDX53	1	0.24	0.23	5.71	1/34	1.00	1	0,1	Probable ATP-dependent RNA helicase DDX53
51430	C1orf9	1	0.24	0.23	5.71	1/34	1.00	1	1,0	Isoform 2 of Protein osteopotentia homolog
169166	SNX31	1	0.24	0.23	5.71	1/34	1.00	1	1,0	Uncharacterized protein
3655	ITGA6	1	0.24	0.23	5.71	1/34	1.00	1	0,1	Isoform Alpha-6X1A of Integrin alpha-6
81603	TRIM8	1	0.24	0.23	5.71	1/34	1.00	1	1,0	Probable E3 ubiquitin-protein ligase TRIM8
121274	ZNF641	1	0.24	0.23	5.71	1/34	1.00	1	1,0	Zinc finger protein 641
10795	ZNF268	1	0.24	0.23	5.71	1/34	1.00	1	1,0	Uncharacterized protein
29982	NRBF2	1	0.24	0.23	5.71	1/34	1.00	1	0,1	Isoform 2 of Nuclear receptor-binding factor 2
89932	PAPLN	1	0.24	0.23	5.71	1/34	1.00	1	0,1	Isoform 2 of Papilin
2564	GABRE	1	0.24	0.23	5.71	1/34	1.00	1	1,0	Gamma-aminobutyric acid receptor subunit epsilon
91862	MARVELD3	1	0.24	0.23	5.71	1/34	1.00	1	1,0	MARVEL domain-containing protein 3
112950	MED8	1	0.24	0.23	5.71	1/34	1.00	1	1,0	Isoform 2 of Mediator of RNA polymerase II transcription subunit 8
79874	RABEP2	1	0.24	0.23	5.71	1/34	1.00	1	0,1	Isoform 2 of Rab GTPase-binding effector protein 2
3338	DNAJC4	1	0.24	0.23	5.71	1/34	1.00	1	1,0	DnaJ homolog subfamily C member 4
9208	LRRFIP1	1	0.24	0.23	5.71	1/34	1.00	1	1,0	Uncharacterized protein
163126	EID2	1	0.24	0.23	5.71	1/34	1.00	1	1,0	Isoform 2 of EP300-interacting inhibitor of differentiation 2
23588	KLHDC2	1	0.24	0.23	5.71	1/34	1.00	1	0,1	Isoform 2 of Kelch domain-containing protein 2
2521	FUS	31	0.23	0.22	1.23	34/34	1.00	2	25,36	Isoform Short of RNA-binding protein FUS
6626	SNRPA	14	0.23	0.22	1.44	23/34	1.00	2	13,14	U1 small nuclear ribonucleoprotein A
8452	CUL3	4	0.24	0.22	1.48	12/34	1.00	2	2,6	Isoform 2 of Cullin-3
677	ZFP36L1	1	0.24	0.22	2.10	6/34	1.00	2	1,1	Zinc finger protein 36, C3H1 type-like 1
27327	TNRC6A	11	0.23	0.22	0.86	20/34	1.00	2	6,15	Isoform 6 of Trinucleotide repeat-containing gene 6A protein
23212	RRS1	1	0.24	0.22	2.10	6/34	1.00	2	1,1	Ribosome biogenesis regulatory protein homolog
8531	CSDA	15	0.22	0.21	1.01	25/34	1.00	2	10,19	DNA-binding protein A
5976	UPF1	14	0.22	0.21	1.24	24/34	1.00	2	12,15	Isoform 2 of Regulator of nonsense transcripts 1
55131	RBM28	4	0.22	0.21	1.71	13/34	1.00	2	3,4	RNA-binding protein 28
8761	PABPC4	23	0.22	0.21	1.21	31/34	1.00	2	23,22	Isoform 2 of Polyadenylate-binding protein 4
3848	KRT1	28	0.22	0.21	0.71	34/34	1.00	2	30,25	Keratin, type II cytoskeletal 1
6598	SMARCB1	2	0.22	0.21	2.31	9/34	1.00	2	1,2	Isoform B of SWI/SNF-related matrix-associated actin-dependent regulator of chromatin subfamily B member 1
4691	NCL	29	0.22	0.21	1.26	34/34	1.00	2	29,29	Nucleolin
3609	ILF3	23	0.23	0.21	1.36	30/34	1.00	2	22,24	Interleukin enhancer-binding factor 3
3857	KRT9	25	0.22	0.21	0.92	32/34	1.00	2	23,27	Keratin, type I cytoskeletal 9
84305	WIBG	2	0.22	0.21	1.81	9/34	1.00	2	2,1	Isoform 2 of Partner of Y14 and mago
4670	HNRNPM	27	0.22	0.21	1.59	34/34	1.00	2	26,27	Isoform 2 of Heterogeneous nuclear ribonucleoprotein M
64763	ZNF574	3	0.22	0.21	2.13	11/34	1.00	2	2,3	Isoform 2 of Zinc finger protein 574
K0802_HUMAN	K0802_HUMAN	2	0.22	0.21	2.19	9/34	1.00	2	2,1	Uncharacterized protein KIAA0802
8289	ARID1A	12	0.21	0.20	0.85	23/34	1.00	2	9,15	AT-rich interactive domain-containing protein 1A
3304	HSPA1B	25	0.21	0.20	1.49	34/34	1.00	2	27,22	Heat shock 70 kDa protein 1A/1B
54431	DNAJC10	21	0.21	0.20	1.80	31/34	1.00	2	21,21	DnaJ homolog subfamily C member 10
27161	EIF2C2	11	0.21	0.20	0.89	22/34	1.00	2	8,14	Isoform 2 of Protein argonaute-2
3181	HNRNPA2B1	25	0.21	0.20	1.15	34/34	1.00	2	23,27	Isoform A2 of Heterogeneous nuclear ribonucleoproteins A2/B1
5351	PLOD1	12	0.21	0.20	1.95	23/34	1.00	2	13,10	Procollagen-lysine,2-oxoglutarate 5-dioxygenase 1
9530	BAG4	12	0.21	0.20	1.90	23/34	1.00	2	10,13	BAG family molecular chaperone regulator 4
56243	KIAA1217	7	0.21	0.20	1.69	18/34	1.00	2	7,6	Isoform 3 of Sickle tail protein homolog
8021	NUP214	5	0.21	0.20	2.92	15/34	1.00	2	5,4	Isoform 2 of Nuclear pore complex protein Nup214
6741	SSB	13	0.20	0.19	1.52	26/34	1.00	2	10,15	Lupus La protein
26523	EIF2C1	8	0.20	0.19	1.31	20/34	1.00	2	9,6	Protein argonaute-1
3069	HDLBP	5	0.20	0.19	0.93	16/34	1.00	2	2,7	Vigilin
23367	LARP1	12	0.20	0.19	1.00	25/34	1.00	2	10,14	La-related protein 1
3608	ILF2	11	0.20	0.19	1.31	24/34	1.00	2	7,15	Interleukin enhancer-binding factor 2
84545	MRPL43	1	0.20	0.19	1.93	7/34	1.00	2	1,1	Isoform 2 of 39S ribosomal protein L43, mitochondrial
1645	AKR1C1	2	0.20	0.19	2.32	3/34	1.00	1	0,4	Aldo-keto reductase family 1 member C1
56616	DIABLO	2	0.20	0.19	1.93	3/34	1.00	1	3,0	Isoform 2 of Diablo homolog, mitochondrial
285175	UNC80	1	0.20	0.19	1.93	7/34	1.00	2	1,1	Isoform 2 of Protein unc-80 homolog
84946	LTV1	2	0.20	0.19	3.17	10/34	1.00	2	1,2	Protein LTV1 homolog
100526737	RBM14-RBM4	1	0.20	0.19	1.13	7/34	1.00	2	1,1	Transcriptional coactivator CoAZ
51065	RPS27L	2	0.20	0.19	1.47	10/34	1.00	2	2,1	40S ribosomal protein S27-like
140890	SREK1	1	0.20	0.19	1.13	7/34	1.00	2	1,1	Isoform 2 of Splicing regulatory glutamine/lysine-rich protein 1
29086	BABAM1	1	0.17	0.19	0.01	2/34	1.00	1	1,0	Isoform 3 of BRISC and BRCA1-A complex member 1
4904	YBX1	21	0.19	0.18	0.71	34/34	1.00	2	16,26	Nuclease-sensitive element-binding protein 1
10492	SYNCRIP	16	0.19	0.18	0.94	29/34	1.00	2	16,15	Heterogeneous nuclear ribonucleoprotein Q
2317	FLNB	18	0.19	0.18	0.94	31/34	1.00	2	18,17	Isoform 2 of Filamin-B
5430	POLR2A	9	0.19	0.18	2.28	22/34	1.00	2	7,11	DNA-directed RNA polymerase II subunit RPB1
192669	EIF2C3	4	0.19	0.18	1.12	15/34	1.00	2	2,5	Protein argonaute-3
22872	SEC31A	7	0.19	0.18	2.48	20/34	1.00	2	5,8	Isoform 4 of Protein transport protein Sec31A
55720	TSR1	3	0.19	0.18	1.75	13/34	1.00	2	2,4	Pre-rRNA-processing protein TSR1 homolog
10155	TRIM28	9	0.18	0.18	1.74	23/34	1.00	2	8,9	Transcription intermediary factor 1-beta
10376	TUBA1B	11	0.19	0.18	0.08	25/34	1.00	2	12,10	Tubulin alpha-1B chain
5209	PFKFB3	3	0.19	0.18	3.16	13/34	1.00	2	4,2	Isoform 2 of 6-phosphofructo-2-kinase/fructose-2,6-biphosphatase 3
55015	PRPF39	7	0.19	0.18	1.48	20/34	1.00	2	8,5	Pre-mRNA-processing factor 39
7280	TUBB2A	10	0.19	0.18	-0.38	24/34	1.00	2	10,10	Tubulin beta-2A chain
170506	DHX36	9	0.18	0.18	0.68	23/34	1.00	2	9,8	Probable ATP-dependent RNA helicase DHX36
25929	GEMIN5	3	0.19	0.18	2.07	13/34	1.00	2	2,3	Gem-associated protein 5
8239	USP9X	2	0.11	0.18	-0.02	18/34	1.69	2	2,1	Isoform 2 of Probable ubiquitin carboxyl-terminal hydrolase FAF-X
9342	SNAP29	1	0.17	0.18	0.40	2/34	1.16	1	0,1	Synaptosomal-associated protein 29
84142	FAM175A	1	0.17	0.18	0.34	2/34	1.18	1	0,1	BRCA1-A complex subunit Abraxas
3305	HSPA1L	14	0.18	0.17	1.35	30/34	1.00	2	16,12	Heat shock 70 kDa protein 1-like
70	ACTC1	8	0.18	0.17	0.32	22/34	1.00	2	7,9	Actin, alpha cardiac muscle 1
1266	CNN3	2	0.18	0.17	1.94	11/34	1.00	2	2,1	Calponin-3
790	CAD	14	0.18	0.17	0.48	30/34	1.00	2	10,18	CAD protein
1655	DDX5	17	0.18	0.17	1.13	32/34	1.00	2	21,13	Probable ATP-dependent RNA helicase DDX5
3868	KRT16	5	0.18	0.17	0.28	18/34	1.00	2	4,6	Keratin, type I cytoskeletal 16
1994	ELAVL1	8	0.17	0.17	1.21	23/34	1.00	2	8,8	ELAV-like protein 1
9698	PUM1	1	0.18	0.17	1.06	8/34	1.00	2	1,1	Isoform 2 of Pumilio homolog 1
7277	TUBA4A	8	0.17	0.17	-0.14	23/34	1.00	2	10,6	Tubulin alpha-4A chain
9188	DDX21	16	0.18	0.17	1.36	32/34	1.00	2	13,19	Nucleolar RNA helicase 2
6125	RPL5	15	0.18	0.17	2.08	31/34	1.00	2	13,16	60S ribosomal protein L5
10940	POP1	3	0.18	0.17	1.34	14/34	1.00	2	2,3	Ribonucleases P/MRP protein subunit POP1
55596	ZCCHC8	3	0.18	0.17	1.49	14/34	1.00	2	3,2	Isoform 2 of Zinc finger CCHC domain-containing protein 8
8731	RNMT	6	0.18	0.17	1.56	19/34	1.00	2	5,6	Isoform 2 of mRNA cap guanine-N7 methyltransferase
26273	FBXO3	1	0.18	0.17	1.45	8/34	1.00	2	1,1	Isoform 2 of F-box only protein 3
56252	YLPM1	2	0.18	0.17	1.53	11/34	1.00	2	1,2	Isoform 3 of YLP motif-containing protein 1
23016	EXOSC7	2	0.18	0.17	2.41	11/34	1.00	2	2,1	Exosome complex component RRP42
84295	PHF6	2	0.18	0.17	2.70	11/34	1.00	2	2,1	PHD finger protein 6
7259	TSPYL1	2	0.18	0.17	2.08	11/34	1.00	2	2,1	Testis-specific Y-encoded-like protein 1
57805	KIAA1967	8	0.17	0.16	0.99	24/34	1.00	2	8,8	Protein KIAA1967
84105	PCBD2	1	0.17	0.16	3.92	2/34	1.00	1	1,0	Pterin-4-alpha-carbinolamine dehydratase 2
8237	USP11	1	0.17	0.16	3.92	2/34	1.00	1	2,0	Ubiquitin carboxyl-terminal hydrolase 11
6188	RPS3	15	0.17	0.16	1.29	33/34	1.00	2	15,15	40S ribosomal protein S3
2316	FLNA	17	0.17	0.16	0.01	34/34	1.00	2	17,17	Isoform 2 of Filamin-A
10236	HNRNPR	11	0.17	0.16	1.46	27/34	1.00	2	8,13	Heterogeneous nuclear ribonucleoprotein R
54472	TOLLIP	1	0.17	0.16	3.92	2/34	1.00	1	0,2	Toll-interacting protein
3313	HSPA9	17	0.17	0.16	0.55	34/34	1.00	2	18,16	Stress-70 protein, mitochondrial
1654	DDX3X	15	0.17	0.16	0.39	33/34	1.00	2	17,13	ATP-dependent RNA helicase DDX3X
10521	DDX17	15	0.17	0.16	1.49	32/34	1.00	2	19,10	Isoform 4 of Probable ATP-dependent RNA helicase DDX17
9961	MVP	16	0.17	0.16	0.96	33/34	1.00	2	14,17	Major vault protein
117246	FTSJ3	4	0.17	0.16	1.58	17/34	1.00	2	3,5	Putative rRNA methyltransferase 3
3858	KRT10	16	0.17	0.16	0.24	34/34	1.00	2	18,14	Keratin, type I cytoskeletal 10
221184	CPNE2	6	0.17	0.16	2.10	20/34	1.00	2	5,6	Copine-2
55922	NKRF	6	0.17	0.16	1.44	21/34	1.00	2	5,7	NF-kappa-B-repressing factor
4134	MAP4	2	0.17	0.16	2.04	12/34	1.00	2	1,2	Isoform 6 of Microtubule-associated protein 4
29078	NDUFAF4	1	0.17	0.16	3.92	2/34	1.00	1	1,0	NADH dehydrogenase [ubiquinone] 1 alpha subcomplex assembly factor 4
7073	TIAL1	6	0.17	0.16	0.76	21/34	1.00	2	3,8	Nucleolysin TIAR
3840	KPNA4	2	0.17	0.16	2.36	12/34	1.00	2	1,2	Importin subunit alpha-4
23524	SRRM2	11	0.17	0.16	0.84	27/34	1.00	2	11,11	Serine/arginine repetitive matrix protein 2
10383	TUBB2C	13	0.17	0.16	-0.47	31/34	1.00	2	12,13	Tubulin beta-2C chain
10381	TUBB3	10	0.17	0.16	-0.41	27/34	1.00	2	8,11	Tubulin beta-3 chain
11328	FKBP9	1	0.17	0.16	3.92	2/34	1.00	1	0,1	Peptidyl-prolyl cis-trans isomerase FKBP9
51214	IGF2AS	1	0.17	0.16	3.92	2/34	1.00	1	0,1	Putative insulin-like growth factor 2 antisense gene protein
8895	CPNE3	2	0.17	0.16	0.71	12/34	1.00	2	2,2	Copine-3
10644	IGF2BP2	7	0.17	0.16	0.88	22/34	1.00	2	8,5	Isoform 2 of Insulin-like growth factor 2 mRNA-binding protein 2
9632	SEC24C	6	0.17	0.16	2.87	21/34	1.00	2	6,6	Protein transport protein Sec24C
266971	PIPSL	1	0.17	0.16	3.92	2/34	1.00	1	1,0	Putative PIP5K1A and PSMD4-like protein
6625	SNRNP70	14	0.17	0.16	1.19	32/34	1.00	2	12,15	Isoform 2 of U1 small nuclear ribonucleoprotein 70 kDa
22803	XRN2	13	0.17	0.16	1.58	30/34	1.00	2	9,17	Isoform 2 of 5'-3' exoribonuclease 2
23636	NUP62	2	0.17	0.16	2.61	12/34	1.00	2	3,1	Nuclear pore glycoprotein p62
6628	SNRPB	12	0.17	0.16	1.17	29/34	1.00	2	11,12	Isoform SM-B of Small nuclear ribonucleoprotein-associated proteins B and B'
92799	SHKBP1	1	0.17	0.16	3.92	2/34	1.00	1	1,0	Isoform 2 of SH3KBP1-binding protein 1
93621	MRFAP1	1	0.17	0.16	3.92	2/34	1.00	1	1,0	MORF4 family-associated protein 1
55362	TMEM63B	1	0.17	0.16	3.92	2/34	1.00	1	1,0	Isoform 2 of Transmembrane protein 63B
5184	PEPD	1	0.17	0.16	3.92	2/34	1.00	1	0,1	Xaa-Pro dipeptidase
6015	RING1	1	0.17	0.16	3.92	2/34	1.00	1	0,1	Isoform 2 of E3 ubiquitin-protein ligase RING1
27252	KLHL20	1	0.17	0.16	3.92	2/34	1.00	1	0,1	Kelch-like protein 20
10298	PAK4	1	0.17	0.16	3.92	2/34	1.00	1	0,1	Serine/threonine-protein kinase PAK 4
93343	FAM125A	1	0.17	0.16	3.92	2/34	1.00	1	0,1	Isoform 3 of Multivesicular body subunit 12A
64320	RNF25	1	0.17	0.16	3.92	2/34	1.00	1	0,1	E3 ubiquitin-protein ligase RNF25
4116	MAGOH	1	0.17	0.16	3.92	2/34	1.00	1	1,0	Protein mago nashi homolog
5965	RECQL	1	0.17	0.16	3.92	2/34	1.00	1	0,1	ATP-dependent DNA helicase Q1
6183	MRPS12	1	0.17	0.16	3.92	2/34	1.00	1	1,0	28S ribosomal protein S12, mitochondrial
9902	MRC2	1	0.17	0.16	3.92	2/34	1.00	1	0,1	C-type mannose receptor 2
6717	SRI	1	0.17	0.16	3.92	2/34	1.00	1	1,0	Sorcin
9147	NEMF	1	0.17	0.16	3.92	2/34	1.00	1	0,1	Isoform 3 of Nuclear export mediator factor NEMF
55661	DDX27	1	0.17	0.16	3.92	2/34	1.00	1	1,0	Probable ATP-dependent RNA helicase DDX27
51574	LARP7	3	0.15	0.15	2.00	16/34	1.00	2	1,4	La-related protein 7
23196	FAM120A	10	0.16	0.15	0.99	28/34	1.00	2	10,10	Isoform D of Constitutive coactivator of PPAR-gamma-like protein 1
3192	HNRNPU	15	0.16	0.15	1.26	34/34	1.00	2	15,14	Isoform Short of Heterogeneous nuclear ribonucleoprotein U
124245	ZC3H18	3	0.16	0.15	1.69	15/34	1.00	2	3,2	Zinc finger CCCH domain-containing protein 18
8570	KHSRP	7	0.16	0.15	1.35	24/34	1.00	2	6,7	Isoform 2 of Far upstream element-binding protein 2
25940	FAM98A	5	0.16	0.15	0.91	20/34	1.00	2	4,5	Isoform 2 of Protein FAM98A
283742	FAM98B	3	0.15	0.15	1.32	16/34	1.00	2	2,4	Protein FAM98B
6426	SRSF1	7	0.16	0.15	1.34	24/34	1.00	2	6,7	Isoform ASF-2 of Serine/arginine-rich splicing factor 1
3184	HNRNPD	8	0.15	0.15	0.78	26/34	1.00	2	9,6	Isoform 3 of Heterogeneous nuclear ribonucleoprotein D0
9987	HNRPDL	6	0.16	0.15	1.19	22/34	1.00	2	6,5	Isoform 2 of Heterogeneous nuclear ribonucleoprotein D-like
22907	DHX30	6	0.16	0.15	0.74	22/34	1.00	2	7,4	Isoform 2 of Putative ATP-dependent RNA helicase DHX30
103910	MYL12B	3	0.16	0.15	0.74	15/34	1.00	2	4,1	Myosin regulatory light chain 12B
203068	TUBB	14	0.16	0.15	-0.72	34/34	1.00	2	12,15	Tubulin beta chain
667	DST	1	0.16	0.15	1.15	9/34	1.00	2	1,1	Isoform 2 of Dystonin
3183	HNRNPC	12	0.16	0.15	1.70	31/34	1.00	2	10,13	Isoform C1 of Heterogeneous nuclear ribonucleoproteins C1/C2
51493	C22orf28	8	0.15	0.15	1.29	26/34	1.00	2	6,10	tRNA-splicing ligase RtcB homolog
10484	SEC23A	8	0.15	0.15	1.85	26/34	1.00	2	7,8	Protein transport protein Sec23A
3189	HNRNPH3	13	0.15	0.15	1.05	33/34	1.00	2	12,14	Heterogeneous nuclear ribonucleoprotein H3
3187	HNRNPH1	12	0.16	0.15	0.56	31/34	1.00	2	11,12	Heterogeneous nuclear ribonucleoprotein H
3188	HNRNPH2	7	0.16	0.15	0.79	24/34	1.00	2	9,5	Heterogeneous nuclear ribonucleoprotein H2
3190	HNRNPK	15	0.16	0.15	1.42	34/34	1.00	2	11,18	Isoform 3 of Heterogeneous nuclear ribonucleoprotein K
51154	MRTO4	2	0.15	0.15	1.76	13/34	1.00	2	2,1	mRNA turnover protein 4 homolog
11103	KRR1	1	0.16	0.15	1.06	9/34	1.00	2	1,1	KRR1 small subunit processome component homolog
4927	NUP88	3	0.16	0.15	1.89	15/34	1.00	2	4,2	Nuclear pore complex protein Nup88
8644	AKR1C3	2	0.15	0.15	1.00	13/34	1.00	2	1,2	Aldo-keto reductase family 1 member C3
11051	NUDT21	3	0.15	0.15	1.99	16/34	1.00	2	2,3	Cleavage and polyadenylation specificity factor subunit 5
8857	FCGBP	2	0.15	0.15	0.43	13/34	1.00	2	1,3	IgGFc-binding protein
6709	SPTAN1	4	0.14	0.15	0.56	20/34	1.00	2	3,4	Isoform 2 of Spectrin alpha chain, brain
4666	NACA	1	0.16	0.15	1.64	9/34	1.00	2	1,1	Nascent polypeptide-associated complex subunit alpha
1665	DHX15	10	0.15	0.15	0.68	29/34	1.00	2	11,8	Putative pre-mRNA-splicing factor ATP-dependent RNA helicase DHX15
65244	SPATS2	3	0.16	0.15	0.77	15/34	1.00	2	4,1	Spermatogenesis-associated serine-rich protein 2
160	AP2A1	1	0.08	0.15	-0.23	17/34	1.95	2	1,1	Isoform B of AP-2 complex subunit alpha-1
51388	NIP7	2	0.15	0.15	1.82	13/34	1.00	2	2,1	60S ribosome subunit biogenesis protein NIP7 homolog
1477	CSTF1	2	0.15	0.15	2.00	13/34	1.00	2	2,1	Cleavage stimulation factor subunit 1
9053	MAP7	1	0.16	0.15	0.94	9/34	1.00	2	1,1	Isoform 3 of Ensconsin
6624	FSCN1	1	0.16	0.15	1.15	9/34	1.00	2	1,1	Fascin
2130	EWSR1	12	0.14	0.14	0.87	34/34	1.00	2	12,11	RNA-binding protein EWS
51329	ARL6IP4	2	0.14	0.14	1.92	14/34	1.00	2	2,1	Isoform 2 of ADP-ribosylation factor-like protein 6-interacting protein 4
6122	RPL3	12	0.15	0.14	1.35	33/34	1.00	2	11,12	60S ribosomal protein L3
7314	UBB	12	0.15	0.14	3.00	33/34	1.00	2	12,11	Polyubiquitin-B
23517	SKIV2L2	4	0.15	0.14	1.48	19/34	1.00	2	4,4	Superkiller viralicidic activity 2-like 2
3892	KRT86	2	0.14	0.14	0.38	14/34	1.00	2	2,2	Keratin, type II cuticular Hb6
3849	KRT2	12	0.14	0.14	-0.15	34/34	1.00	2	9,15	Keratin, type II cytoskeletal 2 epidermal
302	ANXA2	12	0.14	0.14	0.56	34/34	1.00	2	12,11	Isoform 2 of Annexin A2
7072	TIA1	6	0.14	0.14	1.19	24/34	1.00	2	5,6	Nucleolysin TIA-1 isoform p40
47	ACLY	6	0.14	0.14	1.25	24/34	1.00	2	5,6	ATP-citrate synthase
6601	SMARCC2	3	0.14	0.14	0.76	17/34	1.00	2	3,2	Isoform 2 of SWI/SNF complex subunit SMARCC2
7818	DAP3	4	0.15	0.14	1.34	19/34	1.00	2	3,4	28S ribosomal protein S29, mitochondrial
4839	NOP2	7	0.14	0.14	1.18	26/34	1.00	2	7,7	Isoform 2 of Putative ribosomal RNA methyltransferase NOP2
50809	HP1BP3	4	0.15	0.14	1.42	19/34	1.00	2	4,3	Isoform 2 of Heterochromatin protein 1-binding protein 3
1656	DDX6	3	0.14	0.14	1.18	17/34	1.00	2	2,3	Probable ATP-dependent RNA helicase DDX6
81	ACTN4	5	0.15	0.14	0.75	21/34	1.00	2	5,5	Alpha-actinin-4
10483	SEC23B	5	0.15	0.14	1.91	21/34	1.00	2	6,3	Protein transport protein Sec23B
6203	RPS9	7	0.15	0.14	1.01	25/34	1.00	2	6,7	40S ribosomal protein S9
3178	HNRNPA1	12	0.14	0.14	0.79	34/34	1.00	2	10,14	Isoform A1-A of Heterogeneous nuclear ribonucleoprotein A1
6732	SRPK1	4	0.15	0.14	1.42	19/34	1.00	2	4,3	Serine/threonine-protein kinase SRPK1
1642	DDB1	4	0.13	0.14	0.43	22/34	1.18	2	4,3	DNA damage-binding protein 1
8575	PRKRA	3	0.14	0.14	1.98	17/34	1.00	2	3,2	Isoform 2 of Interferon-inducible double stranded RNA-dependent protein kinase activator A
11171	STRAP	6	0.15	0.14	1.22	23/34	1.00	2	6,6	Serine-threonine kinase receptor-associated protein
5501	PPP1CC	2	0.14	0.14	2.27	14/34	1.00	2	2,1	Isoform Gamma-2 of Serine/threonine-protein phosphatase PP1-gamma catalytic subunit
192111	PGAM5	2	0.08	0.14	0.06	25/34	1.00	2	1,2	Isoform 2 of Serine/threonine-protein phosphatase PGAM5, mitochondrial
331	XIAP	1	0.12	0.14	0.31	4/34	1.43	1	1,0	Baculoviral IAP repeat-containing protein 4
57492	ARID1B	3	0.14	0.13	0.99	18/34	1.00	2	1,4	Isoform 2 of AT-rich interactive domain-containing protein 1B
8148	TAF15	11	0.14	0.13	1.56	34/34	1.00	2	11,10	Isoform Short of TATA-binding protein-associated factor 2N
10449	ACAA2	1	0.14	0.13	3.14	3/34	1.00	1	1,0	3-ketoacyl-CoA thiolase, mitochondrial
5052	PRDX1	9	0.13	0.13	0.49	32/34	1.00	2	12,5	Peroxiredoxin-1
3326	HSP90AB1	9	0.14	0.13	0.23	31/34	1.00	2	10,8	Heat shock protein HSP 90-beta
7184	HSP90B1	8	0.13	0.13	1.30	30/34	1.00	2	9,6	Endoplasmin
3310	HSPA6	9	0.14	0.13	1.35	30/34	1.00	2	8,9	Heat shock 70 kDa protein 6
4736	RPL10A	5	0.13	0.13	0.59	24/34	1.00	2	3,6	60S ribosomal protein L10a
1213	CLTC	10	0.14	0.13	-0.09	33/34	1.05	2	9,10	Isoform 2 of Clathrin heavy chain 1
1653	DDX1	7	0.14	0.13	0.74	27/34	1.00	2	8,5	ATP-dependent RNA helicase DDX1
6189	RPS3A	10	0.14	0.13	1.21	33/34	1.00	2	9,10	40S ribosomal protein S3a
2926	GRSF1	4	0.13	0.13	0.99	21/34	1.00	2	4,4	G-rich sequence factor 1
4686	NCBP1	4	0.14	0.13	0.52	20/34	1.00	2	4,4	Nuclear cap-binding protein subunit 1
6629	SNRPB2	3	0.14	0.13	1.97	18/34	1.00	2	2,3	U2 small nuclear ribonucleoprotein B''
3276	PRMT1	6	0.14	0.13	0.84	25/34	1.00	2	7,5	Isoform 2 of Protein arginine N-methyltransferase 1
216	ALDH1A1	9	0.14	0.13	0.75	31/34	1.00	2	7,11	Retinal dehydrogenase 1
6711	SPTBN1	5	0.13	0.13	0.95	24/34	1.00	2	4,6	Spectrin beta chain, brain 1
11137	PWP1	4	0.13	0.13	1.15	21/34	1.00	2	3,5	Periodic tryptophan protein 1 homolog
221092	HNRNPUL2	3	0.14	0.13	0.82	18/34	1.00	2	1,5	Heterogeneous nuclear ribonucleoprotein U-like protein 2
3182	HNRNPAB	9	0.13	0.13	1.33	32/34	1.00	2	12,6	Isoform 2 of Heterogeneous nuclear ribonucleoprotein A/B
56886	UGGT1	3	0.14	0.13	2.52	18/34	1.00	2	2,3	Isoform 2 of UDP-glucose:glycoprotein glucosyltransferase 1
6134	RPL10	7	0.13	0.13	2.46	28/34	1.00	2	7,6	60S ribosomal protein L10
6635	SNRPE	4	0.14	0.13	1.46	20/34	1.00	2	4,3	Small nuclear ribonucleoprotein E
5937	RBMS1	2	0.13	0.13	1.59	15/34	1.00	2	2,1	Isoform 2 of RNA-binding motif, single-stranded-interacting protein 1
6631	SNRPC	6	0.13	0.13	2.52	26/34	1.00	2	6,5	U1 small nuclear ribonucleoprotein C
3185	HNRNPF	11	0.14	0.13	1.66	34/34	1.00	2	13,9	Heterogeneous nuclear ribonucleoprotein F
5479	PPIB	2	0.13	0.13	1.59	15/34	1.00	2	2,1	Peptidyl-prolyl cis-trans isomerase B
220988	HNRNPA3	11	0.14	0.13	1.09	34/34	1.00	2	7,14	Heterogeneous nuclear ribonucleoprotein A3
23029	RBM34	2	0.13	0.13	1.91	15/34	1.00	2	1,2	RNA-binding protein 34
5431	POLR2B	5	0.14	0.13	1.38	23/34	1.00	2	5,5	DNA-directed RNA polymerase II subunit RPB2
5315	PKM2	8	0.13	0.13	0.68	30/34	1.00	2	8,8	Pyruvate kinase isozymes M1/M2
57062	DDX24	5	0.14	0.13	1.41	23/34	1.00	2	4,5	ATP-dependent RNA helicase DDX24
51202	DDX47	1	0.14	0.13	0.80	10/34	1.00	2	1,1	Probable ATP-dependent RNA helicase DDX47
4644	MYO5A	1	0.10	0.13	0.07	6/34	1.00	1	1,0	Isoform 2 of Myosin-Va
4026	LPP	3	0.14	0.13	1.24	18/34	1.00	2	3,3	Lipoma-preferred partner
3191	HNRNPL	6	0.13	0.13	0.19	26/34	1.00	2	6,6	Heterogeneous nuclear ribonucleoprotein L
2547	XRCC6	4	0.13	0.13	0.38	21/34	1.00	2	4,4	X-ray repair cross-complementing protein 6
6633	SNRPD2	5	0.14	0.13	0.69	23/34	1.00	2	6,3	Small nuclear ribonucleoprotein Sm D2
55696	RBM22	1	0.14	0.13	3.14	3/34	1.00	1	0,1	Isoform 2 of Pre-mRNA-splicing factor RBM22
56829	ZC3HAV1	6	0.14	0.13	0.78	25/34	1.00	2	5,7	Isoform 2 of Zinc finger CCCH-type antiviral protein 1
1453	CSNK1D	1	0.12	0.13	0.49	4/34	1.27	1	0,1	Isoform 2 of Casein kinase I isoform delta
1104	RCC1	1	0.14	0.13	3.14	3/34	1.00	1	0,1	Isoform 2 of Regulator of chromosome condensation
6432	SRSF7	3	0.14	0.13	0.82	18/34	1.00	2	4,2	Isoform 2 of Serine/arginine-rich splicing factor 7
55337	C19orf66	1	0.14	0.13	3.14	3/34	1.00	1	1,0	Isoform 2 of UPF0515 protein C19orf66
85313	PPIL4	1	0.14	0.13	3.14	3/34	1.00	1	0,1	Peptidyl-prolyl cis-trans isomerase-like 4
54680	ZNHIT6	1	0.14	0.13	3.14	3/34	1.00	1	0,1	Box C/D snoRNA protein 1
4343	MOV10	4	0.14	0.13	0.14	20/34	1.00	2	4,3	Putative helicase MOV-10
56931	DUS3L	1	0.14	0.13	3.14	3/34	1.00	1	1,0	Isoform 2 of tRNA-dihydrouridine synthase 3-like
79080	CCDC86	1	0.14	0.13	3.14	3/34	1.00	1	0,1	Coiled-coil domain-containing protein 86
55319	C4orf43	1	0.14	0.13	3.14	3/34	1.00	1	0,1	UPF0534 protein C4orf43
2197	FAU	3	0.14	0.13	2.52	18/34	1.00	2	3,2	40S ribosomal protein S30
2803	GOLGA4	1	0.14	0.13	3.14	3/34	1.00	1	0,1	Uncharacterized protein
7916	PRRC2A	1	0.14	0.13	1.28	10/34	1.00	2	1,1	Protein PRRC2A
80324	PUS1	1	0.14	0.13	3.14	3/34	1.00	1	0,1	Isoform 2 of tRNA pseudouridine synthase A, mitochondrial
6150	MRPL23	1	0.14	0.13	1.28	10/34	1.00	2	1,1	39S ribosomal protein L23, mitochondrial
121551	BTBD11	1	0.14	0.13	3.14	3/34	1.00	1	0,1	Isoform 2 of Ankyrin repeat and BTB/POZ domain-containing protein BTBD11
487	ATP2A1	1	0.14	0.13	3.14	3/34	1.00	1	1,0	Isoform SERCA1A of Sarcoplasmic/endoplasmic reticulum calcium ATPase 1
79709	GLT25D1	1	0.14	0.13	3.14	3/34	1.00	1	0,1	Procollagen galactosyltransferase 1
9958	USP15	3	0.12	0.12	1.31	20/34	1.00	2	4,1	Isoform 2 of Ubiquitin carboxyl-terminal hydrolase 15
3320	HSP90AA1	8	0.12	0.12	0.42	32/34	1.00	2	8,7	Isoform 2 of Heat shock protein HSP 90-alpha
6175	RPLP0	9	0.13	0.12	0.94	33/34	1.00	2	7,11	60S acidic ribosomal protein P0
60	ACTB	10	0.13	0.12	-0.05	34/34	1.00	2	10,10	Actin, cytoplasmic 1
1937	EEF1G	2	0.13	0.12	2.01	16/34	1.00	2	1,2	Elongation factor 1-gamma
3008	HIST1H1E	8	0.13	0.12	1.68	31/34	1.00	2	9,7	Histone H1.4
3959	LGALS3BP	10	0.13	0.12	1.62	34/34	1.00	2	10,9	Galectin-3-binding protein
6191	RPS4X	9	0.12	0.12	1.38	34/34	1.00	2	8,10	40S ribosomal protein S4, X isoform
60528	ELAC2	1	0.12	0.12	2.67	4/34	1.00	1	1,0	Isoform 3 of Zinc phosphodiesterase ELAC protein 2
64975	MRPL41	1	0.12	0.12	2.67	4/34	1.00	1	0,1	39S ribosomal protein L41, mitochondrial
6737	TRIM21	8	0.13	0.12	0.52	31/34	1.00	2	7,8	Isoform 2 of E3 ubiquitin-protein ligase TRIM21
84298	LLPH	1	0.12	0.12	2.67	4/34	1.00	1	2,0	Protein LLP homolog
9181	ARHGEF2	1	0.12	0.12	2.67	4/34	1.00	1	0,1	Isoform 2 of Rho guanine nucleotide exchange factor 2
23633	KPNA6	1	0.12	0.12	1.93	4/34	1.00	1	0,1	Importin subunit alpha-7
1809	DPYSL3	7	0.12	0.12	0.67	30/34	1.00	2	7,7	Collapsin response mediator protein 4 long variant
83640	FAM103A1	3	0.12	0.12	1.08	20/34	1.00	2	2,4	Protein FAM103A1
6605	SMARCE1	3	0.12	0.12	2.09	20/34	1.00	2	3,2	Isoform 2 of SWI/SNF-related matrix-associated actin-dependent regulator of chromatin subfamily E member 1
4430	MYO1B	2	0.10	0.12	0.03	21/34	1.30	2	1,2	Isoform 2 of Myosin-Ib
8106	PABPN1	3	0.12	0.12	0.95	20/34	1.00	2	3,2	Isoform 2 of Polyadenylate-binding protein 2
2581	GALC	2	0.13	0.12	2.01	16/34	1.00	2	1,2	Galactocerebrosidase
6421	SFPQ	3	0.12	0.12	1.98	20/34	1.00	2	4,1	Splicing factor, proline- and glutamine-rich
6210	RPS15A	5	0.13	0.12	1.68	25/34	1.00	2	4,5	40S ribosomal protein S15a
10642	IGF2BP1	8	0.12	0.12	0.53	32/34	1.00	2	8,7	Insulin-like growth factor 2 mRNA-binding protein 1
11338	U2AF2	4	0.13	0.12	1.31	22/34	1.00	2	3,4	Isoform 2 of Splicing factor U2AF 65 kDa subunit
6238	RRBP1	3	0.13	0.12	1.30	19/34	1.00	2	2,3	Isoform 1 of Ribosome-binding protein 1
6431	SRSF6	6	0.13	0.12	1.87	27/34	1.00	2	6,6	Isoform SRP55-3 of Serine/arginine-rich splicing factor 6
23450	SF3B3	5	0.12	0.12	0.46	26/34	1.00	2	4,6	Splicing factor 3B subunit 3
6730	SRP68	1	0.12	0.12	2.67	4/34	1.00	1	1,0	Isoform 2 of Signal recognition particle 68 kDa protein
6595	SMARCA2	2	0.13	0.12	0.69	16/34	1.00	2	1,3	Isoform Short of Probable global transcription activator SNF2L2
137492	VPS37A	1	0.12	0.12	2.67	4/34	1.00	1	0,1	Isoform 2 of Vacuolar protein sorting-associated protein 37A
653489	RGPD3	1	0.12	0.12	2.67	4/34	1.00	1	0,1	RanBP2-like and GRIP domain-containing protein 3
64848	YTHDC2	4	0.12	0.12	0.70	23/34	1.00	2	6,2	Probable ATP-dependent RNA helicase YTHDC2
3075	CFH	1	0.12	0.12	2.67	4/34	1.00	1	2,0	Complement factor H
116541	MRPL54	1	0.12	0.12	2.67	4/34	1.00	1	1,0	39S ribosomal protein L54, mitochondrial
4076	CAPRIN1	4	0.12	0.12	0.89	23/34	1.00	2	3,4	Isoform 2 of Caprin-1
55037	PTCD3	2	0.13	0.12	1.20	16/34	1.00	2	2,1	Pentatricopeptide repeat-containing protein 3, mitochondrial
29889	GNL2	1	0.12	0.12	1.41	4/34	1.00	1	1,0	Nucleolar GTP-binding protein 2
26064	RAI14	1	0.11	0.12	0.12	5/34	1.40	1	0,1	Isoform 2 of Ankycorbin
54890	ALKBH5	1	0.12	0.12	2.67	4/34	1.00	1	0,1	Isoform 2 of Probable alpha-ketoglutarate-dependent dioxygenase ABH5
10432	RBM14	5	0.13	0.12	0.82	25/34	1.00	2	6,4	RNA-binding protein 14
84306	PDCD2L	1	0.12	0.12	1.93	4/34	1.00	1	0,1	Programmed cell death protein 2-like
5859	QARS	1	0.12	0.12	2.67	4/34	1.00	1	1,0	Glutaminyl-tRNA synthetase
8683	SRSF9	3	0.13	0.12	1.27	19/34	1.00	2	2,4	Serine/arginine-rich splicing factor 9
83737	ITCH	2	0.13	0.12	1.10	16/34	1.00	2	1,2	Isoform 2 of E3 ubiquitin-protein ligase Itchy homolog
5935	RBM3	4	0.13	0.12	1.48	22/34	1.00	2	4,3	Putative RNA-binding protein 3
4913	NTHL1	1	0.12	0.12	2.67	4/34	1.00	1	1,0	Endonuclease III-like protein 1
26263	FBXO22	1	0.12	0.12	2.67	4/34	1.00	1	0,1	Isoform 2 of F-box only protein 22
8473	OGT	1	0.12	0.12	0.25	4/34	1.00	1	0,1	Isoform 2 of UDP-N-acetylglucosamine--peptide N-acetylglucosaminyltransferase 110 kDa subunit
29088	MRPL15	2	0.13	0.12	0.87	16/34	1.00	2	1,2	39S ribosomal protein L15, mitochondrial
29115	SAP30BP	1	0.12	0.12	2.67	4/34	1.00	1	0,1	Isoform 2 of SAP30-binding protein
55234	SMU1	1	0.12	0.12	1.93	4/34	1.00	1	0,1	WD40 repeat-containing protein SMU1
80315	CPEB4	1	0.12	0.12	2.67	4/34	1.00	1	0,1	Isoform 2 of Cytoplasmic polyadenylation element-binding protein 4
6181	RPLP2	7	0.11	0.11	0.23	33/34	1.00	2	8,5	60S acidic ribosomal protein P2
6124	RPL4	7	0.12	0.11	0.33	32/34	1.00	2	5,9	60S ribosomal protein L4
6187	RPS2	7	0.12	0.11	1.20	32/34	1.00	2	5,8	40S ribosomal protein S2
10016	PDCD6	2	0.11	0.11	0.14	19/34	1.11	2	1,3	Programmed cell death protein 6
5339	PLEC	5	0.12	0.11	-0.26	27/34	1.00	2	4,6	Isoform 2 of Plectin
3009	HIST1H1B	1	0.12	0.11	0.11	12/34	1.00	2	1,1	Histone H1.5
6217	RPS16	6	0.12	0.11	0.66	30/34	1.00	2	7,4	40S ribosomal protein S16
3856	KRT8	7	0.12	0.11	-0.26	32/34	1.00	2	8,6	Keratin, type II cytoskeletal 8
84310	C7orf50	2	0.11	0.11	0.53	18/34	1.00	2	3,1	Uncharacterized protein C7orf50
3861	KRT14	6	0.12	0.11	0.20	30/34	1.00	2	5,7	Keratin, type I cytoskeletal 14
178	AGL	2	0.11	0.11	-0.08	18/34	1.00	2	1,2	Glycogen debranching enzyme
5217	PFN2	2	0.12	0.11	1.75	17/34	1.00	2	2,1	Isoform IIb of Profilin-2
6194	RPS6	8	0.12	0.11	1.39	33/34	1.00	2	8,7	40S ribosomal protein S6
10808	HSPH1	3	0.11	0.11	0.29	22/34	1.00	2	3,3	Isoform Beta of Heat shock protein 105 kDa
4637	MYL6	4	0.11	0.11	0.70	25/34	1.00	2	4,3	Isoform Smooth muscle of Myosin light polypeptide 6
6224	RPS20	5	0.12	0.11	1.41	27/34	1.00	2	2,7	40S ribosomal protein S20
10399	GNB2L1	2	0.11	0.11	1.13	18/34	1.00	2	2,2	Guanine nucleotide-binding protein subunit beta-2-like 1
6223	RPS19	5	0.11	0.11	0.88	28/34	1.00	2	6,4	40S ribosomal protein S19
79009	DDX50	3	0.11	0.11	0.72	22/34	1.00	2	1,5	ATP-dependent RNA helicase DDX50
2194	FASN	5	0.11	0.11	0.09	28/34	1.00	2	5,5	Fatty acid synthase
2539	G6PD	6	0.12	0.11	0.25	30/34	1.00	2	8,3	Isoform Long of Glucose-6-phosphate 1-dehydrogenase
84617	TUBB6	4	0.11	0.11	-0.62	25/34	1.00	2	3,5	Tubulin beta-6 chain
29894	CPSF1	2	0.11	0.11	1.11	18/34	1.00	2	2,2	Cleavage and polyadenylation specificity factor subunit 1
5610	EIF2AK2	2	0.11	0.11	1.26	18/34	1.00	2	1,3	Interferon-induced, double-stranded RNA-activated protein kinase
9908	G3BP2	3	0.12	0.11	0.97	21/34	1.00	2	2,4	Isoform B of Ras GTPase-activating protein-binding protein 2
6727	SRP14	1	0.12	0.11	0.55	12/34	1.00	2	1,1	Signal recognition particle 14 kDa protein
7153	TOP2A	2	0.11	0.11	1.48	9/34	1.00	1	0,3	Isoform 2 of DNA topoisomerase 2-alpha
5725	PTBP1	4	0.11	0.11	0.98	25/34	1.00	2	5,2	Isoform 2 of Polypyrimidine tract-binding protein 1
6207	RPS13	4	0.11	0.11	0.75	25/34	1.00	2	4,3	40S ribosomal protein S13
6193	RPS5	4	0.12	0.11	2.29	24/34	1.00	2	5,2	40S ribosomal protein S5
22827	PUF60	3	0.12	0.11	1.27	21/34	1.00	2	4,2	Isoform 2 of Poly(U)-binding-splicing factor PUF60
23378	RRP8	1	0.12	0.11	0.60	12/34	1.00	2	1,1	Ribosomal RNA-processing protein 8
55577	NAGK	2	0.11	0.11	1.46	18/34	1.00	2	1,2	N-acetyl-D-glucosamine kinase
56945	MRPS22	3	0.12	0.11	0.90	21/34	1.00	2	2,3	28S ribosomal protein S22, mitochondrial
8880	FUBP1	2	0.12	0.11	1.47	17/34	1.00	2	2,1	Far upstream element-binding protein 1
10643	IGF2BP3	3	0.12	0.11	-0.26	21/34	1.00	2	2,4	Insulin-like growth factor 2 mRNA-binding protein 3
27339	PRPF19	2	0.11	0.11	1.18	18/34	1.00	2	1,2	Pre-mRNA-processing factor 19
5352	PLOD2	2	0.11	0.11	0.59	18/34	1.00	2	1,2	Isoform 2 of Procollagen-lysine,2-oxoglutarate 5-dioxygenase 2
10992	SF3B2	2	0.11	0.11	0.50	18/34	1.00	2	2,2	Splicing factor 3B subunit 2
6738	TROVE2	2	0.11	0.11	0.93	18/34	1.00	2	1,2	60 kDa SS-A/Ro ribonucleoprotein
6780	STAU1	5	0.12	0.11	1.34	27/34	1.00	2	6,3	Isoform Short of Double-stranded RNA-binding protein Staufen homolog 1
26073	POLDIP2	1	0.12	0.11	0.97	12/34	1.00	2	1,1	Polymerase delta-interacting protein 2
377	ARF3	1	0.12	0.11	0.97	12/34	1.00	2	1,1	ADP-ribosylation factor 3
86	ACTL6A	2	0.11	0.11	1.06	18/34	1.00	2	1,3	Isoform 2 of Actin-like protein 6A
143	PARP4	3	0.11	0.11	1.00	22/34	1.00	2	2,3	Poly [ADP-ribose] polymerase 4
90957	DHX57	4	0.11	0.11	0.30	19/34	1.00	1	0,7	Putative ATP-dependent RNA helicase DHX57
10075	HUWE1	2	0.11	0.11	0.59	18/34	1.00	2	2,1	Isoform 2 of E3 ubiquitin-protein ligase HUWE1
5093	PCBP1	3	0.12	0.11	1.09	21/34	1.00	2	2,3	Poly(rC)-binding protein 1
24138	IFIT5	1	0.12	0.11	0.63	12/34	1.00	2	1,1	Interferon-induced protein with tetratricopeptide repeats 5
6311	ATXN2	3	0.12	0.11	1.06	21/34	1.00	2	3,2	Isoform 2 of Ataxin-2
51072	MEMO1	2	0.12	0.11	1.97	17/34	1.00	2	2,2	Isoform 2 of Protein MEMO1
79039	DDX54	2	0.11	0.11	0.71	18/34	1.00	2	1,2	Isoform 2 of ATP-dependent RNA helicase DDX54
5977	DPF2	1	0.12	0.11	0.71	12/34	1.00	2	1,1	Zinc finger protein ubi-d4
10549	PRDX4	4	0.11	0.10	0.02	26/34	1.00	2	5,2	Peroxiredoxin-4
6208	RPS14	6	0.10	0.10	0.88	33/34	1.00	2	4,7	40S ribosomal protein S14
6204	RPS10	4	0.10	0.10	1.12	27/34	1.00	2	5,3	40S ribosomal protein S10
23558	WBP2	1	0.11	0.10	2.36	5/34	1.00	1	1,0	WW domain-binding protein 2
10427	SEC24B	2	0.11	0.10	0.80	19/34	1.00	2	1,2	Isoform 2 of Protein transport protein Sec24B
708	C1QBP	4	0.10	0.10	0.37	27/34	1.00	2	3,4	Complement component 1 Q subcomponent-binding protein, mitochondrial
6129	RPL7	6	0.10	0.10	0.86	33/34	1.00	2	8,4	60S ribosomal protein L7
6201	RPS7	4	0.10	0.10	1.51	28/34	1.00	2	3,4	40S ribosomal protein S7
6275	S100A4	2	0.10	0.10	1.94	11/34	1.00	1	0,3	Protein S100-A4
2936	GSR	2	0.11	0.10	1.03	19/34	1.00	2	1,2	Isoform Cytoplasmic of Glutathione reductase, mitochondrial
6141	RPL18	7	0.11	0.10	1.16	34/34	1.00	2	7,7	60S ribosomal protein L18
3855	KRT7	4	0.10	0.10	0.28	27/34	1.00	2	4,3	Keratin, type II cytoskeletal 7
3852	KRT5	4	0.10	0.10	-0.08	27/34	1.00	2	5,2	Keratin, type II cytoskeletal 5
140807	KRT72	3	0.11	0.10	2.25	23/34	1.00	2	4,1	Isoform 2 of Keratin, type II cytoskeletal 72
2017	CTTN	3	0.11	0.10	0.48	23/34	1.00	2	2,3	Src substrate cortactin
3875	KRT18	6	0.11	0.10	-0.17	32/34	1.00	2	5,6	Keratin, type I cytoskeletal 18
3728	JUP	3	0.11	0.10	0.47	23/34	1.00	2	1,4	Junction plakoglobin
26156	RSL1D1	2	0.11	0.10	0.53	19/34	1.00	2	1,2	Ribosomal L1 domain-containing protein 1
10250	SRRM1	3	0.10	0.10	0.27	24/34	1.00	2	2,4	Isoform 2 of Serine/arginine repetitive matrix protein 1
6128	RPL6	7	0.11	0.10	0.75	34/34	1.00	2	6,7	60S ribosomal protein L6
10949	HNRNPA0	3	0.10	0.10	0.29	24/34	1.00	2	3,2	Heterogeneous nuclear ribonucleoprotein A0
57002	C7orf36	3	0.10	0.10	1.29	24/34	1.00	2	3,2	Uncharacterized protein C7orf36
6235	RPS29	1	0.11	0.10	1.27	13/34	1.00	2	1,1	40S ribosomal protein S29
3836	KPNA1	2	0.11	0.10	0.61	19/34	1.00	2	1,2	Importin subunit alpha-1
6205	RPS11	2	0.11	0.10	1.51	19/34	1.00	2	2,1	40S ribosomal protein S11
6396	SEC13	3	0.11	0.10	1.92	23/34	1.00	2	3,3	Protein SEC13 homolog
1808	DPYSL2	3	0.11	0.10	2.47	15/34	1.00	1	0,5	Dihydropyrimidinase-related protein 2
3921	RPSA	5	0.11	0.10	0.46	29/34	1.00	2	3,6	40S ribosomal protein SA
9774	BCLAF1	2	0.11	0.10	2.49	10/34	1.00	1	0,3	Isoform 2 of Bcl-2-associated transcription factor 1
6147	RPL23A	6	0.11	0.10	2.44	32/34	1.00	2	6,5	60S ribosomal protein L23a
51663	ZFR	2	0.11	0.10	0.29	19/34	1.00	2	2,1	Zinc finger RNA-binding protein
1466	CSRP2	1	0.11	0.10	1.27	13/34	1.00	2	1,1	Cysteine and glycine-rich protein 2
5034	P4HB	4	0.11	0.10	1.13	26/34	1.00	2	5,3	Protein disulfide-isomerase
6222	RPS18	5	0.11	0.10	0.86	30/34	1.00	2	3,7	40S ribosomal protein S18
6218	RPS17	3	0.10	0.10	0.95	24/34	1.00	2	3,3	40S ribosomal protein S17
6165	RPL35A	2	0.11	0.10	1.96	19/34	1.00	2	1,2	60S ribosomal protein L35a
10961	ERP29	1	0.11	0.10	2.36	5/34	1.00	1	0,1	Endoplasmic reticulum resident protein 29
7358	UGDH	4	0.10	0.10	0.51	27/34	1.00	2	3,4	UDP-glucose 6-dehydrogenase
23567	ZNF346	1	0.11	0.10	2.36	5/34	1.00	1	0,1	Isoform 2 of Zinc finger protein 346
5092	PCBD1	4	0.11	0.10	1.33	26/34	1.00	2	7,1	Pterin-4-alpha-carbinolamine dehydratase
113146	AHNAK2	1	0.08	0.10	-0.08	9/34	1.00	1	0,1	Isoform 2 of Protein AHNAK2
55646	LYAR	1	0.11	0.10	2.36	5/34	1.00	1	0,2	Cell growth-regulating nucleolar protein
10146	G3BP1	4	0.11	0.10	0.23	26/34	1.00	2	5,3	Ras GTPase-activating protein-binding protein 1
55421	C17orf85	1	0.10	0.10	0.63	14/34	1.00	2	1,1	Isoform 2 of Uncharacterized protein C17orf85
23215	PRRC2C	1	0.10	0.10	0.48	14/34	1.00	2	1,1	Isoform 2 of Protein PRRC2C
6627	SNRPA1	2	0.11	0.10	0.90	19/34	1.00	2	1,2	U2 small nuclear ribonucleoprotein A'
6130	RPL7A	5	0.11	0.10	0.42	30/34	1.00	2	5,5	60S ribosomal protein L7a
6430	SRSF5	3	0.11	0.10	0.87	23/34	1.00	2	4,2	Isoform SRP40-4 of Serine/arginine-rich splicing factor 5
10189	THOC4	3	0.11	0.10	0.79	23/34	1.00	2	2,3	THO complex subunit 4
6156	RPL30	3	0.11	0.10	0.89	23/34	1.00	2	4,1	60S ribosomal protein L30
1475	CSTA	1	0.11	0.10	2.36	5/34	1.00	1	0,1	Cystatin-A
81608	FIP1L1	1	0.11	0.10	0.92	13/34	1.00	2	1,1	Isoform 3 of Pre-mRNA 3'-end-processing factor FIP1
740	MRPL49	1	0.11	0.10	1.05	13/34	1.00	2	1,1	39S ribosomal protein L49, mitochondrial
10973	ASCC3	1	0.11	0.10	1.46	5/34	1.00	1	0,1	Activating signal cointegrator 1 complex subunit 3
57466	SCAF4	1	0.11	0.10	2.36	5/34	1.00	1	1,0	Isoform 2 of Splicing factor, arginine/serine-rich 15
2079	ERH	1	0.11	0.10	2.36	5/34	1.00	1	0,1	Enhancer of rudimentary homolog
217	ALDH2	1	0.09	0.10	0.20	8/34	1.54	1	0,1	Aldehyde dehydrogenase, mitochondrial
7415	VCP	3	0.08	0.10	-0.06	32/34	1.33	2	2,4	Transitional endoplasmic reticulum ATPase
4017	LOXL2	1	0.11	0.10	1.05	13/34	1.00	2	1,1	Lysyl oxidase homolog 2
6142	RPL18A	3	0.10	0.10	1.16	24/34	1.00	2	2,3	60S ribosomal protein L18a
10658	CELF1	1	0.11	0.10	2.36	5/34	1.00	1	1,0	Isoform 2 of CUGBP Elav-like family member 1
22913	RALY	1	0.11	0.10	0.92	13/34	1.00	2	1,1	Isoform 1 of RNA-binding protein Raly
51808	PHAX	1	0.11	0.10	0.80	13/34	1.00	2	1,1	Phosphorylated adapter RNA export protein
5578	PRKCA	1	0.10	0.10	0.24	6/34	1.12	1	0,1	Protein kinase C alpha type
2335	FN1	1	0.11	0.10	2.36	5/34	1.00	1	1,0	Isoform 10 of Fibronectin
563	AZGP1	1	0.11	0.10	2.36	5/34	1.00	1	0,1	Zinc-alpha-2-glycoprotein
4869	NPM1	4	0.09	0.09	0.18	31/34	1.00	2	4,3	Isoform 2 of Nucleophosmin
51649	MRPS23	2	0.09	0.09	0.89	22/34	1.00	2	2,1	28S ribosomal protein S23, mitochondrial
6154	RPL26	3	0.09	0.09	0.63	26/34	1.00	2	3,3	60S ribosomal protein L26
140576	S100A16	1	0.09	0.09	1.52	7/34	1.00	1	0,2	Protein S100-A16
26010	SPATS2L	2	0.10	0.09	0.40	21/34	1.00	2	1,3	Isoform 2 of SPATS2-like protein
9904	RBM19	1	0.09	0.09	1.52	7/34	1.00	1	0,2	Probable RNA-binding protein 19
6227	RPS21	3	0.09	0.09	1.24	26/34	1.00	2	4,2	40S ribosomal protein S21
65003	MRPL11	1	0.09	0.09	1.52	7/34	1.00	1	0,2	Isoform 2 of 39S ribosomal protein L11, mitochondrial
5033	P4HA1	2	0.09	0.09	1.47	14/34	1.00	1	0,4	Isoform 2 of Prolyl 4-hydroxylase subunit alpha-1
7531	YWHAE	1	0.06	0.09	-0.09	16/34	1.00	1	0,1	Isoform SV of 14-3-3 protein epsilon
7520	XRCC5	3	0.10	0.09	0.53	25/34	1.00	2	2,3	X-ray repair cross-complementing protein 5
51593	SRRT	2	0.10	0.09	1.02	20/34	1.00	2	1,2	Isoform 2 of Serrate RNA effector molecule homolog
10749	KIF1C	1	0.09	0.09	1.52	7/34	1.00	1	0,1	Kinesin-like protein KIF1C
6206	RPS12	1	0.09	0.09	1.93	7/34	1.00	1	0,2	40S ribosomal protein S12
7431	VIM	3	0.09	0.09	-0.35	28/34	1.03	2	1,4	Vimentin
4313	MMP2	3	0.10	0.09	0.45	19/34	1.00	1	6,0	72 kDa type IV collagenase
9045	RPL14	5	0.09	0.09	1.22	34/34	1.00	2	4,6	60S ribosomal protein L14
9184	BUB3	2	0.10	0.09	0.49	21/34	1.00	2	2,1	Isoform 2 of Mitotic checkpoint protein BUB3
4673	NAP1L1	4	0.09	0.09	0.60	31/34	1.00	2	4,4	Nucleosome assembly protein 1-like 1
3927	LASP1	1	0.09	0.09	1.12	15/34	1.00	2	1,1	Isoform 2 of LIM and SH3 domain protein 1
51116	MRPS2	2	0.09	0.09	1.29	14/34	1.00	1	0,3	28S ribosomal protein S2, mitochondrial
226	ALDOA	2	0.10	0.09	1.02	21/34	1.00	2	1,2	Fructose-bisphosphate aldolase A
3838	KPNA2	3	0.09	0.09	0.62	26/34	1.00	2	3,2	Importin subunit alpha-2
6132	RPL8	5	0.10	0.09	1.19	33/34	1.00	2	2,7	60S ribosomal protein L8
6173	RPL36A	2	0.10	0.09	1.27	20/34	1.00	2	3,1	60S ribosomal protein L36a
1431	CS	1	0.09	0.09	1.93	7/34	1.00	1	0,2	Citrate synthase, mitochondrial
6161	RPL32	4	0.10	0.09	1.43	29/34	1.00	2	5,3	60S ribosomal protein L32
84240	ZCCHC9	1	0.10	0.09	1.10	6/34	1.00	1	1,0	Zinc finger CCHC domain-containing protein 9
1041	CDSN	1	0.09	0.09	1.30	7/34	1.00	1	0,1	Corneodesmosin
51144	HSD17B12	1	0.10	0.09	1.38	6/34	1.00	1	0,1	Estradiol 17-beta-dehydrogenase 12
6742	SSBP1	2	0.09	0.09	1.19	22/34	1.00	2	2,2	Single-stranded DNA-binding protein, mitochondrial
1915	EEF1A1	5	0.09	0.09	-0.24	34/34	1.00	2	2,7	Elongation factor 1-alpha 1
284119	PTRF	3	0.09	0.09	0.12	27/34	1.00	2	4,2	Polymerase I and transcript release factor
7171	TPM4	1	0.08	0.09	0.02	10/34	1.54	1	1,0	Tropomyosin alpha-4 chain
6202	RPS8	5	0.10	0.09	0.41	33/34	1.00	2	4,6	40S ribosomal protein S8
5394	EXOSC10	2	0.09	0.09	1.08	14/34	1.00	1	0,3	Isoform 2 of Exosome component 10
9931	HELZ	1	0.09	0.09	1.93	7/34	1.00	1	1,0	Probable helicase with zinc finger domain
27316	RBMX	3	0.09	0.09	0.41	27/34	1.00	2	2,3	Heterogeneous nuclear ribonucleoprotein G
8664	EIF3D	1	0.09	0.09	1.93	7/34	1.00	1	1,0	Eukaryotic translation initiation factor 3 subunit D
3799	KIF5B	1	0.07	0.09	-0.06	11/34	1.63	1	1,0	Kinesin-1 heavy chain
6230	RPS25	4	0.09	0.09	1.10	30/34	1.00	2	3,5	40S ribosomal protein S25
1728	NQO1	1	0.09	0.09	0.53	15/34	1.00	2	1,1	NAD(P)H dehydrogenase [quinone] 1
51081	MRPS7	2	0.10	0.09	1.03	21/34	1.00	2	1,2	28S ribosomal protein S7, mitochondrial
6632	SNRPD1	5	0.10	0.09	0.67	33/34	1.00	2	5,5	Small nuclear ribonucleoprotein Sm D1
5111	PCNA	2	0.09	0.09	0.93	22/34	1.00	2	1,2	Proliferating cell nuclear antigen
23603	CORO1C	1	0.09	0.09	0.81	15/34	1.00	2	1,1	Coronin-1C
7532	YWHAG	1	0.07	0.09	-0.04	21/34	1.37	2	1,1	14-3-3 protein gamma
6118	RPA2	1	0.09	0.09	0.67	7/34	1.00	1	0,1	Isoform 2 of Replication protein A 32 kDa subunit
9667	SAFB2	1	0.10	0.09	1.65	6/34	1.00	1	0,1	Scaffold attachment factor B2
5432	POLR2C	1	0.09	0.09	0.63	15/34	1.00	2	1,1	DNA-directed RNA polymerase II subunit RPB3
5478	PPIA	4	0.09	0.09	0.85	31/34	1.00	2	3,5	Peptidyl-prolyl cis-trans isomerase A
54433	GAR1	1	0.10	0.09	2.10	6/34	1.00	1	1,0	Isoform 2 of H/ACA ribonucleoprotein complex subunit 1
4841	NONO	2	0.10	0.09	0.72	20/34	1.00	2	3,1	Non-POU domain-containing octamer-binding protein
6152	RPL24	4	0.10	0.09	1.48	29/34	1.00	2	3,4	60S ribosomal protein L24
5984	RFC4	1	0.09	0.09	1.52	7/34	1.00	1	0,1	Replication factor C subunit 4
55052	MRPL20	1	0.09	0.09	1.52	7/34	1.00	1	0,1	39S ribosomal protein L20, mitochondrial
6135	RPL11	4	0.09	0.09	0.94	31/34	1.00	2	3,4	Isoform 2 of 60S ribosomal protein L11
58155	PTBP2	1	0.09	0.09	1.93	7/34	1.00	1	0,1	Isoform 2 of Polypyrimidine tract-binding protein 2
6428	SRSF3	4	0.09	0.09	0.83	30/34	1.00	2	4,4	Serine/arginine-rich splicing factor 3
3067	HDC	1	0.10	0.09	2.10	6/34	1.00	1	1,0	Histidine decarboxylase
8241	RBM10	2	0.10	0.09	1.58	12/34	1.00	1	0,3	Isoform 2 of RNA-binding protein 10
6434	TRA2B	2	0.10	0.09	1.68	20/34	1.00	2	2,1	Isoform 3 of Transformer-2 protein homolog beta
2483	FRG1	1	0.10	0.09	2.10	6/34	1.00	1	1,0	Protein FRG1
1155	TBCB	1	0.10	0.09	2.10	6/34	1.00	1	0,1	Tubulin-folding cofactor B
5437	POLR2H	1	0.09	0.09	0.59	15/34	1.00	2	1,1	DNA-directed RNA polymerases I, II, and III subunit RPABC3
23560	GTPBP4	2	0.10	0.09	0.78	20/34	1.00	2	3,1	Nucleolar GTP-binding protein 1
847	CAT	1	0.09	0.09	1.93	7/34	1.00	1	0,1	Catalase
5686	PSMA5	1	0.09	0.09	1.93	7/34	1.00	1	0,1	Proteasome subunit alpha type-5
6427	SRSF2	4	0.09	0.09	1.14	30/34	1.00	2	4,3	Serine/arginine-rich splicing factor 2
10923	SUB1	1	0.10	0.09	2.10	6/34	1.00	1	1,0	Activated RNA polymerase II transcriptional coactivator p15
9584	RBM39	2	0.10	0.09	0.49	21/34	1.00	2	2,1	Isoform 2 of RNA-binding protein 39
4201	MEA1	1	0.09	0.09	1.93	7/34	1.00	1	0,1	Male-enhanced antigen 1
6464	SHC1	1	0.09	0.09	1.93	7/34	1.00	1	1,0	Isoform p52Shc of SHC-transforming protein 1
1828	DSG1	2	0.10	0.09	0.47	13/34	1.00	1	3,0	Desmoglein-1
3339	HSPG2	1	0.09	0.09	0.76	7/34	1.00	1	1,0	Basement membrane-specific heparan sulfate proteoglycan core protein
26574	AATF	1	0.09	0.09	0.56	7/34	1.00	1	0,1	Protein AATF
55660	PRPF40A	1	0.10	0.09	2.10	6/34	1.00	1	0,1	Isoform 2 of Pre-mRNA-processing factor 40 homolog A
6637	SNRPG	2	0.10	0.09	0.98	21/34	1.00	2	2,1	Small nuclear ribonucleoprotein G-like protein
388697	HRNR	2	0.09	0.09	-0.08	22/34	1.00	2	1,2	Hornerin
286077	FAM83H	1	0.10	0.09	1.25	6/34	1.00	1	0,1	Protein FAM83H
1778	DYNC1H1	2	0.09	0.09	-0.37	23/34	1.03	2	1,2	Cytoplasmic dynein 1 heavy chain 1
58517	RBM25	1	0.09	0.09	1.13	7/34	1.00	1	0,2	RNA-binding protein 25
5814	PURB	1	0.09	0.09	1.93	7/34	1.00	1	0,1	Transcriptional activator protein Pur-beta
51747	LUC7L3	2	0.10	0.09	0.50	21/34	1.00	2	1,3	Luc7-like protein 3
5644	PRSS1	1	0.09	0.09	1.93	7/34	1.00	1	0,1	Trypsin-1
9349	RPL23	5	0.10	0.09	0.77	32/34	1.00	2	5,4	60S ribosomal protein L23
9879	DDX46	1	0.10	0.09	1.65	6/34	1.00	1	0,1	Probable ATP-dependent RNA helicase DDX46
29102	DROSHA	1	0.10	0.09	2.10	6/34	1.00	1	0,1	Isoform 2 of Ribonuclease 3
10270	AKAP8	2	0.10	0.09	0.60	21/34	1.00	2	2,1	A-kinase anchor protein 8
7965	AIMP2	1	0.10	0.09	2.10	6/34	1.00	1	1,0	Aminoacyl tRNA synthase complex-interacting multifunctional protein 2
10179	RBM7	1	0.10	0.09	2.10	6/34	1.00	1	0,1	RNA-binding protein 7
11340	EXOSC8	1	0.09	0.09	1.93	7/34	1.00	1	0,1	Exosome complex component RRP43
9100	USP10	1	0.09	0.09	1.52	7/34	1.00	1	0,1	Isoform 2 of Ubiquitin carboxyl-terminal hydrolase 10
593	BCKDHA	1	0.10	0.09	2.10	6/34	1.00	1	0,1	2-oxoisovalerate dehydrogenase subunit alpha, mitochondrial
11198	SUPT16H	1	0.08	0.08	0.94	9/34	1.00	1	1,0	FACT complex subunit SPT16
11054	OGFR	1	0.09	0.08	1.77	8/34	1.00	1	0,1	Isoform 2 of Opioid growth factor receptor
55920	RCC2	2	0.09	0.08	0.41	23/34	1.00	2	2,2	Protein RCC2
51637	C14orf166	2	0.08	0.08	0.61	24/34	1.00	2	3,1	UPF0568 protein C14orf166
6228	RPS23	3	0.08	0.08	1.16	31/34	1.00	2	3,2	40S ribosomal protein S23
2023	ENO1	3	0.08	0.08	0.59	29/34	1.00	2	1,5	Alpha-enolase
11140	CDC37	1	0.07	0.08	0.04	11/34	1.26	1	0,1	Hsp90 co-chaperone Cdc37
808	CALM3	1	0.09	0.08	0.55	16/34	1.00	2	1,1	Calmodulin
8087	FXR1	2	0.08	0.08	0.00	25/34	1.00	2	2,2	Isoform 2 of Fragile X mental retardation syndrome-related protein 1
7295	TXN	3	0.08	0.08	1.53	30/34	1.00	2	3,2	Thioredoxin
5110	PCMT1	2	0.09	0.08	1.38	23/34	1.00	2	2,1	Isoform 2 of Protein-L-isoaspartate(D-aspartate) O-methyltransferase
6139	RPL17	4	0.09	0.08	0.25	33/34	1.00	2	3,5	60S ribosomal protein L17
84959	UBASH3B	1	0.08	0.08	1.37	9/34	1.00	1	1,0	Ubiquitin-associated and SH3 domain-containing protein B
6138	RPL15	4	0.08	0.08	0.34	34/34	1.00	2	5,3	60S ribosomal protein L15
26528	DAZAP1	3	0.08	0.08	1.50	31/34	1.00	2	2,3	DAZ-associated protein 1
11091	WDR5	1	0.08	0.08	0.54	17/34	1.00	2	1,1	WD repeat-containing protein 5
57690	TNRC6C	2	0.08	0.08	1.04	17/34	1.00	1	0,3	Isoform 2 of Trinucleotide repeat-containing gene 6C protein
10921	RNPS1	2	0.08	0.08	1.36	25/34	1.00	2	2,1	Isoform 2 of RNA-binding protein with serine-rich domain 1
1973	EIF4A1	3	0.09	0.08	0.61	28/34	1.00	2	2,3	Eukaryotic initiation factor 4A-I
51373	MRPS17	1	0.09	0.08	1.77	8/34	1.00	1	1,0	28S ribosomal protein S17, mitochondrial
6144	RPL21	4	0.08	0.08	1.27	34/34	1.00	2	4,4	60S ribosomal protein L21
7430	EZR	1	0.09	0.08	1.06	8/34	1.00	1	1,0	Ezrin
7086	TKT	3	0.08	0.08	-0.40	30/34	1.00	2	2,4	Transketolase
64963	MRPS11	1	0.08	0.08	1.15	9/34	1.00	1	1,0	Isoform 2 of 28S ribosomal protein S11, mitochondrial
23521	RPL13A	2	0.09	0.08	0.32	23/34	1.00	2	1,2	60S ribosomal protein L13a
6168	RPL37A	3	0.08	0.08	0.93	29/34	1.00	2	3,3	60S ribosomal protein L37a
191	AHCY	3	0.08	0.08	1.33	29/34	1.00	2	3,3	Adenosylhomocysteinase
6143	RPL19	4	0.09	0.08	0.55	33/34	1.00	2	4,4	60S ribosomal protein L19
6137	RPL13	4	0.09	0.08	0.96	32/34	1.00	2	2,5	60S ribosomal protein L13
3315	HSPB1	3	0.09	0.08	0.01	28/34	1.00	2	3,2	Heat shock protein beta-1
3066	HDAC2	1	0.08	0.08	1.37	9/34	1.00	1	0,1	Histone deacetylase 2
23350	U2SURP	2	0.09	0.08	0.79	16/34	1.00	1	0,4	Isoform 2 of U2 snRNP-associated SURP motif-containing protein
6160	RPL31	2	0.08	0.08	0.78	25/34	1.00	2	2,2	60S ribosomal protein L31
6500	SKP1	2	0.09	0.08	1.10	23/34	1.00	2	1,2	S-phase kinase-associated protein 1
6155	RPL27	4	0.09	0.08	0.72	32/34	1.00	2	3,4	60S ribosomal protein L27
11224	RPL35	2	0.08	0.08	0.83	24/34	1.00	2	2,2	60S ribosomal protein L35
6229	RPS24	4	0.09	0.08	0.73	32/34	1.00	2	3,5	Isoform 2 of 40S ribosomal protein S24
57696	DDX55	2	0.09	0.08	1.33	16/34	1.00	1	0,3	ATP-dependent RNA helicase DDX55
84319	C3orf26	1	0.09	0.08	1.22	8/34	1.00	1	0,1	Uncharacterized protein C3orf26
6733	SRPK2	1	0.09	0.08	0.67	16/34	1.00	2	1,1	Isoform 2 of Serine/threonine-protein kinase SRPK2
11222	MRPL3	1	0.09	0.08	1.45	8/34	1.00	1	1,0	39S ribosomal protein L3, mitochondrial
3308	HSPA4	2	0.08	0.08	0.05	24/34	1.00	2	2,2	Heat shock 70 kDa protein 4
126208	ZNF787	1	0.08	0.08	1.37	9/34	1.00	1	1,0	Zinc finger protein 787
2730	GCLM	1	0.08	0.08	1.37	9/34	1.00	1	1,0	Glutamate--cysteine ligase regulatory subunit
10412	NSA2	1	0.08	0.08	1.64	9/34	1.00	1	0,1	Ribosome biogenesis protein NSA2 homolog
2744	GLS	1	0.08	0.08	1.37	9/34	1.00	1	0,1	Isoform 3 of Glutaminase kidney isoform, mitochondrial
1175	AP2S1	1	0.08	0.08	0.45	9/34	1.00	1	0,1	Isoform 2 of AP-2 complex subunit sigma
201163	FLCN	1	0.08	0.08	-0.03	9/34	1.26	1	0,1	Folliculin
54464	XRN1	1	0.09	0.08	1.22	8/34	1.00	1	0,1	Isoform 2 of 5'-3' exoribonuclease 1
6164	RPL34	1	0.08	0.08	1.64	9/34	1.00	1	1,0	60S ribosomal protein L34
4173	MCM4	1	0.09	0.08	1.22	8/34	1.00	1	0,1	DNA replication licensing factor MCM4
10576	CCT2	2	0.08	0.08	0.22	24/34	1.00	2	2,2	T-complex protein 1 subunit beta
6231	RPS26	2	0.08	0.08	1.11	24/34	1.00	2	1,2	40S ribosomal protein S26
5094	PCBP2	2	0.08	0.08	0.18	25/34	1.00	2	2,2	Poly(rC)-binding protein 2
85456	TNKS1BP1	1	0.09	0.08	0.80	8/34	1.00	1	0,1	182 kDa tankyrase-1-binding protein
81887	LAS1L	1	0.09	0.08	1.22	8/34	1.00	1	0,1	Isoform 2 of Protein LAS1 homolog
10248	POP7	1	0.09	0.08	1.77	8/34	1.00	1	1,0	Ribonuclease P protein subunit p20
9782	MATR3	3	0.08	0.08	0.42	29/34	1.00	2	3,3	Matrin-3
23225	NUP210	1	0.09	0.08	1.22	8/34	1.00	1	0,1	Nuclear pore membrane glycoprotein 210
1936	EEF1D	1	0.09	0.08	0.63	16/34	1.00	2	1,1	Isoform 2 of Elongation factor 1-delta
553115	PEF1	1	0.08	0.08	1.64	9/34	1.00	1	1,0	Peflin
54386	TERF2IP	1	0.08	0.08	1.37	9/34	1.00	1	0,1	Telomeric repeat-binding factor 2-interacting protein 1
4191	MDH2	1	0.09	0.08	1.45	8/34	1.00	1	1,0	Malate dehydrogenase, mitochondrial
817	CAMK2D	1	0.09	0.08	0.35	8/34	1.00	1	1,0	Isoform Delta 10 of Calcium/calmodulin-dependent protein kinase type II subunit delta
5356	PLRG1	1	0.09	0.08	1.13	8/34	1.00	1	0,1	Isoform 2 of Pleiotropic regulator 1
4830	NME1	1	0.09	0.08	1.22	8/34	1.00	1	0,1	Isoform 2 of Nucleoside diphosphate kinase A
988	CDC5L	1	0.08	0.08	0.24	9/34	1.00	1	0,1	Cell division cycle 5-like protein
7053	TGM3	1	0.08	0.08	1.64	9/34	1.00	1	1,0	Protein-glutamine gamma-glutamyltransferase E
23185	LARP4B	1	0.08	0.08	1.37	9/34	1.00	1	0,1	La-related protein 4B
23645	PPP1R15A	1	0.09	0.08	1.04	16/34	1.00	2	1,1	Protein phosphatase 1 regulatory subunit 15A
51073	MRPL4	1	0.08	0.08	0.29	17/34	1.00	2	1,1	Isoform 2 of 39S ribosomal protein L4, mitochondrial
26354	GNL3	1	0.09	0.08	1.77	8/34	1.00	1	0,1	Isoform 2 of Guanine nucleotide-binding protein-like 3
8899	PRPF4B	1	0.09	0.08	1.45	8/34	1.00	1	0,1	Serine/threonine-protein kinase PRP4 homolog
307	ANXA4	1	0.07	0.07	0.89	11/34	1.00	1	0,1	Annexin A4
5269	SERPINB6	1	0.07	0.07	0.95	11/34	1.00	1	2,0	Serpin B6
2950	GSTP1	2	0.07	0.07	0.65	25/34	1.00	1	0,3	Glutathione S-transferase P
6146	RPL22	1	0.07	0.07	1.03	11/34	1.00	1	0,2	60S ribosomal protein L22
7706	TRIM25	1	0.07	0.07	0.75	11/34	1.00	1	2,0	E3 ubiquitin/ISG15 ligase TRIM25
8971	H1FX	2	0.07	0.07	0.21	27/34	1.00	2	2,1	Histone H1x
65095	KRI1	1	0.08	0.07	0.80	10/34	1.00	1	1,0	Isoform 2 of Protein KRI1 homolog
10916	MAGED2	1	0.08	0.07	0.57	10/34	1.00	1	0,1	Isoform 2 of Melanoma-associated antigen D2
84309	NUDT16L1	1	0.07	0.07	1.03	11/34	1.00	1	2,0	Protein syndesmos
10856	RUVBL2	2	0.07	0.07	-0.33	27/34	1.00	2	1,2	RuvB-like 2
6418	SET	1	0.07	0.07	1.33	12/34	1.00	1	0,1	Isoform 2 of Protein SET
10050	SLC17A4	1	0.08	0.07	1.54	10/34	1.00	1	1,0	Uncharacterized protein
6281	S100A10	2	0.07	0.07	0.68	27/34	1.00	2	2,2	Protein S100-A10
9513	FXR2	1	0.08	0.07	0.76	10/34	1.00	1	1,0	Fragile X mental retardation syndrome-related protein 2
26097	CHTOP	1	0.08	0.07	1.08	10/34	1.00	1	1,0	Isoform 2 of Chromatin target of PRMT1 protein
85236	HIST1H2BK	2	0.07	0.07	0.17	29/34	1.00	2	2,2	Histone H2B type 1-K
7756	ZNF207	1	0.07	0.07	0.89	12/34	1.00	1	0,1	Isoform 2 of Zinc finger protein 207
5393	EXOSC9	1	0.08	0.07	1.54	10/34	1.00	1	0,1	Isoform 2 of Exosome complex component RRP45
11052	CPSF6	2	0.07	0.07	0.61	25/34	1.00	1	0,3	Isoform 2 of Cleavage and polyadenylation specificity factor subunit 6
3028	HSD17B10	1	0.07	0.07	0.08	20/34	1.00	2	1,1	Isoform 2 of 3-hydroxyacyl-CoA dehydrogenase type-2
2935	GSPT1	1	0.07	0.07	1.03	11/34	1.00	1	0,1	Eukaryotic peptide chain release factor GTP-binding subunit ERF3A
10130	PDIA6	2	0.07	0.07	-0.14	29/34	1.00	2	2,2	Isoform 2 of Protein disulfide-isomerase A6
9775	EIF4A3	2	0.07	0.07	0.34	29/34	1.00	2	2,2	Eukaryotic initiation factor 4A-III
5939	RBMS2	1	0.07	0.07	-0.17	20/34	1.00	2	1,1	RNA-binding motif, single-stranded-interacting protein 2
6136	RPL12	3	0.08	0.07	0.66	32/34	1.00	2	2,4	60S ribosomal protein L12
9343	EFTUD2	2	0.07	0.07	0.50	22/34	1.00	1	0,3	116 kDa U5 small nuclear ribonucleoprotein component
3945	LDHB	2	0.07	0.07	0.41	28/34	1.00	2	1,2	L-lactate dehydrogenase B chain
7296	TXNRD1	1	0.07	0.07	0.97	12/34	1.00	1	0,2	Isoform 2 of Thioredoxin reductase 1, cytoplasmic
1072	CFL1	2	0.07	0.07	1.09	27/34	1.00	2	2,1	Cofilin-1
444	ASPH	2	0.08	0.07	-0.15	26/34	1.03	2	1,2	Aspartyl/asparaginyl beta-hydroxylase
65080	MRPL44	1	0.08	0.07	1.08	10/34	1.00	1	0,1	39S ribosomal protein L44, mitochondrial
5813	PURA	1	0.07	0.07	0.00	20/34	1.00	2	1,1	Transcriptional activator protein Pur-alpha
2597	GAPDH	3	0.07	0.07	0.06	33/34	1.00	2	4,2	Glyceraldehyde-3-phosphate dehydrogenase
6157	RPL27A	2	0.07	0.07	0.60	27/34	1.00	2	1,2	60S ribosomal protein L27a
1107	CHD3	1	0.08	0.07	0.65	10/34	1.00	1	1,0	Isoform 2 of Chromodomain-helicase-DNA-binding protein 3
8480	RAE1	1	0.07	0.07	0.85	12/34	1.00	1	1,0	mRNA export factor
23	ABCF1	1	0.07	0.07	0.89	11/34	1.00	1	0,1	Isoform 2 of ATP-binding cassette sub-family F member 1
7533	YWHAH	1	0.06	0.07	0.15	15/34	1.39	1	0,1	14-3-3 protein eta
1981	EIF4G1	1	0.07	0.07	0.71	11/34	1.00	1	0,1	Isoform B of Eukaryotic translation initiation factor 4 gamma 1
54888	NSUN2	2	0.08	0.07	0.82	19/34	1.00	1	0,3	tRNA (cytosine(34)-C(5))-methyltransferase
10314	LANCL1	1	0.08	0.07	1.54	10/34	1.00	1	1,0	LanC-like protein 1
51429	SNX9	1	0.07	0.07	0.57	12/34	1.00	1	0,1	Sorting nexin-9
6498	SKIL	1	0.07	0.07	1.45	11/34	1.00	1	0,1	Uncharacterized protein
2821	GPI	2	0.07	0.07	0.93	22/34	1.00	1	0,3	Glucose-6-phosphate isomerase
6133	RPL9	2	0.07	0.07	0.35	29/34	1.00	2	2,2	60S ribosomal protein L9
3248	HPGD	1	0.07	0.07	0.12	19/34	1.00	2	1,1	15-hydroxyprostaglandin dehydrogenase [NAD+]
1823	DSC1	1	0.07	0.07	0.97	12/34	1.00	1	0,2	Isoform 1B of Desmocollin-1
54984	PINX1	1	0.08	0.07	1.28	10/34	1.00	1	0,1	Isoform 2 of PIN2/TERF1-interacting telomerase inhibitor 1
29789	OLA1	2	0.08	0.07	1.51	19/34	1.00	1	0,3	Isoform 2 of Obg-like ATPase 1
3615	IMPDH2	1	0.08	0.07	-0.11	18/34	1.00	2	1,1	Inosine-5'-monophosphate dehydrogenase 2
10528	NOP56	1	0.07	0.07	0.64	12/34	1.00	1	0,2	Nucleolar protein 56
1832	DSP	2	0.07	0.07	0.01	25/34	1.01	1	3,0	Desmoplakin
5985	RFC5	1	0.07	0.07	0.97	12/34	1.00	1	1,0	Replication factor C subunit 5
7203	CCT3	1	0.07	0.07	-0.14	19/34	1.00	2	1,1	T-complex protein 1 subunit gamma
6123	RPL3L	1	0.07	0.07	0.73	19/34	1.00	2	1,1	60S ribosomal protein L3-like
23071	ERP44	1	0.07	0.07	0.71	12/34	1.00	1	0,1	Endoplasmic reticulum resident protein 44
25873	RPL36	2	0.07	0.07	0.53	28/34	1.00	2	2,2	60S ribosomal protein L36
3501	IGHG2	1	0.07	0.07	1.45	11/34	1.00	1	1,0	Ig gamma-2 chain C region
83743	GRWD1	2	0.07	0.07	0.23	25/34	1.00	1	3,0	Glutamate-rich WD repeat-containing protein 1
64794	DDX31	1	0.07	0.07	0.64	11/34	1.00	1	1,0	Isoform 2 of Probable ATP-dependent RNA helicase DDX31
8665	EIF3F	1	0.07	0.07	0.75	12/34	1.00	1	2,0	Eukaryotic translation initiation factor 3 subunit F
118460	EXOSC6	1	0.07	0.07	0.97	12/34	1.00	1	0,1	Exosome complex component MTR3
79169	C1orf35	1	0.07	0.07	1.33	12/34	1.00	1	1,0	Isoform 2 of Multiple myeloma tumor-associated protein 2
114823	LENG8	1	0.07	0.07	0.85	12/34	1.00	1	0,1	Isoform 2 of Leukocyte receptor cluster member 8
10131	TRAP1	2	0.07	0.07	0.66	28/34	1.00	2	1,2	Heat shock protein 75 kDa, mitochondrial
2280	FKBP1A	1	0.07	0.07	1.45	11/34	1.00	1	0,1	Peptidyl-prolyl cis-trans isomerase FKBP1A
9533	POLR1C	1	0.07	0.07	1.20	11/34	1.00	1	1,0	Isoform 2 of DNA-directed RNA polymerases I and III subunit RPAC1
64978	MRPL38	1	0.07	0.07	0.84	11/34	1.00	1	0,1	39S ribosomal protein L38, mitochondrial
55226	NAT10	1	0.07	0.07	0.71	12/34	1.00	1	0,1	N-acetyltransferase 10
3956	LGALS1	1	0.07	0.07	1.13	12/34	1.00	1	1,0	Galectin-1
79026	AHNAK	1	0.05	0.07	-0.29	23/34	1.91	1	0,1	Neuroblast differentiation-associated protein AHNAK
11060	WWP2	1	0.08	0.07	1.28	10/34	1.00	1	0,1	NEDD4-like E3 ubiquitin-protein ligase WWP2
6603	SMARCD2	1	0.07	0.07	1.20	11/34	1.00	1	1,0	Isoform 2 of SWI/SNF-related matrix-associated actin-dependent regulator of chromatin subfamily D member 2
4000	LMNA	2	0.07	0.07	-0.10	27/34	1.00	2	2,1	Prelamin-A/C
8985	PLOD3	1	0.07	0.07	1.33	12/34	1.00	1	0,2	Procollagen-lysine,2-oxoglutarate 5-dioxygenase 3
490	ATP2B1	1	0.08	0.07	0.57	10/34	1.00	1	1,0	Isoform A of Plasma membrane calcium-transporting ATPase 1
3801	KIFC3	1	0.08	0.07	0.16	10/34	1.00	1	0,1	Isoform 2 of Kinesin-like protein KIFC3
8650	NUMB	1	0.08	0.07	0.44	10/34	1.00	1	0,1	Isoform 2 of Protein numb homolog
4093	SMAD9	1	0.08	0.07	1.54	10/34	1.00	1	0,1	Isoform B of Mothers against decapentaplegic homolog 9
7407	VARS	1	0.08	0.07	1.28	10/34	1.00	1	0,1	Valyl-tRNA synthetase
22938	SNW1	1	0.08	0.07	1.54	10/34	1.00	1	1,0	SNW domain-containing protein 1
64087	MCCC2	1	0.06	0.06	0.27	14/34	1.00	1	1,0	Isoform 2 of Methylcrotonoyl-CoA carboxylase beta chain, mitochondrial
6921	TCEB1	1	0.06	0.06	0.54	17/34	1.00	1	0,1	Transcription elongation factor B polypeptide 1
103	ADAR	1	0.07	0.06	0.67	13/34	1.00	1	0,1	Isoform 2 of Double-stranded RNA-specific adenosine deaminase
1938	EEF2	2	0.06	0.06	-0.37	31/34	1.03	1	4,0	Elongation factor 2
6209	RPS15	2	0.07	0.06	-0.15	30/34	1.00	2	2,2	40S ribosomal protein S15
10514	MYBBP1A	1	0.06	0.06	0.13	16/34	1.00	1	2,0	Isoform 2 of Myb-binding protein 1A
6599	SMARCC1	1	0.06	0.06	0.18	14/34	1.00	1	2,0	SWI/SNF complex subunit SMARCC1
23499	MACF1	1	0.06	0.06	0.00	17/34	1.00	1	0,2	Microtubule-actin cross-linking factor 1, isoform 4
6050	RNH1	1	0.07	0.06	0.24	21/34	1.00	2	1,1	Ribonuclease inhibitor
80349	WDR61	1	0.06	0.06	0.87	14/34	1.00	1	1,0	WD repeat-containing protein 61
829	CAPZA1	1	0.06	0.06	0.13	14/34	1.00	1	0,1	F-actin-capping protein subunit alpha-1
11273	ATXN2L	1	0.06	0.06	0.10	22/34	1.00	2	1,1	Isoform 2 of Ataxin-2-like protein
9601	PDIA4	1	0.06	0.06	0.63	14/34	1.00	1	1,0	Protein disulfide-isomerase A4
310	ANXA7	1	0.06	0.06	1.04	16/34	1.00	1	0,1	Isoform 2 of Annexin A7
8662	EIF3B	1	0.06	0.06	0.77	16/34	1.00	1	1,0	Isoform 2 of Eukaryotic translation initiation factor 3 subunit B
498	ATP5A1	2	0.06	0.06	-0.59	32/34	1.00	2	1,2	ATP synthase subunit alpha, mitochondrial
51692	CPSF3	1	0.06	0.06	0.81	15/34	1.00	1	0,2	Cleavage and polyadenylation specificity factor subunit 3
10935	PRDX3	1	0.06	0.06	0.71	15/34	1.00	1	2,0	Thioredoxin-dependent peroxide reductase, mitochondrial
6389	SDHA	1	0.06	0.06	-0.18	24/34	1.00	2	1,1	Succinate dehydrogenase [ubiquinone] flavoprotein subunit, mitochondrial
4172	MCM3	1	0.06	0.06	-0.12	17/34	1.00	1	2,0	DNA replication licensing factor MCM3
10594	PRPF8	1	0.06	0.06	-0.02	17/34	1.05	1	2,0	Pre-mRNA-processing-splicing factor 8
79672	FN3KRP	1	0.06	0.06	0.54	15/34	1.00	1	1,0	Ketosamine-3-kinase
80335	WDR82	1	0.07	0.06	1.05	13/34	1.00	1	0,1	WD repeat-containing protein 82
79869	CPSF7	1	0.06	0.06	0.89	16/34	1.00	1	0,1	Isoform 2 of Cleavage and polyadenylation specificity factor subunit 7
3692	EIF6	1	0.06	0.06	0.81	15/34	1.00	1	1,0	Eukaryotic translation initiation factor 6
9295	SRSF11	1	0.06	0.06	1.18	14/34	1.00	1	0,1	Serine/arginine-rich splicing factor 11
60488	MRPS35	1	0.06	0.06	0.40	16/34	1.00	1	1,0	Isoform 2 of 28S ribosomal protein S35, mitochondrial
2923	PDIA3	1	0.07	0.06	0.70	13/34	1.00	1	1,0	Protein disulfide-isomerase A3
10605	PAIP1	1	0.06	0.06	0.84	17/34	1.00	1	0,2	Isoform 2 of Polyadenylate-binding protein-interacting protein 1
55213	RCBTB1	1	0.06	0.06	0.63	15/34	1.00	1	0,1	Isoform 2 of RCC1 and BTB domain-containing protein 1
28957	MRPS28	1	0.06	0.06	0.22	16/34	1.00	1	0,1	28S ribosomal protein S28, mitochondrial
5688	PSMA7	1	0.06	0.06	0.95	15/34	1.00	1	0,1	Isoform 2 of Proteasome subunit alpha type-7
9685	CLINT1	1	0.06	0.06	0.00	18/34	1.00	1	0,2	Isoform 2 of Clathrin interactor 1
6158	RPL28	2	0.06	0.06	0.39	34/34	1.00	2	1,3	60S ribosomal protein L28
5518	PPP2R1A	1	0.06	0.06	0.14	16/34	1.00	1	0,2	Serine/threonine-protein phosphatase 2A 65 kDa regulatory subunit A alpha isoform
5516	PPP2CB	1	0.06	0.06	0.11	22/34	1.00	2	1,1	Serine/threonine-protein phosphatase 2A catalytic subunit beta isoform
7019	TFAM	1	0.07	0.06	0.46	13/34	1.00	1	1,0	Transcription factor A, mitochondrial
55794	DDX28	1	0.07	0.06	1.05	13/34	1.00	1	0,1	Probable ATP-dependent RNA helicase DDX28
51631	LUC7L2	2	0.07	0.06	0.17	26/34	1.00	1	3,0	Putative RNA-binding protein Luc7-like 2
3329	HSPD1	2	0.06	0.06	-0.70	34/34	1.00	2	2,2	60 kDa heat shock protein, mitochondrial
1968	EIF2S3	1	0.06	0.06	0.37	14/34	1.00	1	1,0	Eukaryotic translation initiation factor 2 subunit 3
8518	IKBKAP	1	0.06	0.06	0.43	14/34	1.00	1	0,1	Elongator complex protein 1
3336	HSPE1	1	0.07	0.06	1.05	13/34	1.00	1	0,1	10 kDa heat shock protein, mitochondrial
8886	DDX18	1	0.07	0.06	0.33	13/34	1.00	1	0,1	ATP-dependent RNA helicase DDX18
4521	NUDT1	1	0.06	0.06	1.18	14/34	1.00	1	1,0	Isoform p22 of 7,8-dihydro-8-oxoguanine triphosphatase
6117	RPA1	1	0.06	0.06	0.00	15/34	1.17	1	1,0	Replication protein A 70 kDa DNA-binding subunit
84450	ZNF512	1	0.06	0.06	1.12	15/34	1.00	1	0,1	Zinc finger protein 512
10598	AHSA1	1	0.06	0.06	0.21	14/34	1.00	1	0,1	Activator of 90 kDa heat shock protein ATPase homolog 1
51067	YARS2	1	0.06	0.06	0.76	14/34	1.00	1	1,0	Tyrosyl-tRNA synthetase, mitochondrial
8335	HIST1H2AB	1	0.06	0.06	0.33	15/34	1.00	1	1,0	Histone H2A type 1-B/E
83759	RBM4B	1	0.06	0.06	0.30	16/34	1.00	1	2,0	RNA-binding protein 4B
5434	POLR2E	1	0.06	0.06	0.95	15/34	1.00	1	1,0	DNA-directed RNA polymerases I, II, and III subunit RPABC1
348262	FAM195B	1	0.07	0.06	1.05	13/34	1.00	1	2,0	Protein FAM195B
4144	MAT2A	1	0.06	0.06	0.00	24/34	1.00	2	1,1	S-adenosylmethionine synthase isoform type-2
9128	PRPF4	1	0.07	0.06	0.75	13/34	1.00	1	0,1	Isoform 2 of U4/U6 small nuclear ribonucleoprotein Prp4
10849	CD3EAP	1	0.06	0.06	0.70	14/34	1.00	1	1,0	Isoform 2 of DNA-directed RNA polymerase I subunit RPA34
10465	PPIH	1	0.06	0.06	1.00	14/34	1.00	1	1,0	Peptidyl-prolyl cis-trans isomerase H
64965	MRPS9	1	0.07	0.06	-0.08	21/34	1.00	2	1,1	28S ribosomal protein S9, mitochondrial
113251	LARP4	1	0.06	0.06	0.20	14/34	1.00	1	0,1	Isoform 2 of La-related protein 4
7167	TPI1	1	0.06	0.06	0.24	17/34	1.00	1	1,0	Isoform 2 of Triosephosphate isomerase
1500	CTNND1	1	0.06	0.06	-0.19	16/34	1.09	1	0,1	Isoform 2AB of Catenin delta-1
54148	MRPL39	1	0.07	0.06	0.63	13/34	1.00	1	0,1	Isoform 2 of 39S ribosomal protein L39, mitochondrial
57016	AKR1B10	1	0.07	0.06	0.03	21/34	1.00	2	1,1	Aldo-keto reductase family 1 member B10
64949	MRPS26	1	0.06	0.06	0.54	17/34	1.00	1	0,1	28S ribosomal protein S26, mitochondrial
64969	MRPS5	1	0.06	0.06	0.51	17/34	1.00	1	2,0	28S ribosomal protein S5, mitochondrial
6602	SMARCD1	1	0.07	0.06	1.05	13/34	1.00	1	0,1	Isoform 2 of SWI/SNF-related matrix-associated actin-dependent regulator of chromatin subfamily D member 1
7082	TJP1	1	0.05	0.06	-0.20	23/34	1.20	1	2,0	Tight junction protein ZO-1
1965	EIF2S1	1	0.06	0.06	0.50	14/34	1.00	1	0,1	Eukaryotic translation initiation factor 2 subunit 1
10015	PDCD6IP	1	0.06	0.06	0.05	16/34	1.06	1	1,0	Programmed cell death 6-interacting protein
832	CAPZB	1	0.06	0.06	0.26	17/34	1.00	1	0,1	Isoform 2 of F-actin-capping protein subunit beta
871	SERPINH1	1	0.06	0.06	-0.36	24/34	1.00	2	1,1	Serpin H1
339230	CCDC137	1	0.06	0.06	0.76	14/34	1.00	1	0,1	Coiled-coil domain-containing protein 137
9939	RBM8A	1	0.06	0.06	0.48	17/34	1.00	1	0,1	Isoform 2 of RNA-binding protein 8A
54915	YTHDF1	1	0.06	0.06	0.07	16/34	1.00	1	1,0	Isoform 2 of YTH domain family protein 1
10657	KHDRBS1	1	0.07	0.06	0.75	13/34	1.00	1	0,1	Isoform 2 of KH domain-containing, RNA-binding, signal transduction-associated protein 1
9967	THRAP3	1	0.06	0.06	0.66	14/34	1.00	1	1,0	Thyroid hormone receptor-associated protein 3
6829	SUPT5H	1	0.06	0.06	0.15	18/34	1.10	1	0,2	Isoform 2 of Transcription elongation factor SPT5
22916	NCBP2	1	0.06	0.06	0.55	15/34	1.00	1	0,1	Isoform 2 of Nuclear cap-binding protein subunit 2
51726	DNAJB11	1	0.06	0.06	0.30	17/34	1.00	1	0,1	DnaJ homolog subfamily B member 11
6634	SNRPD3	1	0.06	0.06	0.16	23/34	1.00	2	1,1	Small nuclear ribonucleoprotein Sm D3
10802	SEC24A	1	0.07	0.06	1.05	13/34	1.00	1	1,0	Protein transport protein Sec24A
28973	MRPS18B	1	0.06	0.05	-0.11	18/34	1.00	1	2,0	28S ribosomal protein S18b, mitochondrial
7077	TIMP2	1	0.06	0.05	0.22	18/34	1.00	1	0,1	Metalloproteinase inhibitor 2
10971	YWHAQ	1	0.05	0.05	-0.41	30/34	1.02	2	1,1	14-3-3 protein theta
4522	MTHFD1	1	0.05	0.05	-0.26	20/34	1.00	1	1,0	C-1-tetrahydrofolate synthase, cytoplasmic
117159	DCD	1	0.05	0.05	0.13	25/34	1.00	1	2,0	Dermcidin
301	ANXA1	1	0.06	0.05	0.63	19/34	1.00	1	1,0	Annexin A1
27067	STAU2	1	0.05	0.05	-0.18	20/34	1.00	1	0,2	Isoform 2 of Double-stranded RNA-binding protein Staufen homolog 2
22948	CCT5	1	0.06	0.05	-0.02	19/34	1.00	1	0,1	T-complex protein 1 subunit epsilon
51428	DDX41	1	0.05	0.05	0.00	24/34	1.00	1	0,1	Probable ATP-dependent RNA helicase DDX41
10614	HEXIM1	1	0.05	0.05	0.58	20/34	1.00	1	0,2	Protein HEXIM1
7284	TUFM	1	0.05	0.05	-0.65	28/34	1.00	2	1,1	Elongation factor Tu, mitochondrial
8939	FUBP3	1	0.05	0.05	-0.20	20/34	1.00	1	0,1	Isoform 2 of Far upstream element-binding protein 3
8878	SQSTM1	1	0.05	0.05	-0.52	27/34	1.34	1	0,1	Isoform 2 of Sequestosome-1
3735	KARS	1	0.05	0.05	-0.21	23/34	1.00	1	0,1	Isoform Mitochondrial of Lysyl-tRNA synthetase
3376	IARS	1	0.05	0.05	0.23	21/34	1.00	1	2,0	Isoleucyl-tRNA synthetase, cytoplasmic
8140	SLC7A5	1	0.06	0.05	0.35	19/34	1.00	1	0,1	Large neutral amino acids transporter small subunit 1
3030	HADHA	1	0.05	0.05	-0.41	25/34	1.31	1	0,1	Trifunctional enzyme subunit alpha, mitochondrial
23451	SF3B1	1	0.06	0.05	-0.23	18/34	1.00	1	1,0	Splicing factor 3B subunit 1
7534	YWHAZ	1	0.05	0.05	-0.21	28/34	1.35	1	1,0	14-3-3 protein zeta/delta
26284	ERAL1	1	0.05	0.05	0.09	20/34	1.00	1	2,0	GTPase Era, mitochondrial
23020	SNRNP200	1	0.06	0.05	0.08	19/34	1.00	1	0,1	U5 small nuclear ribonucleoprotein 200 kDa helicase
8826	IQGAP1	1	0.05	0.05	-0.54	24/34	1.00	1	0,2	Ras GTPase-activating-like protein IQGAP1
64759	TNS3	1	0.06	0.05	-0.16	18/34	1.00	1	0,1	Isoform 3 of Tensin-3
1984	EIF5A	1	0.05	0.05	0.14	21/34	1.00	1	0,1	Isoform 2 of Eukaryotic translation initiation factor 5A-1
64432	MRPS25	1	0.05	0.05	0.00	20/34	1.00	1	0,2	28S ribosomal protein S25, mitochondrial
10294	DNAJA2	1	0.06	0.05	-0.19	19/34	1.00	1	0,1	DnaJ homolog subfamily A member 2
1503	CTPS	1	0.05	0.05	-0.32	24/34	1.00	1	1,0	CTP synthase 1
65265	C8orf33	1	0.05	0.05	0.78	21/34	1.00	1	1,0	Isoform 2 of UPF0488 protein C8orf33
1211	CLTA	1	0.06	0.05	0.16	19/34	1.00	1	0,1	Isoform Non-brain of Clathrin light chain A
7812	CSDE1	1	0.06	0.05	-0.07	19/34	1.00	1	1,0	Isoform Short of Cold shock domain-containing protein E1
23435	TARDBP	1	0.06	0.05	0.58	18/34	1.00	1	1,0	Isoform 2 of TAR DNA-binding protein 43
509	ATP5C1	1	0.06	0.05	0.05	18/34	1.00	1	1,0	Isoform Heart of ATP synthase subunit gamma, mitochondrial
6169	RPL38	1	0.06	0.05	-0.23	25/34	1.00	2	1,1	60S ribosomal protein L38
55692	LUC7L	1	0.05	0.05	-0.19	24/34	1.00	1	1,0	Isoform 2 of Putative RNA-binding protein Luc7-like 1
3915	LAMC1	1	0.05	0.05	-0.21	25/34	1.00	1	0,1	Laminin subunit gamma-1
10262	SF3B4	1	0.06	0.05	0.73	19/34	1.00	1	1,0	Splicing factor 3B subunit 4
80086	TUBA4B	1	0.05	0.05	-0.58	28/34	1.00	2	1,1	Putative tubulin-like protein alpha-4B
26135	SERBP1	1	0.05	0.05	-0.10	24/34	1.00	1	0,2	Isoform 3 of Plasminogen activator inhibitor 1 RNA-binding protein
4176	MCM7	1	0.06	0.05	-0.38	19/34	1.00	1	0,1	Isoform 2 of DNA replication licensing factor MCM7
55700	MAP7D1	1	0.06	0.05	0.02	19/34	1.00	1	0,1	Isoform 2 of MAP7 domain-containing protein 1
51602	NOP58	1	0.06	0.05	0.38	18/34	1.00	1	0,1	Nucleolar protein 58
7307	U2AF1	1	0.05	0.05	0.06	20/34	1.00	1	0,1	Splicing factor U2AF 35 kDa subunit
6159	RPL29	1	0.04	0.04	-0.13	29/34	1.00	1	2,0	60S ribosomal protein L29
2058	EPRS	1	0.05	0.04	-0.15	27/34	1.00	1	0,1	Bifunctional aminoacyl-tRNA synthetase
8370	HIST2H4A	1	0.04	0.04	-0.72	33/34	1.00	2	1,1	Histone H4
8566	PDXK	1	0.05	0.04	0.00	26/34	1.00	1	1,0	Isoform 3 of Pyridoxal kinase
6234	RPS28	1	0.05	0.04	-0.29	27/34	1.00	1	0,2	40S ribosomal protein S28
6636	SNRPF	1	0.05	0.04	-0.29	30/34	1.00	2	1,1	Small nuclear ribonucleoprotein F
25797	QPCT	1	0.05	0.04	-0.19	26/34	1.00	1	0,1	Isoform 2 of Glutaminyl-peptide cyclotransferase
3301	DNAJA1	1	0.04	0.04	-0.73	31/34	1.00	1	0,2	DnaJ homolog subfamily A member 1
